# Supplementary material for: Access to thiazoles via [3 + 2] cycloaddition of 1,2,3-thiadiazoles with isonitriles
Source: Royal Society of Chemistry journal article supplement (doi:10.1039/d1qo00165e), 2021-01-01

## *Supporting Information*

# **Access to Thiazoles via [3+2] Cycloaddition of 1,2,3-Thiadiazoles with Isonitriles**

Qiaoyu An, Lei Liu, Zongyuan Tang, Han Luo, You Li, Mingchuan Xu, and Baosheng Li\*

*School of Chemistry and Chemical Engineering, Chongqing University, 174 Shazheng Street, Chongqing, 400044, P. R. China*

E-mail: libs@cqu.edu.cn

## **Table of Content**

|                                                       |     |
|-------------------------------------------------------|-----|
| 1 General Information.....                            | S1  |
| 2 Preparation of substrates <b>1</b> .....            | S2  |
| 3 General procedure.....                              | S3  |
| 3.1 Syntheses of substrates <b>1</b> .....            | S3  |
| 3.1.1 Synthesis of 1,2,3-thiadazole <b>1l</b> .....   | S3  |
| 3.1.2 Synthesis of 1,2,3-thiadazole <b>1p</b> .....   | S3  |
| 3.1.3 Synthesis of 1,2,3-thiadazole <b>1q</b> .....   | S4  |
| 3.1.4 Synthesis of 1,2,3-thiadazole <b>1r</b> .....   | S4  |
| 3.2 Syntheses of thiazole products <b>3</b> .....     | S5  |
| 3.2.1 General Procedure A.....                        | S5  |
| 3.2.2 General Procedure B.....                        | S5  |
| 3.3 Synthetic transformations and applications.....   | S6  |
| 3.3.1 Gram-scale synthesis of <b>3g</b> .....         | S6  |
| 3.3.2 The reduction of <b>3g</b> .....                | S6  |
| 3.3.3 The Suzuki coupling reaction of <b>3g</b> ..... | S7  |
| 3.3.4 Synthesis of bioactive compound <b>7</b> .....  | S7  |
| 4 Characterization data for compounds.....            | S8  |
| 5 X-ray structure.....                                | S19 |
| 6 References.....                                     | S20 |
| 7 Copies of NMR spectra.....                          | S21 |

---

## 1 General Information

All reactions were conducted under argon atmosphere using flame-dried seal the tube with magnetic stirring unless otherwise noted. All solvents were dried or distilled by standard methods. Reactions were monitored by qualitative thin-layer chromatography (TLC) on silica gel F254 plates. Visualization on TLC was achieved by the use of UV light (254 nm).  $^1\text{H}$  and  $^{13}\text{C}$  NMR spectra were recorded on a Bruker 500 spectrometer ( $^1\text{H}$  at 500 MHz and  $^{13}\text{C}$  at 125 MHz),  $^{19}\text{F}$  NMR spectra were recorded on a Bruker 600 spectrometer ( $^{19}\text{F}$  at 564 MHz).  $^1\text{H}$  NMR spectra data were reported as values in ppm relative to TMS (0.00),  $^{13}\text{C}$  NMR spectra data were reported as values in ppm relative to chloroform (77.00).  $^1\text{H}$  NMR coupling constants were reported in Hz, and multiplicity were indicated as follows: s (singlet); d (doublet); t (triplet); m (multiplet); q (quartet). IR spectra were measured on a Nicolet iS50 FT-IR spectrometer using KBr plates. The HRMS analysis was obtained on a Bruker Apex II FT-ICR mass spectrometer with ESI ionization method. Single crystal X-ray diffraction measurement was performed on an Agilent SuperNova-CCD X-ray diffractometer. Melting points were measured on a microscopic melting point apparatus and are uncorrected.

## 2 Preparation of substrates 1

The substrates **1a**,<sup>1</sup> **1b–1c**,<sup>2</sup> **1d–1j**,<sup>1</sup> **1k**,<sup>2</sup> **1l–1m**,<sup>1</sup> **1n–1o**,<sup>3</sup> **1p**,<sup>1</sup> **1q–1s**,<sup>2</sup> **2a–2c** are synthesized base on the reported literatures. Isonitriles **2a–2c** are commercially available. The preparation of new compounds, and their characterization data are provided as follows.

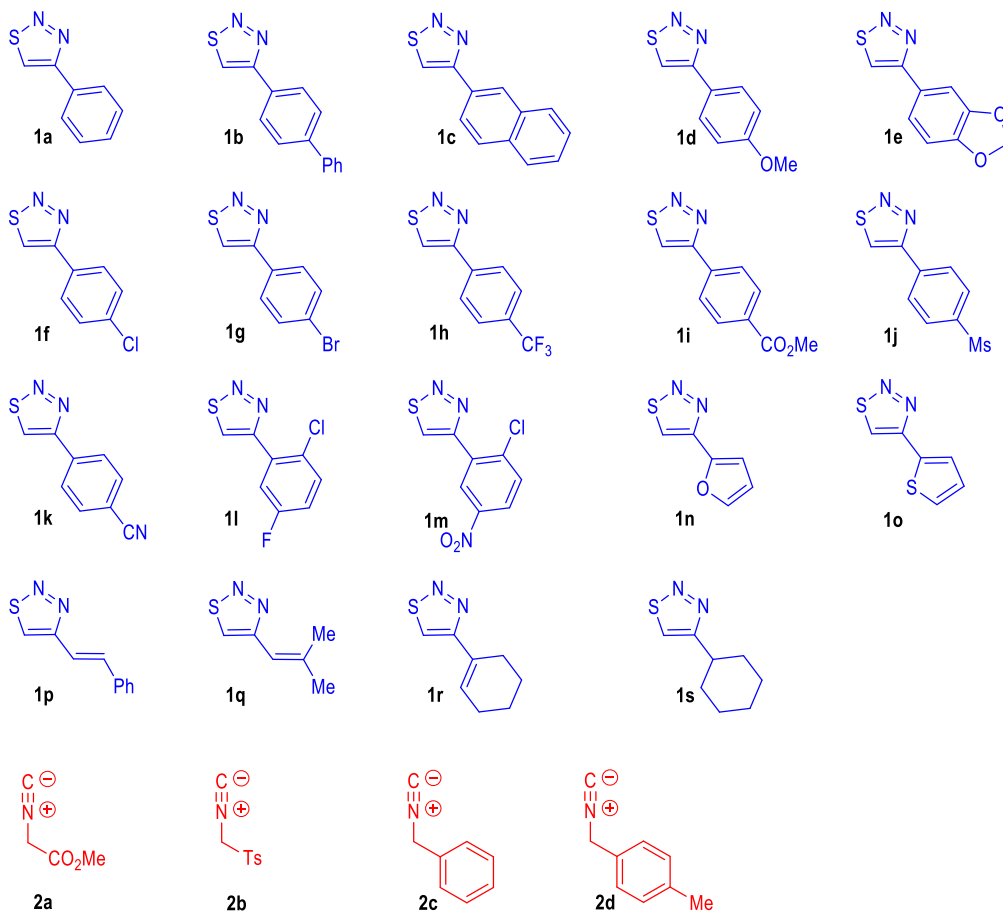

## 3 General procedure

### 3.1 Syntheses of substrates 1

#### 3.1.1 Synthesis of 1,2,3-thiadiazole 11

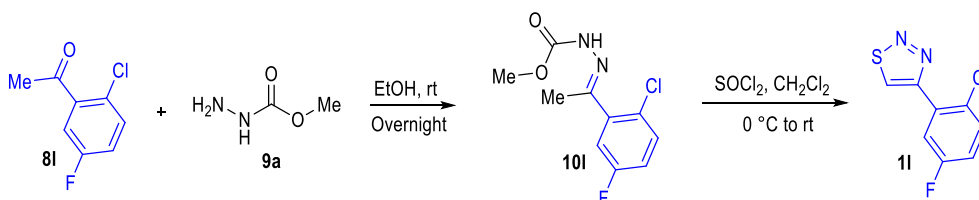

To a 100 ml round bottom flask equipped with a stir bar, 1-(2-chloro-5-fluorophenyl)ethan-1-one **8l** (0.69 mL, 5.0 mmol) was added to a solution of methyl hydrazinecarboxylate **9a** (450.4 mg, 5.0 mmol) in EtOH (20.0 mL) under argon atmosphere. The reaction mixture was stirred at room temperature overnight and then concentrated in *vacuo*. The crude hydrazone **10l** was washed with EtOH, dried in the vacuum and directly used for the next step without further purification. Then, SOCl<sub>2</sub> (0.36 mL, 25.0 mmol) was added dropwise to the solution of hydrazone **10l** (5.0 mmol) in CH<sub>2</sub>Cl<sub>2</sub> (20.0 mL) at 0 °C. The reaction mixture was stirred at room temperature overnight. After the reaction was completely transformed by TLC analysis, the mixture was washed with 5% NaHCO<sub>3</sub> solution (10.0 mL×3) and extracted with EtOAc (30.0 mL×3). The combined organic layer was dried over anhydrous Na<sub>2</sub>SO<sub>4</sub> and concentrated in *vacuo*. The crude product was purified by column chromatography (PE:EA = 30:1) to afford 1,2,3-thiadiazole **11**<sup>1</sup> (837.1 mg, 78% for two steps).

#### 3.1.2 Synthesis of 1,2,3-thiadiazole 1p

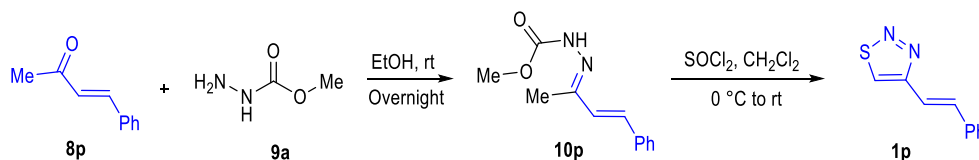

To a 100 ml round bottom flask equipped with a stir bar, (E)-4-phenylbut-3-en-2-one **8p** (731.0 mg, 5.0 mmol) was added to a solution of methyl hydrazinecarboxylate **9a** (450.4 mg, 5.0 mmol) in EtOH (20.0 mL) under argon atmosphere. The reaction mixture was stirred at room temperature overnight

and then concentrated in *vacuo*. The crude hydrazone **10p** was washed with EtOH, dried in the vacuum and used for the next step without further purification. Then, SOCl<sub>2</sub> (0.36 mL, 25.0 mmol) was added dropwise to the solution of hydrazone **10p** (5.0 mmol) in CH<sub>2</sub>Cl<sub>2</sub> (20.0 mL) at 0 °C. The reaction mixture was stirred at room temperature overnight. After the reaction was completely transformed by TLC analysis, the mixture was washed with 5% NaHCO<sub>3</sub> solution (10.0 mL×3) and extracted with EtOAc (30.0 mL×3). The combined organic layer was dried over anhydrous Na<sub>2</sub>SO<sub>4</sub> and concentrated in *vacuo*. The crude product was purified by column chromatography (PE:EA = 30:1) to afford 1,2,3-thiadiazole **1p**<sup>1</sup> (677.7 mg, 72% for two steps).

### 3.1.3 Synthesis of 1,2,3-thiadiazole **1q**

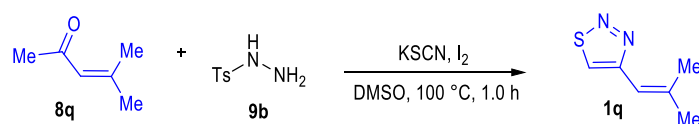

To a 100 ml round bottom flask equipped with a stir bar, 4-methylpent-3-en-2-one **8q** (0.57 mL, 5.0 mmol) was added to a solution of *p*-toluenesulfonyl hydrazide **9b** (931.2 mg, 5.0 mmol) in DMSO (20.0 mL) under argon atmosphere. Then, KSCN (485.9 mg, 5.0 mmol) and I<sub>2</sub> (2.54 g, 10.0 mmol) were added at room temperature. The resulting mixture was stirred at 100 °C for 1.0 h. After the reaction was completely transformed by TLC analysis, the mixture was quenched with saturated Na<sub>2</sub>S<sub>2</sub>O<sub>3</sub> solution (50.0 mL) and extracted with EtOAc (50.0 mL×3). The combined organic layer was washed with brine, dried over anhydrous Na<sub>2</sub>SO<sub>4</sub> and concentrated in *vacuo*. The crude product was purified by column chromatography (PE:EA = 100:1) to offer 1,2,3-thiadiazole **1q**<sup>2</sup> (441.8 mg, 63%).

### 3.1.4 Synthesis of 1,2,3-thiadiazole **1r**

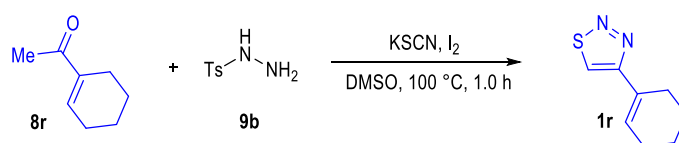

To a 100 ml round bottom flask equipped with a stir bar, 1-(cyclohex-1-en-1-yl)ethan-1-one **8r** (0.6 mL, 5.0 mmol) was added to a solution of

*p*-toluenesulfonyl hydrazide **9b** (931.2 mg, 5.0 mmol) in DMSO (20.0 mL) under argon atmosphere. Then, KSCN (485.9 mg, 5.0 mmol) and I<sub>2</sub> (2.54 g, 10.0 mmol) were added at room temperature. The resulting mixture was stirred at 100 °C for 1.0 h. After the reaction was completely transformed by TLC analysis, the mixture was quenched with saturated Na<sub>2</sub>S<sub>2</sub>O<sub>3</sub> solution (50.0 mL) and extracted with EtOAc (50.0 mL×3). The combined organic layer was washed with brine, dried over anhydrous Na<sub>2</sub>SO<sub>4</sub> and concentrated in *vacuo*. The crude product was purified by column chromatography (PE:EA = 75:1) to offer 1,2,3-thiadiazole **1r**<sup>2</sup> (465.5 mg, 56%).

## 3.2 Syntheses of thiazole products 3

### 3.2.1 General Procedure A

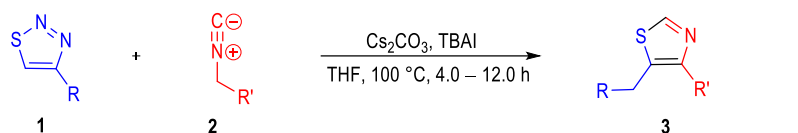

To a 10 mL flame dried sealed tube equipped with a stir bar, 1,2,3-thiadiazoles **1** (0.20 mmol), Cs<sub>2</sub>CO<sub>3</sub> (0.15 mmol) and TBAI (10 mmol%) were added in anhydrous THF (1.0 mL) under argon atmosphere, and isonitriles **2** (0.10 mmol, 1.0 eq.) was added dropwise into the mixture. Then, the resulting mixture was stirred at 100 °C. After isonitrile was completely consumed by TLC analysis, the residue was directly concentrated in *vacuo* and purified by column chromatography (PE:EA = 5:1) to afford the desired product **3** (**3a–3g**, **3n–3o**, **3s–3t**).

### 3.2.2 General Procedure B

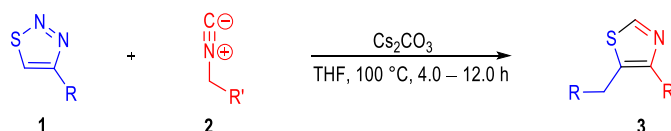

To a 10 mL flame dried sealed tube equipped with a stir bar, 1,2,3-thiadiazoles **1** (0.20 mmol) and Cs<sub>2</sub>CO<sub>3</sub> (0.15 mmol) were added in anhydrous THF (1.0 mL) under argon atmosphere, and isonitriles **2** (0.10 mmol, 1.0 eq.) was added dropwise into the mixture. Then, the resulting mixture was stirred at 100 °C. After isonitrile was

completely consumed by TLC analysis, the residue was directly concentrated in *vacuo* and purified by column chromatography (PE:EA = 5:1) to afford the desired product **3** (**3h–3m**, **3p–3r**).

### 3.3 Synthetic transformations and applications

#### 3.3.1 Gram-scale synthesis of **3g**

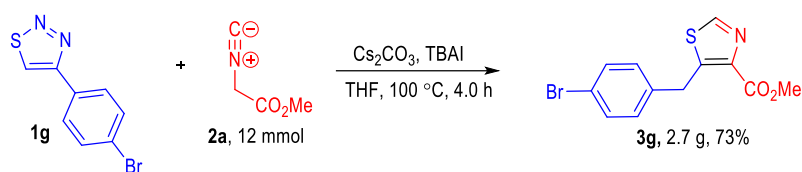

To a 100 ml round bottom flask equipped with a stir bar, 1,2,3-thiadiazole **1g** (5.76 g, 24.0 mmol) and TBAI (443.0 mg, 1.2 mmol) were added in anhydrous THF under argon atmosphere,  $\text{Cs}_2\text{CO}_3$  (5.86 g, 18.0 mmol) was added batches, and methyl isocyanoacetate **2a** (1.1 mL, 12.0 mmol) was added dropwise into the mixture. Then, the resulting mixture was stirred at 100 °C for 4.0 h. After isonitrile was completely consumed by TLC analysis, the residue was directly concentrated in *vacuo* and purified by column chromatography (PE:EA = 5:1) to afford the desired product **3g** (2.7 g, 73%).

#### 3.3.2 The reduction of **3g**

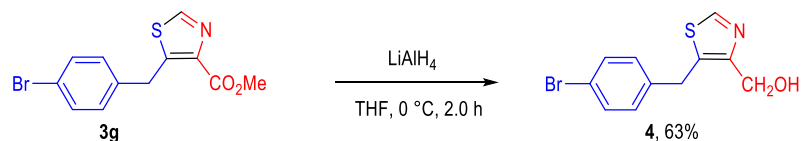

To a 10 mL flame dried test tube equipped with a stir bar, the solution of 1,2,3-thiadiazole **3g** (31.2 mg, 0.1 mmol) in anhydrous THF (0.5 mL) was added to a suspension of  $\text{LiAlH}_4$  (7.6 mg, 0.2 mmol) in anhydrous THF (0.5 mL) under argon atmosphere at 0 °C. After the substrate was completely consumed by TLC analysis, the reaction system was slowly quenched with EtOAc at 0 °C. Then, water was added to the mixture and the aqueous phase was extracted with EtOAc. The combined organic layer was dried over anhydrous  $\text{Na}_2\text{SO}_4$  and concentrated in *vacuo*. Finally, the residue purified by column chromatography (PE:EA = 1:1) to afford the desired

product **4**<sup>5</sup> (16.7 mg, 63%).

### 3.3.3 The Suzuki coupling reaction of **3g**

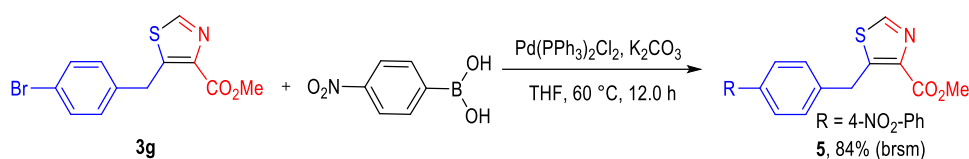

To a 10 mL flame dried test tube equipped with a stir bar, 1,2,3-thiadiazole **3g** (31.2 mg, 0.1 mmol), 4-nitrophenylboronic acid (25.0 mg, 0.15 mmol), Pd(PPh<sub>3</sub>)<sub>2</sub>Cl<sub>2</sub> (1.5 mg, 2 mmol%) and K<sub>2</sub>CO<sub>3</sub> (27.6 mg, 0.2 mmol) were added in anhydrous THF (1.0 mL) at 60 °C under argon atmosphere. After stirring for about 12.0 h, the residue was directly concentrated in *vacuo* and purified by column chromatography (PE:EA = 3:1) to afford the desired product **5** (21.7 mg, 84%, brsm).

### 3.3.4 Synthesis of bioactive compound **7**

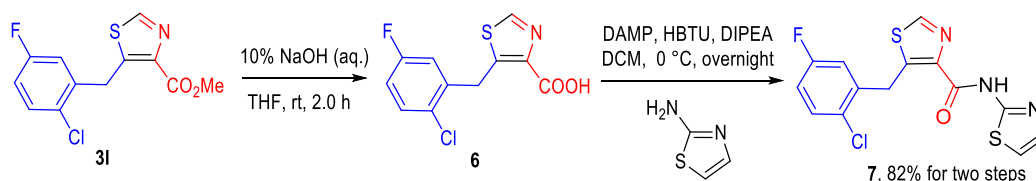

To a stirred solution of thiazole **3l** (285.7 mg, 1.0 mmol) in THF (10.0 mL), 10% NaOH aqueous solution (1.0 mL) was added at rt. After the reaction was completely transformed by TLC analysis, HCl (5.0 M) was added until pH = 3.0. The aqueous phase was extracted with DCM (20.0 mL×3). The combined organic layer was washed with brine (20.0 mL×3), dried over anhydrous Na<sub>2</sub>SO<sub>4</sub>, and concentrated in *vacuo*. The crude product **6** was directly used without further purification.

HBTU (455.1 mg, 1.2 mmol), DIPEA (0.36 mL, 2.2 mmol) and 4-DMAP (24.4 mg, 0.2 mmol) were added to a stirred solution of the amine (100.1 mg, 1.0 mmol) and acid **6** (1.0 mmol) under argon atmosphere in dry DCM at 0 °C. The resulting mixture was stirred at rt overnight. Then the mixture was filtered through celite, washed with CHCl<sub>3</sub> and evaporated in *vacuo*. The crude was redissolved in DCM, washed with 5% HCl and then with saturated solution of NaHCO<sub>3</sub>, dried over anhydrous Na<sub>2</sub>SO<sub>4</sub> and evaporated in *vacuo*. The crude product was purified by flash chromatography to obtain amide **7**<sup>6,7</sup> (289.3 mg, 82% for two steps).



## 4 Characterization data for compounds

### 4-(2-chloro-5-fluorophenyl)-1,2,3-thiadiazole (**1l**)

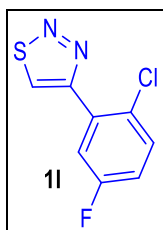

White amorphous solid. **<sup>1</sup>H NMR (500 MHz, CDCl<sub>3</sub>)** δ 8.89 (s, 1H), 7.98 – 7.95 (m, 1H), 7.13 – 7.11 (m, 1H), 7.02 – 6.99 (m, 1H); **<sup>13</sup>C NMR (125 MHz, CDCl<sub>3</sub>)** δ 163.3, 161.3, 157.9, 134.4, 132.9 (d, *J* = 35.5 Hz), 125.8 (d, *J* = 15.0 Hz), 117.6 (d, *J* = 99.5 Hz), 114.6 (d, *J* = 84.0 Hz); **<sup>19</sup>F NMR (564 MHz, CDCl<sub>3</sub>)** δ – 109.5 (q, *J* = 7.3 Hz, 1F); **IR (cm<sup>-1</sup>):** ν 3456, 3120, 1605, 1463, 1260, 1207, 889, 856, 786; **HRMS:** *m/z*: [M + H]<sup>+</sup> calculated for C<sub>8</sub>H<sub>5</sub>ClFN<sub>2</sub>S<sup>+</sup>, 214.9841, found 214.9836.

### (*E*)-4-styryl-1,2,3-thiadiazole (**1p**)

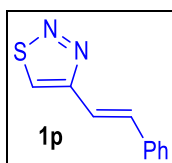

Yellow amorphous solid. **<sup>1</sup>H NMR (500 MHz, CDCl<sub>3</sub>)** δ 8.24 (s, 1H), 7.59 – 7.55 (m, 1H), 7.43 (d, *J* = 7.0 Hz, 2H), 7.30 – 7.25 (m, 3H), 7.21 (d, *J* = 7.0 Hz, 1H); **<sup>13</sup>C NMR (125 MHz, CDCl<sub>3</sub>)** δ 161.0, 135.9, 134.4, 130.3, 128.7, 128.5, 126.8, 116.9; **IR (cm<sup>-1</sup>):** ν 3464, 3070, 2923, 1638, 1497, 1242, 961, 754, 694; **HRMS:** *m/z*: [M + H]<sup>+</sup> calculated for C<sub>10</sub>H<sub>9</sub>N<sub>2</sub>S<sup>+</sup>, 189.0481, found 189.0477.

### 4-(2-methylprop-1-en-1-yl)-1,2,3-thiadiazole (**1q**)

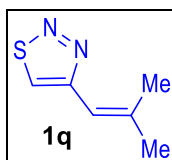

Yellow oil. **<sup>1</sup>H NMR (500 MHz, CDCl<sub>3</sub>)** δ 8.15 (s, 1H), 6.57 (s, 1H), 2.00 (s, 3H), 1.94 (s, 3H); **<sup>13</sup>C NMR (125 MHz, CDCl<sub>3</sub>)** δ 160.7, 141.6, 130.9, 114.5, 27.0, 20.4;

---

**IR (cm<sup>-1</sup>):**  $\nu$  3449, 2962, 1701, 1384, 1261, 1095, 1023, 803; **HRMS:**  $m/z$ : [M + H]<sup>+</sup> calculated for C<sub>6</sub>H<sub>9</sub>N<sub>2</sub>S<sup>+</sup>, 141.0481, found 141.0477.

4-(cyclohex-1-en-1-yl)-1,2,3-thiadiazole (**1r**)

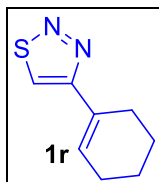

Yellow oil. **<sup>1</sup>H NMR (500 MHz, CDCl<sub>3</sub>)**  $\delta$  8.11 (s, 1H), 6.90 – 6.89 (m, 1H), 2.46 – 2.44 (m, 2H), 2.24 – 2.21 (m, 2H), 1.79 – 1.74 (m, 2H), 1.67 – 1.62 (m, 2H); **<sup>13</sup>C NMR (125 MHz, CDCl<sub>3</sub>)**  $\delta$  164.1, 129.4, 127.7, 127.4, 26.6, 25.1, 22.0, 21.5; **IR (cm<sup>-1</sup>):**  $\nu$  3425, 2930, 1650, 1449, 1225, 1077, 891, 571; **HRMS:**  $m/z$ : [M + H]<sup>+</sup> calculated for C<sub>8</sub>H<sub>11</sub>N<sub>2</sub>S<sup>+</sup>, 167.0637, found 167.0634.

(isocyanomethyl)benzene (**2c**)

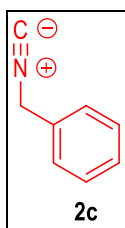

Yellow oil. **<sup>1</sup>H NMR (500 MHz, CDCl<sub>3</sub>)**  $\delta$  7.31 – 7.28 (m, 2H), 7.26 – 7.22 (m, 3H), 4.51 (s, 2H).<sup>8</sup>

1-(isocyanomethyl)-4-methylbenzene (**2d**)

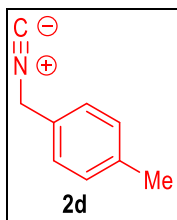

Yellow oil. **<sup>1</sup>H NMR (500 MHz, CDCl<sub>3</sub>)**  $\delta$  7.08 (d,  $J$  = 8.0 Hz, 2H), 7.05 (d,  $J$  = 8.0 Hz, 2H), 4.40 (s, 2H), 2.22 (s, 3H).<sup>4</sup>

methyl 5-benzylthiazole-4-carboxylate (**3a**)

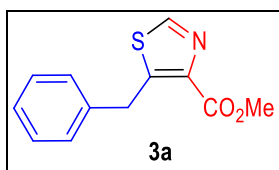

Compound **3a** as a white amorphous solid (21.4 mg) was obtained *via the General Procedure A* in 92% yield. **<sup>1</sup>H NMR (500 MHz, CDCl<sub>3</sub>)** δ 8.53 (s, 1H), 7.27 – 7.24 (m, 2H), 7.21 – 7.18 (m, 3H), 4.55 (s, 2H), 3.91 (s, 3H); **<sup>13</sup>C NMR (125 MHz, CDCl<sub>3</sub>)** δ 162.8, 150.3, 150.2, 141.1, 139.1, 128.8, 128.7, 127.1, 52.3, 33.3; **IR (cm<sup>-1</sup>):** ν 3423, 2925, 1717, 1440, 1327, 1269, 1156, 1009, 703; **HRMS:** m/z: [M + H]<sup>+</sup> calculated for C<sub>12</sub>H<sub>12</sub>NO<sub>2</sub>S<sup>+</sup>, 234.0583, found 234.0578.

methyl 5-([1,1'-biphenyl]-4-ylmethyl) thiazole-4-carboxylate (**3b**)

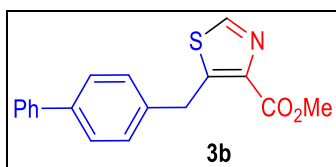

Compound **3b** as a yellow amorphous solid (22.1 mg) was obtained *via the General Procedure A* in 71% yield. **<sup>1</sup>H NMR (500 MHz, CDCl<sub>3</sub>)** δ 8.55 (s, 1H), 7.50 (d, *J* = 8.5 Hz, 2H), 7.48 (d, *J* = 8.5 Hz, 2H), 7.37 – 7.34 (m, 3H), 7.28 – 7.26 (m, 3H), 4.58 (s, 2H), 3.91 (s, 3H); **<sup>13</sup>C NMR (125 MHz, CDCl<sub>3</sub>)** δ 162.8, 150.3, 150.0, 141.1, 140.6, 140.0, 138.1, 129.1, 128.7, 127.5, 127.3, 127.0, 52.3, 32.9; **IR (cm<sup>-1</sup>):** ν 2925, 2360, 1704, 1653, 1507, 1457, 1319, 737, 668; **HRMS:** m/z: [M + Na]<sup>+</sup> calculated for C<sub>18</sub>H<sub>15</sub>NNaO<sub>2</sub>S<sup>+</sup>, 332.0716, found 332.0711.

methyl 5-(naphthalen-1-ylmethyl) thiazole-4-carboxylate (**3c**)

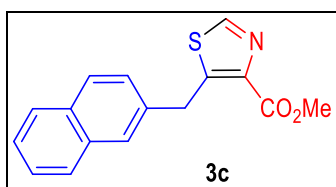

Compound **3c** as a white amorphous solid (24.2 mg) was obtained *via the General Procedure A* in 86% yield. **<sup>1</sup>H NMR (500 MHz, CDCl<sub>3</sub>)** δ 8.53 (s, 1H), 7.73 (q, *J* = 7.0 Hz, 3H), 7.64 (s, 1H), 7.42 – 7.37 (m, 2H), 7.32 – 7.30 (m, 1H), 4.70 (s, 2H), 3.92

(s, 3H);  $^{13}\text{C}$  NMR (125 MHz,  $\text{CDCl}_3$ )  $\delta$  162.8, 150.4, 150.1, 141.2, 136.6, 133.5, 132.4, 128.6, 127.7, 127.7, 127.2, 126.9, 126.3, 125.9, 52.3, 33.5; IR ( $\text{cm}^{-1}$ ):  $\nu$  2924, 2360, 1717, 1653, 1507, 1457, 752, 668; HRMS:  $m/z$ :  $[\text{M} + \text{H}]^+$  calculated for  $\text{C}_{16}\text{H}_{14}\text{NO}_2\text{S}^+$ , 284.0740, found 284.0732.

methyl 5-(4-methoxybenzyl) thiazole-4-carboxylate (**3d**)

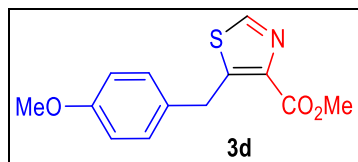

Compound **3d** as a white amorphous solid (24.8 mg) was obtained *via the General Procedure A* in 94% yield.  $^1\text{H}$  NMR (500 MHz,  $\text{CDCl}_3$ )  $\delta$  8.51 (s, 1H), 7.12 (d,  $J = 8.0$  Hz, 2H), 6.78 (d,  $J = 8.0$  Hz, 2H), 4.46 (s, 2H), 3.89 (s, 3H), 3.71 (s, 3H);  $^{13}\text{C}$  NMR (125 MHz,  $\text{CDCl}_3$ )  $\delta$  162.7, 158.6, 151.1, 150.1, 140.7, 131.2, 129.7, 114.1, 55.1, 52.1, 32.5; IR ( $\text{cm}^{-1}$ ):  $\nu$  3069, 2360, 1715, 1515, 1438, 1270, 1152, 837; HRMS:  $m/z$ :  $[\text{M} + \text{Na}]^+$  calculated for  $\text{C}_{13}\text{H}_{13}\text{NNaO}_3\text{S}^+$ , 286.0508, found 286.0506.

methyl 5-(benzo[*d*] [1,3] dioxol-4-ylmethyl) thiazole-4-carboxylate (**3e**)

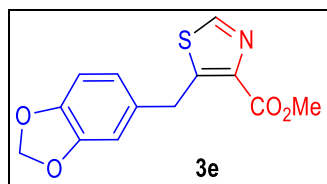

Compound **3e** as a yellow amorphous solid (24.6 mg) was obtained *via the General Procedure A* in 89% yield.  $^1\text{H}$  NMR (500 MHz,  $\text{CDCl}_3$ )  $\delta$  8.53 (s, 1H), 6.70 – 6.66 (m, 3H), 5.88 (s, 2H), 4.44 (s, 2H), 3.91 (s, 3H);  $^{13}\text{C}$  NMR (125 MHz,  $\text{CDCl}_3$ )  $\delta$  162.8, 150.6, 150.3, 147.9, 146.6, 140.9, 132.9, 121.8, 109.2, 108.4, 101.1, 52.3, 33.0; IR ( $\text{cm}^{-1}$ ):  $\nu$  3087, 2917, 2360, 1709, 1440, 1250, 1038, 810; HRMS:  $m/z$ :  $[\text{M} + \text{H}]^+$  calculated for  $\text{C}_{13}\text{H}_{12}\text{NO}_4\text{S}^+$ , 278.0482, found 278.0477.

methyl 5-(4-chlorobenzyl) thiazole-4-carboxylate (**3f**)

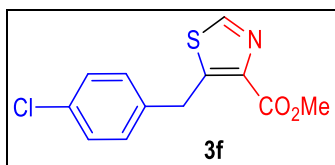

Compound **3f** as a yellow amorphous solid (23.8 mg) was obtained *via the General Procedure A* in 89% yield. **<sup>1</sup>H NMR (500 MHz, CDCl<sub>3</sub>)** δ 8.55 (s, 1H), 7.22 (d, *J* = 8.5 Hz, 2H), 7.14 (d, *J* = 8.5 Hz, 2H), 4.51 (s, 2H), 3.90 (s, 3H); **<sup>13</sup>C NMR (125 MHz, CDCl<sub>3</sub>)** δ 162.7, 150.4, 149.2, 141.2, 137.5, 133.0, 130.0, 128.9, 52.3, 32.5; **IR (cm<sup>-1</sup>):** ν 3061, 2951, 1713, 1508, 1494, 1355, 1172, 854, 782; **HRMS:** *m/z*: [M + H]<sup>+</sup> calculated for C<sub>12</sub>H<sub>11</sub>ClNO<sub>2</sub>S<sup>+</sup>, 268.0194, found 268.0187.

methyl 5-(4-bromobenzyl)thiazole-4-carboxylate (**3g**)

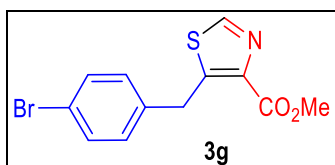

Compound **3g** as a yellow amorphous solid (28.8 mg) was obtained *via the General Procedure A* in 92% yield. **<sup>1</sup>H NMR (500 MHz, CDCl<sub>3</sub>)** δ 8.55 (s, 1H), 7.38 – 7.35 (m, 2H), 7.09 – 7.06 (m, 2H), 4.49 (s, 2H), 3.89 (s, 3H); **<sup>13</sup>C NMR (125 MHz, CDCl<sub>3</sub>)** δ 162.6, 150.4, 149.0, 141.2, 138.0, 131.9, 130.3, 121.0, 52.3, 32.5; **IR (cm<sup>-1</sup>):** ν 3105, 2942, 1712, 1509, 1488, 1334, 1170, 855, 777; **HRMS:** *m/z*: [M + Na]<sup>+</sup> calculated for C<sub>12</sub>H<sub>10</sub>BrNNaO<sub>2</sub>S<sup>+</sup>, 333.9508, found 333.9501.

methyl 5-(4-(trifluoromethyl)benzyl)thiazole-4-carboxylate (**3h**)

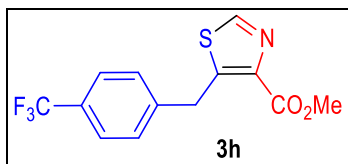

Compound **3h** as a white solid (22.4 mg) was obtained *via the General Procedure B* in 74% yield. **m.p.:** 73.0 – 75.2 °C. **<sup>1</sup>H NMR (500 MHz, CDCl<sub>3</sub>)** δ 8.57 (s, 1H), 7.50 (d, *J* = 8.0 Hz, 2H), 7.31 (d, *J* = 8.0 Hz, 2H), 4.61 (s, 2H), 3.90 (s, 3H); **<sup>13</sup>C NMR (125 MHz, CDCl<sub>3</sub>)** δ 162.6, 150.5, 148.0, 142.8, 141.5, 129.3 (q, *J* = 7.5 Hz), 128.9, 125.7 (q, *J* = 14.5 Hz), 124.0 (q, *J* = 1082.0 Hz), 52.3, 32.8; **<sup>19</sup>F NMR (564 MHz, CDCl<sub>3</sub>)** δ – 62.6 (s, 3F); **IR (cm<sup>-1</sup>):** ν 3102, 1715, 1327, 1443, 1169, 1121, 1066, 860,

---

777; **HRMS**: m/z: [M + Na]<sup>+</sup> calculated for C<sub>13</sub>H<sub>10</sub>F<sub>3</sub>NNaO<sub>2</sub>S<sup>+</sup>, 324.0277, found 324.0266.

methyl 5-(4-(methoxycarbonyl) benzyl) thiazole-4-carboxylate (**3i**)

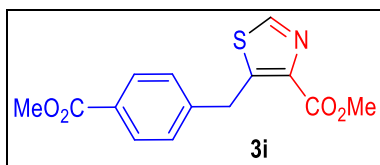

Compound **3i** as a yellow amorphous solid (19.4 mg) was obtained *via the General Procedure B* in 67% yield. **<sup>1</sup>H NMR (500 MHz, CDCl<sub>3</sub>)** δ 8.57 (s, 1H), 7.92 (d, *J* = 8.0 Hz, 2H), 7.27 (d, *J* = 8.0 Hz, 2H), 4.61 (s, 2H), 3.90 (s, 3H), 3.83 (s, 3H); **<sup>13</sup>C NMR (125 MHz, CDCl<sub>3</sub>)** δ 166.7, 162.6, 150.5, 148.4, 144.1, 141.5, 130.1, 129.0, 128.7, 52.3, 52.1, 33.1; **IR (cm<sup>-1</sup>)**: ν 3070, 2951, 1724, 1436, 1268, 1153, 1110, 857, 728; **HRMS**: m/z: [M + Na]<sup>+</sup> calculated for C<sub>14</sub>H<sub>13</sub>NNaO<sub>4</sub>S<sup>+</sup>, 314.0457, found 314.0451.

methyl 5-(4-(methylsulfonyl) benzyl) thiazole-4-carboxylate (**3j**)

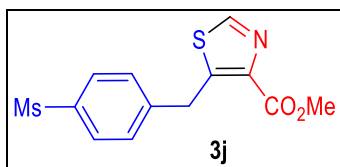

Compound **3j** as a yellow amorphous solid (21.8 mg) was obtained *via the General Procedure B* in 70% yield. **<sup>1</sup>H NMR (500 MHz, CDCl<sub>3</sub>)** δ 8.61 (s, 1H), 7.82 (d, *J* = 7.5 Hz, 2H), 7.41 (d, *J* = 7.5 Hz, 2H), 4.66 (s, 2H), 3.91 (s, 3H), 2.98 (s, 3H); **<sup>13</sup>C NMR (125 MHz, CDCl<sub>3</sub>)** δ 162.6, 150.7, 147.1, 145.1, 141.8, 139.3, 129.5, 127.9, 52.4, 44.5, 32.7; **IR (cm<sup>-1</sup>)**: ν 3078, 2360, 1717, 1519, 1439, 1297, 1147, 1013, 752; **HRMS**: m/z: [M + H]<sup>+</sup> calculated for C<sub>13</sub>H<sub>14</sub>NO<sub>4</sub>S<sub>2</sub><sup>+</sup>, 312.0359, found 312.0358.

methyl 5-(4-cyanobenzyl) thiazole-4-carboxylate (**3k**)

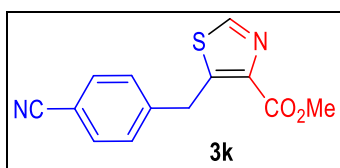

Compound **3k** as a yellow oil (13.2 mg) was obtained *via the General Procedure B* in

51% yield. **<sup>1</sup>H NMR (500 MHz, CDCl<sub>3</sub>)** δ 8.61 (s, 1H), 7.55 (d, *J* = 8.0 Hz, 2H), 7.32 (d, *J* = 8.0 Hz, 2H), 4.62 (s, 2H), 3.90 (s, 3H); **<sup>13</sup>C NMR (125 MHz, CDCl<sub>3</sub>)** δ 162.6, 150.7, 147.1, 144.2, 141.8, 132.6, 129.4, 118.6, 111.1, 52.4, 32.9; **IR (cm<sup>-1</sup>):** ν 3079, 2360, 2227, 1717, 1506, 1446, 1264, 1144, 997, 787; **HRMS:** *m/z*: [M + Na]<sup>+</sup> calculated for C<sub>13</sub>H<sub>10</sub>N<sub>2</sub>NaO<sub>2</sub>S<sup>+</sup>, 281.0355, found 281.0347.

methyl 5-(2-chloro-5-fluorobenzyl) thiazole-4-carboxylate (**3l**)

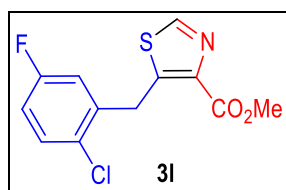

Compound **3l** as a yellow amorphous solid (20.6 mg) was obtained *via the General Procedure B* in 72% yield. **<sup>1</sup>H NMR (500 MHz, CDCl<sub>3</sub>)** δ 8.55 (s, 1H), 7.23 – 7.20 (m, 1H), 7.10 – 7.08 (m, 1H), 6.90 – 6.86 (m, 1H), 4.63 (s, 2H), 3.91 (s, 3H); **<sup>13</sup>C NMR (125 MHz, CDCl<sub>3</sub>)** δ 162.7, 162.6, 160.7, 150.4, 148.2, 141.5, 134.4 (d, *J* = 40.5 Hz), 133.0 (d, *J* = 14.5 Hz), 131.6 (d, *J* = 34.5 Hz), 117.1 (d, *J* = 98.5 Hz), 114.5 (d, *J* = 84.0 Hz), 52.3, 30.3; **IR (cm<sup>-1</sup>):** ν 3083, 2360, 1714, 1489, 1297, 1199, 1016, 849; **<sup>19</sup>F NMR (564 MHz, CDCl<sub>3</sub>)** δ – 112.6 (q, *J* = 7.3 Hz, 1F); **HRMS:** *m/z*: [M + H]<sup>+</sup> calculated for C<sub>12</sub>H<sub>10</sub>ClFNO<sub>2</sub>S<sup>+</sup>, 286.0099, found 286.0095.

methyl 5-(2-chloro-5-nitrobenzyl) thiazole-4-carboxylate (**3m**)

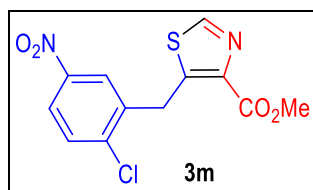

Compound **3m** as a white amorphous solid (19.0 mg) was obtained *via the General Procedure B* in 61% yield. **<sup>1</sup>H NMR (500 MHz, CDCl<sub>3</sub>)** δ 8.63 (s, 1H), 8.09 (s, 1H), 8.04 (d, *J* = 9.0 Hz, 1H), 7.53 (d, *J* = 9.0 Hz, 1H), 4.78 (s, 2H), 3.93 (s, 3H); **<sup>13</sup>C NMR (125 MHz, CDCl<sub>3</sub>)** δ 162.6, 150.9, 146.8, 145.4, 142.3, 140.7, 138.7, 130.7, 125.4, 123.5, 52.5, 30.8; **IR (cm<sup>-1</sup>):** ν 3083, 2360, 2341, 1713, 1513, 1348, 1271, 1046, 668; **HRMS:** *m/z*: [M + H]<sup>+</sup> calculated for C<sub>12</sub>H<sub>10</sub>ClN<sub>2</sub>O<sub>4</sub>S<sup>+</sup>, 313.0044, found

313.0036.

methyl 5-(furan-2-ylmethyl) thiazole-4-carboxylate (**3n**)

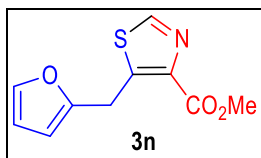

Compound **3n** as a yellow oil (12.2 mg) was obtained *via the General Procedure A* in 55% yield. **<sup>1</sup>H NMR (500 MHz, CDCl<sub>3</sub>)** δ 8.58 (s, 1H), 7.29 (s, 1H), 6.26 – 6.25 (m, 1H), 6.12 – 6.11 (m, 1H), 4.59 (s, 2H), 3.90 (s, 3H); **<sup>13</sup>C NMR (125 MHz, CDCl<sub>3</sub>)** δ 162.7, 151.7, 150.5, 146.6, 142.0, 141.4, 110.5, 107.2, 52.3, 26.2; **IR (cm<sup>-1</sup>):** ν 2923, 2360, 1716, 1683, 1653, 1559, 1540, 1507, 1457, 668; **HRMS:** m/z: [M + H]<sup>+</sup> calculated for C<sub>10</sub>H<sub>10</sub>NO<sub>3</sub>S<sup>+</sup>, 224.0376, found 224.0371.

methyl 5-(thiophen-2-ylmethyl) thiazole-4-carboxylate (**3o**)

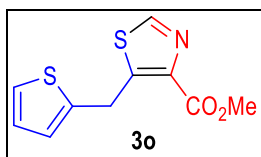

Compound **3o** as a yellow oil (14.8 mg) was obtained *via the General Procedure A* in 62% yield. **<sup>1</sup>H NMR (500 MHz, CDCl<sub>3</sub>)** δ 8.55 (s, 1H), 7.14 – 7.12 (m, 1H), 6.89 – 6.88 (m, 2H), 4.74 (s, 2H), 3.91 (s, 3H); **<sup>13</sup>C NMR (125 MHz, CDCl<sub>3</sub>)** δ 162.6, 150.4, 149.4, 141.0, 127.0, 126.2, 124.8, 52.3, 27.5; **IR (cm<sup>-1</sup>):** ν 2924, 2360, 1717, 1683, 1653, 1559, 1507, 1457, 668; **HRMS:** m/z: [M + Na]<sup>+</sup> calculated for C<sub>10</sub>H<sub>9</sub>NNaO<sub>2</sub>S<sub>2</sub><sup>+</sup>, 261.9967, found 261.9962.

methyl 5-cinnamylthiazole-4-carboxylate (**3p**)

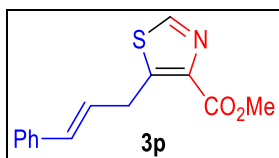

Compound **3p** as a yellow oil (16.6 mg) was obtained *via the General Procedure B* in 64% yield. **<sup>1</sup>H NMR (500 MHz, CDCl<sub>3</sub>)** δ 8.57 (s, 1H), 7.30 (d, *J* = 7.0 Hz, 2H), 7.26 – 7.23 (m, 2H), 7.19 – 7.5 (m, 1H), 6.49 (d, *J* = 15.5 Hz, 1H), 6.31 – 6.27 (m, 1H),



4.11 (d,  $J = 7.0$  Hz, 2H), 3.90 (s, 3H);  $^{13}\text{C}$  NMR (125 MHz,  $\text{CDCl}_3$ )  $\delta$  162.7, 150.1, 149.1, 141.0, 136.6, 132.9, 128.6, 127.7, 126.3, 126.2, 52.2, 30.8; IR ( $\text{cm}^{-1}$ ):  $\nu$  2924, 2360, 1716, 1653, 1559, 1541, 1507, 1457, 668; HRMS:  $m/z$ :  $[\text{M} + \text{H}]^+$  calculated for  $\text{C}_{14}\text{H}_{14}\text{NO}_2\text{S}^+$ , 260.0740, found 260.0735.

methyl 5-(3-methylbut-2-en-1-yl) thiazole-4-carboxylate (**3q**)

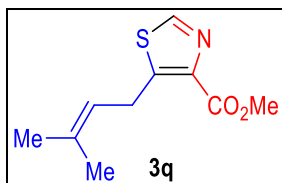

Compound **3q** as a yellow oil (13.2 mg) was obtained *via the General Procedure B* in 62% yield.  $^1\text{H}$  NMR (500 MHz,  $\text{CDCl}_3$ )  $\delta$  8.52 (s, 1H), 5.35 – 5.31 (m, 1H), 3.89 (s, 3H), 3.89 (s, 2H), 1.70 (s, 3H), 1.64 (s, 3H);  $^{13}\text{C}$  NMR (125 MHz,  $\text{CDCl}_3$ )  $\delta$  162.8, 151.5, 149.6, 140.4, 135.6, 121.1, 52.1, 26.4, 25.5, 17.9; IR ( $\text{cm}^{-1}$ ):  $\nu$  2926, 1717, 1440, 1328, 1267, 1201, 1156, 785; HRMS:  $m/z$ :  $[\text{M} + \text{H}]^+$  calculated for  $\text{C}_{10}\text{H}_{14}\text{NO}_2\text{S}^+$ , 212.0740, found 212.0735.

methyl 5-(cyclohex-1-en-1-ylmethyl) thiazole-4-carboxylate (**3r**)

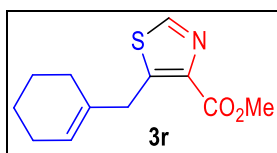

Compound **3r** as a yellow oil (12.6 mg) was obtained *via the General Procedure B* in 53% yield.  $^1\text{H}$  NMR (500 MHz,  $\text{CDCl}_3$ )  $\delta$  8.55 (s, 1H), 5.50 (s, 1H), 4.64 (s, 2H), 3.88 (s, 3H), 3.84 (s, 2H), 1.96 (s, 2H), 1.88 (s, 2H), 1.55 – 1.53 (m, 2H), 1.49 – 1.47 (m, 2H);  $^{13}\text{C}$  NMR (125 MHz,  $\text{CDCl}_3$ )  $\delta$  162.8, 150.1, 150.1, 141.4, 136.0, 124.7, 52.1, 35.4, 28.0, 25.1, 22.7, 22.0; IR ( $\text{cm}^{-1}$ ):  $\nu$  2925, 2360, 1717, 1653, 1559, 1507, 1457, 1437, 668; HRMS:  $m/z$ :  $[\text{M} + \text{H}]^+$  calculated for  $\text{C}_{12}\text{H}_{16}\text{NO}_2\text{S}^+$ , 238.0896, found 238.0893.

methyl 5-(cyclohexylmethyl) thiazole-4-carboxylate (**3s**)

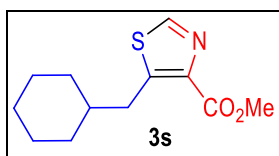

Compound **3s** as a yellow oil (22.2 mg) was obtained *via the General Procedure A* in 93% yield. **<sup>1</sup>H NMR (500 MHz, CDCl<sub>3</sub>)** δ 8.55 (s, 1H), 3.88 (s, 3H), 3.12 – 3.01 (m, 2H), 1.67 – 1.62 (m, 5H), 1.57 – 1.53 (m, 3H), 1.16 – 1.12 (m, 3H); **<sup>13</sup>C NMR (125 MHz, CDCl<sub>3</sub>)** δ 162.7, 149.5, 149.4, 141.5, 52.1, 40.3, 34.4, 32.9, 26.2, 26.0; **IR (cm<sup>-1</sup>):** ν 2924, 2360, 1717, 1653, 1559, 1507, 1457, 1269, 668; **HRMS:** m/z: [M + H]<sup>+</sup> calculated for C<sub>12</sub>H<sub>18</sub>NO<sub>2</sub>S<sup>+</sup>, 240.1053, found 240.1050.

5-benzyl-4-tosylthiazole (**3t**)

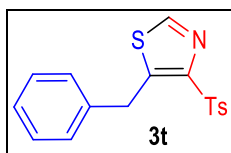

Compound **3t** as a yellow oil (25.4 mg) was obtained *via the General Procedure A* in 77% yield. **<sup>1</sup>H NMR (500 MHz, CDCl<sub>3</sub>)** δ 8.49 (s, 1H), 7.81 (d, *J* = 8.0 Hz, 2H), 7.27 – 7.22 (m, 5H), 7.19 (d, *J* = 8.0 Hz, 2H), 4.60 (s, 2H), 2.34 (s, 3H), 1.70 (s, 3H), 1.64 (s, 3H); **<sup>13</sup>C NMR (125 MHz, CDCl<sub>3</sub>)** δ 151.6, 148.3, 146.6, 144.7, 138.6, 137.6, 129.7, 128.9, 128.8, 128.2, 127.3, 32.4, 21.6; **IR (cm<sup>-1</sup>):** ν 3449, 2924, 1719, 1460, 1378, 1145, 812; **HRMS:** m/z: [M + H]<sup>+</sup> calculated for C<sub>17</sub>H<sub>15</sub>NNaO<sub>2</sub>S<sub>2</sub><sup>+</sup>, 352.0436, found 352.0441.

(5-(4-bromobenzyl) thiazol-4-yl) methanol (**4**)

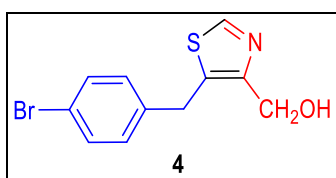

Yellow oil. **<sup>1</sup>H NMR (500 MHz, CDCl<sub>3</sub>)** δ 8.57 (s, 1H), 7.36 (d, *J* = 7.5 Hz, 2H), 7.01 (d, *J* = 7.5 Hz, 2H), 4.69 (s, 2H), 4.07 (s, 2H), 2.83 (s, 1H); **<sup>13</sup>C NMR (125 MHz, CDCl<sub>3</sub>)** δ 152.0, 151.2, 138.2, 133.2, 131.9, 130.0, 120.8, 58.5, 31.3; **IR (cm<sup>-1</sup>):** ν

3290, 2922, 1485, 1408, 1010, 816, 719, 486; **HRMS**:  $m/z$ :  $[M + H]^+$  calculated for  $C_{11}H_{11}BrNOS^+$ , 283.9739, found 283.9737.

methyl 5-((4'-nitro-[1,1'-biphenyl]-4-yl) methyl) thiazole-4-carboxylate (**5**)

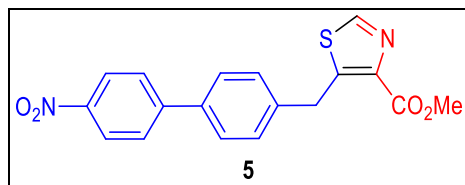

Yellow amorphous solid.  **$^1H$  NMR (500 MHz,  $CDCl_3$ )**  $\delta$  8.56 (s, 1H), 8.18 (d,  $J = 8.0$  Hz, 2H), 7.63 (d,  $J = 8.0$  Hz, 2H), 7.50 (d,  $J = 7.5$  Hz, 2H), 7.32 (d,  $J = 7.5$  Hz, 2H), 4.60 (s, 2H), 3.90 (s, 3H);  **$^{13}C$  NMR (125 MHz,  $CDCl_3$ )**  $\delta$  162.6, 150.4, 148.9, 146.9, 146.9, 141.3, 139.9, 137.4, 129.4, 127.7, 127.5, 124.0, 52.2, 32.7; **IR ( $cm^{-1}$ )**:  $\nu$  3433, 3082, 1705, 1513, 1343, 1204, 1166, 850; **HRMS**:  $m/z$ :  $[M + H]^+$  calculated for  $C_{18}H_{15}N_2O_4S^+$ , 355.0747, found 355.0746.

5-(2-chloro-5-fluorobenzyl)-*N*-(thiazol-2-yl) thiazole-4-carboxamide (**7**)

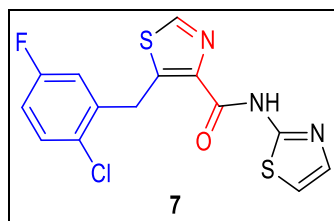

White solid. **m.p.**: 152.3 – 154.5 °C.  **$^1H$  NMR (500 MHz,  $CDCl_3$ )**  $\delta$  10.92 (s, 1H), 8.51 (s, 1H), 7.46 (d,  $J = 3.5$  Hz, 1H), 7.33 – 7.32 (m, 1H), 7.08 – 7.07 (m, 1H), 6.94 (d,  $J = 3.5$  Hz, 1H), 6.88 – 6.85 (m, 1H), 4.78 (s, 2H);  **$^{13}C$  NMR (125 MHz,  $CDCl_3$ )**  $\delta$  162.6, 160.7, 159.4, 157.5, 150.3, 147.1, 141.6, 138.1, 134.4 (d,  $J = 40.5$  Hz), 133.1 (d,  $J = 14.5$  Hz), 131.9 (d,  $J = 34.5$  Hz), 117.0 (d,  $J = 98.5$  Hz), 114.6 (d,  $J = 84.0$  Hz), 113.5, 30.0;  **$^{19}F$  NMR (564 MHz,  $CDCl_3$ )**  $\delta$  – 112.5 (q,  $J = 7.3$  Hz, 1F); **IR ( $cm^{-1}$ )**:  $\nu$  3455, 2924, 1667, 1532, 1492, 1312, 1271, 1166, 878, 709; **HRMS**:  $m/z$ :  $[M + H]^+$  calculated for  $C_{14}H_9ClFN_3NaOS_2^+$ , 375.9752, found 375.9749.

---

## 5 X-ray structure

The single crystal was obtained by slow evaporation of a saturated solution in ethyl acetate in a loosely capped vial. Structure information was deposited at the Cambridge Crystallographic Data Center (CCDC).

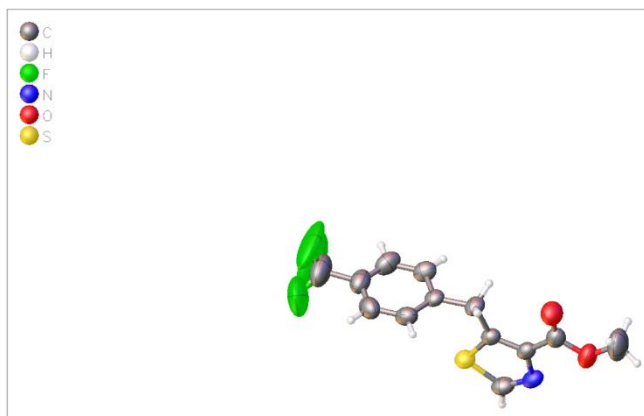

Fig. X-ray crystallographic structure of **3h** (CCDC 2042211).

---

## 6 References

- 1 D. Kurandina, V. Gevorgyan, Rhodium Thiavinyl Carbenes from 1,2,3-Thiadiazoles Enable Modular Synthesis of Multisubstituted Thiophenes, *Org. Lett.*, 2016, **18**, 1804.
- 2 C. Wang, X. Geng, P. Zhao, Y. Zhou, Y.-D. Wu, Y.-F. Cui, A.-X. Wu, I<sub>2</sub>/CuCl<sub>2</sub>-Promoted One-Pot Three-Component Synthesis of Aliphatic or Aromatic Substituted 1,2,3-Thiadiazoles, *Chem. Commun.*, 2019, **55**, 8134.
- 3 L. M. Pevzner, Yu. O. Remizov, M. L. Petrov, Synthesis of 2- and 3-acetylfuran carbethoxyhydrazones and investigation of their reaction with thionyl chloride, *Russ. J. Gen. Chem.*, 2015, **85**, 61.
- 4 A. Odriozola, M. Oiarbide, C. Palomo, Enantioselective Synthesis of Quaternary  $\Delta^4$ - and  $\Delta^5$ -Dehydroprolines Based on a Two-Step Formal [3+2] Cycloaddition of  $\alpha$ -Aryl and  $\alpha$ -Alkyl Isocyano(thio)acetates with Vinyl Ketones, *Chem. Eur. J.*, 2017, **23**, 12758.
- 5 W. Liang, K. Nakajima, Y. Nishibayashi, Rhodium-Catalyzed Cyclization Reactions of Thiadiazoles with Phosphaalkynes to Prepare 1,3-Thiaphospholes, *Eur. J. Org. Chem.*, 2020, **2020**, 3879.
- 6 S. Peña, L. Scarone, E. Manta, G. Serra, As efficient synthesis of 2,4-bi-1,3-oxa(thia)zoles as scaffolds for bioactive products, *Chem. Heterocycl. Compd.*, 2011, **47**, 703.
- 7 J. Franco, A. Medeiros, D. Benítez, K. Perelmuter, G. Serra, M. A. Comini, L. Scarone, In *vitro* activity and mode of action of distamycin analogues against African trypanosomes, *Eur. J. Med. Chem.*, 2017, **126**, 776.
- 8 P. Patil, O. Logo, M. A. Moghaddama, A. Dömling, Isocyanide 2.0, *Green Chem.*, **20**, 6902.

# 7 Copies of NMR spectra

11

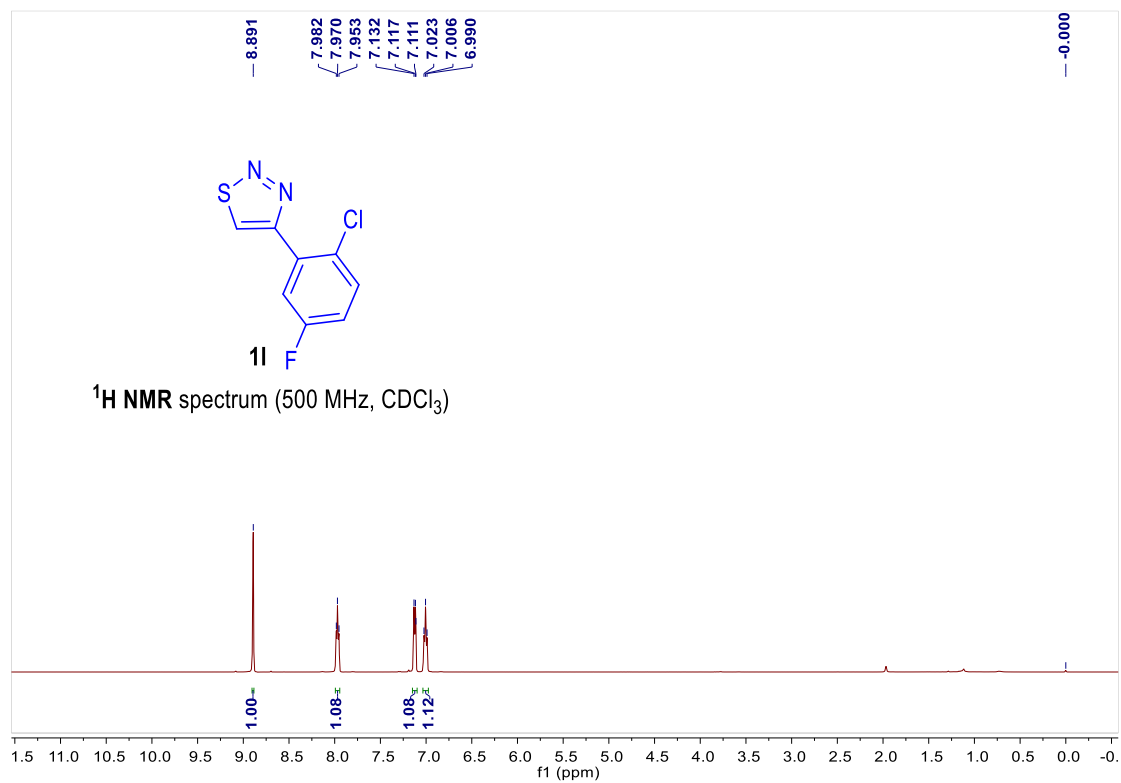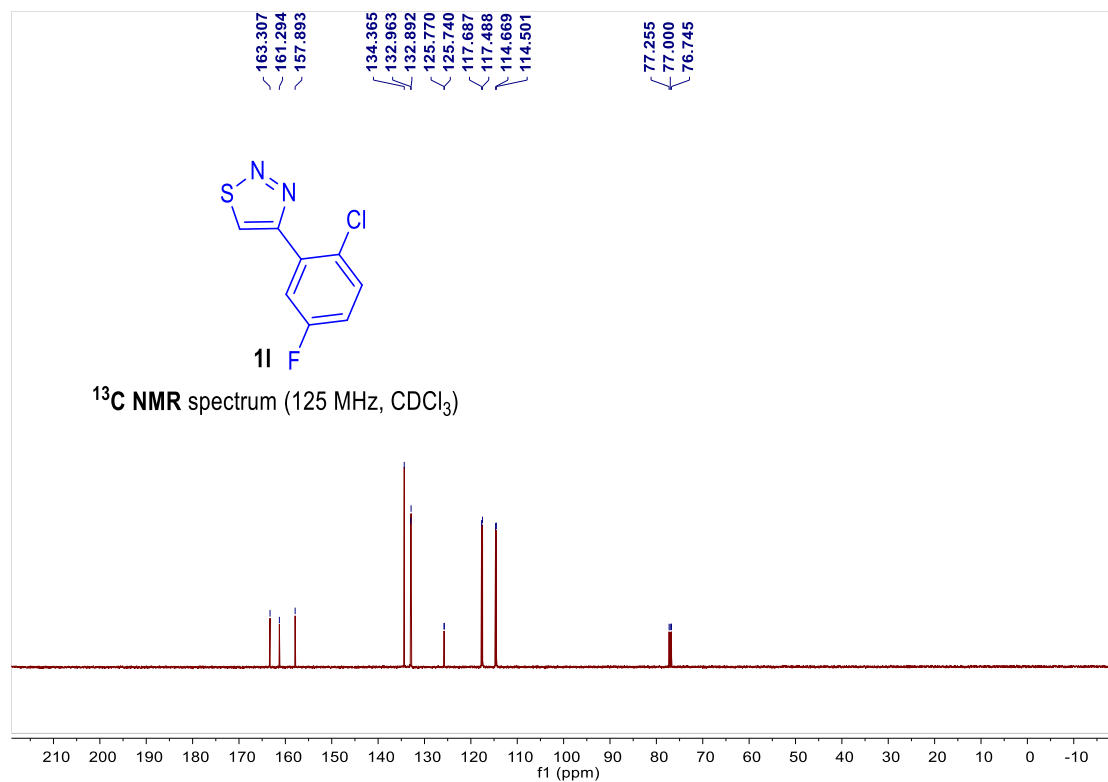

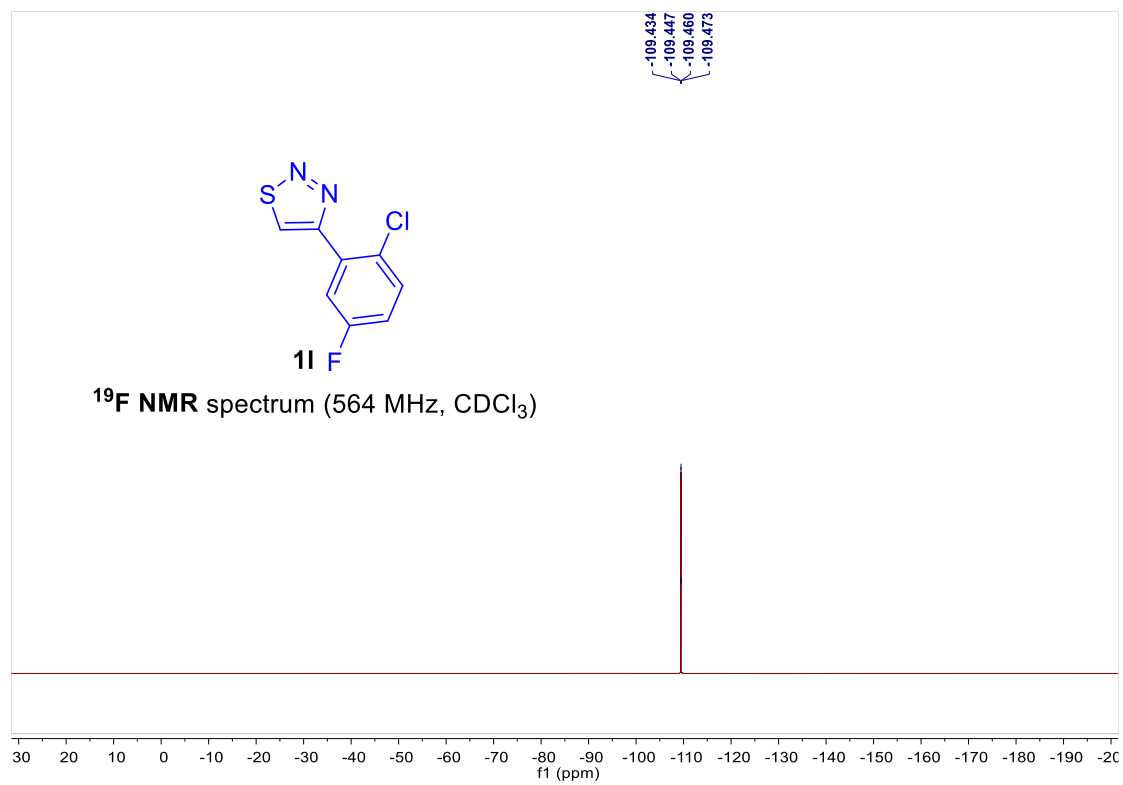

1p

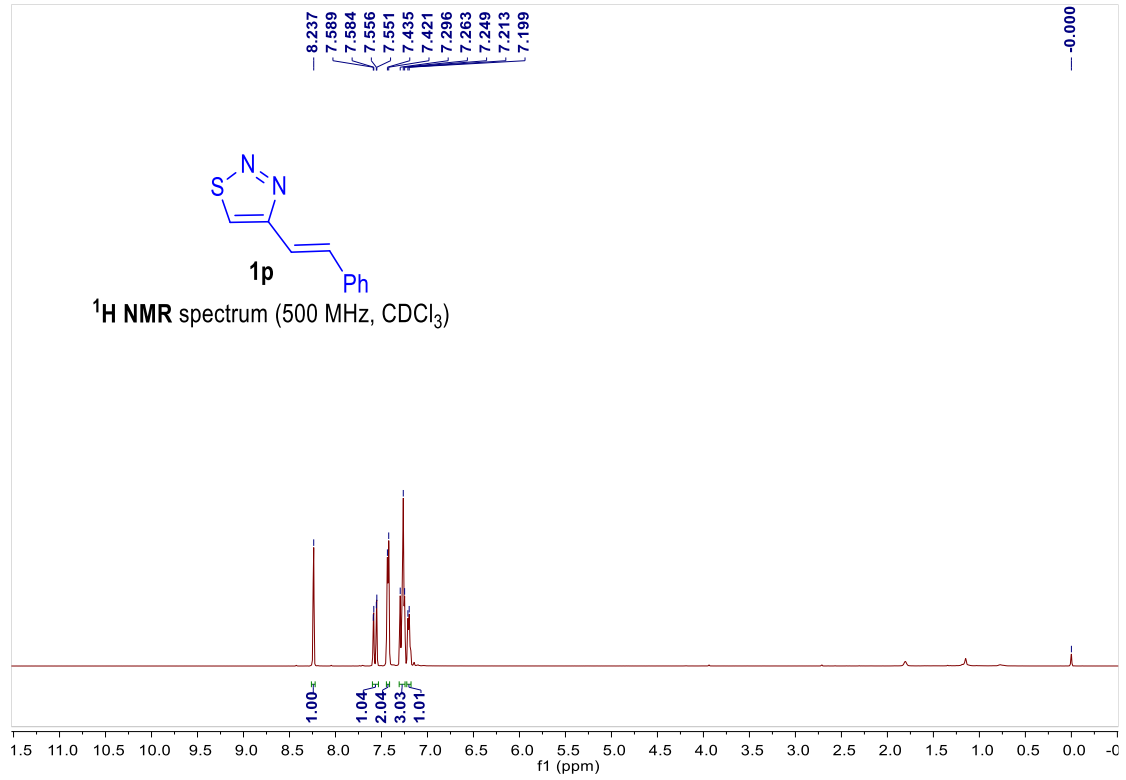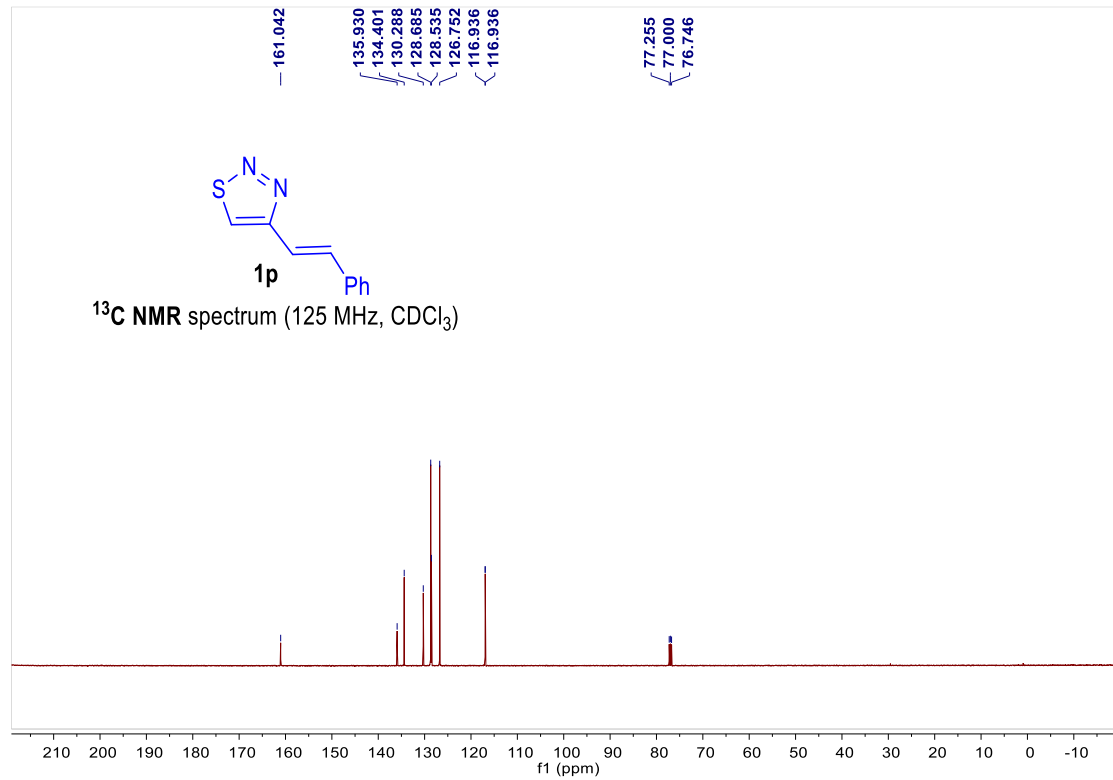



1q

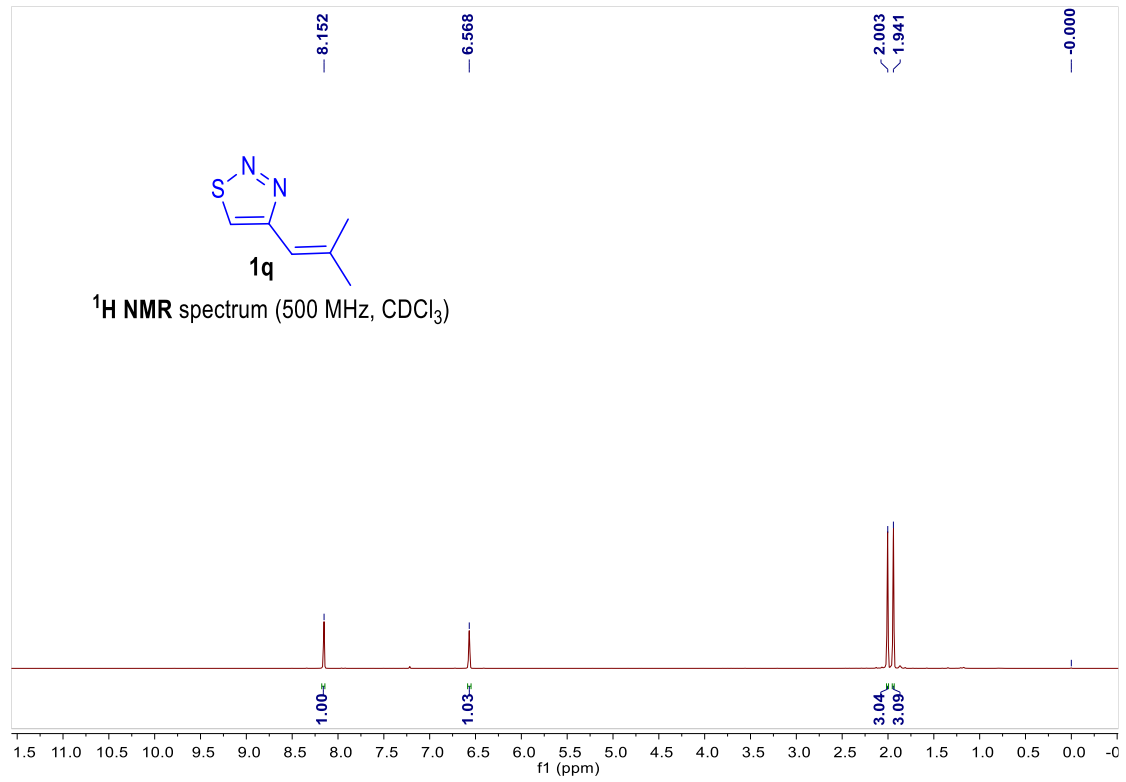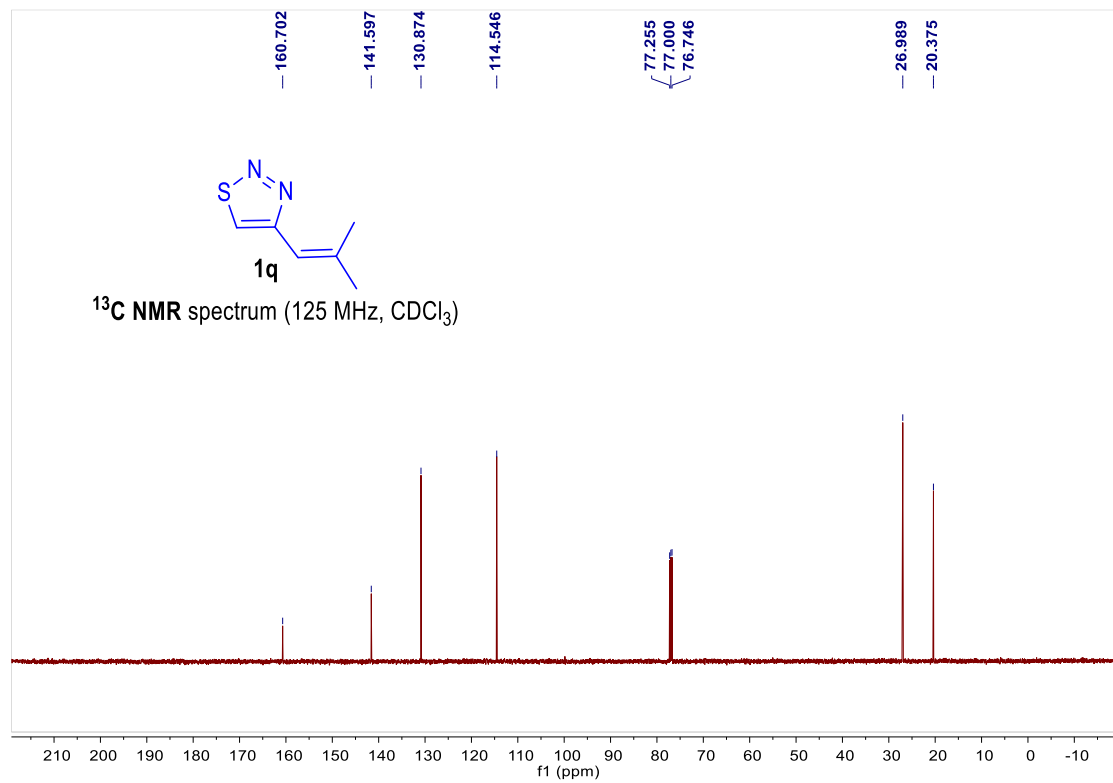

1r

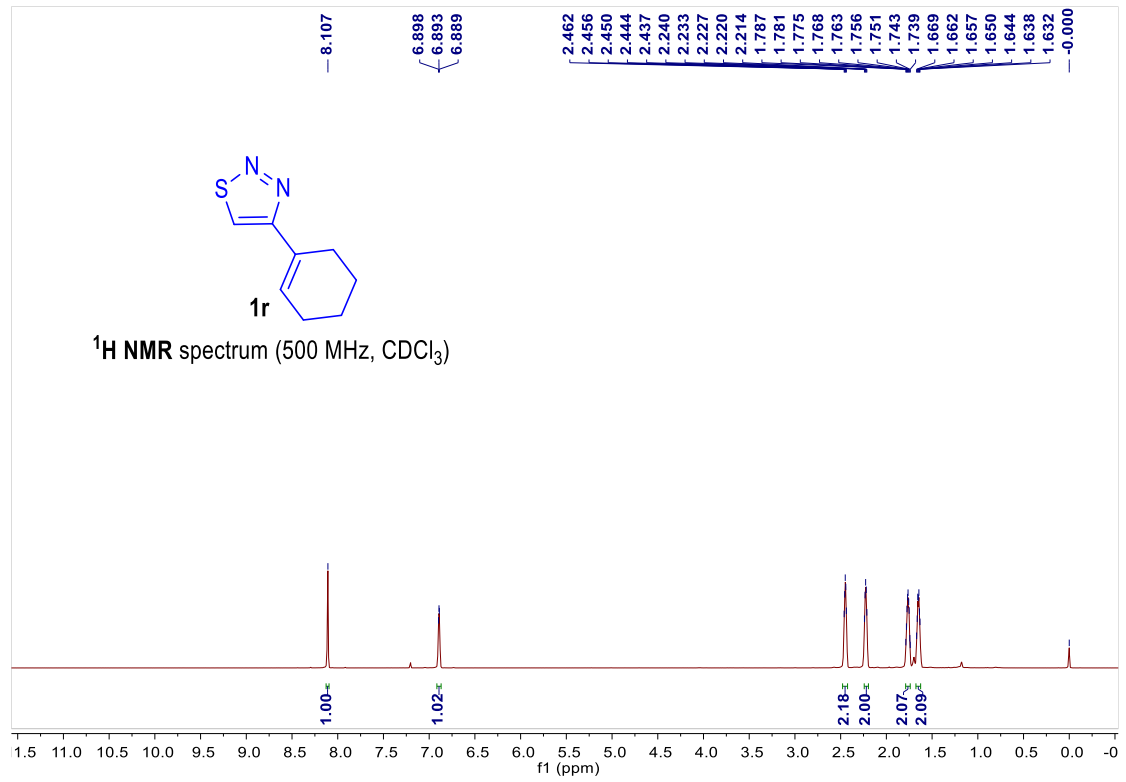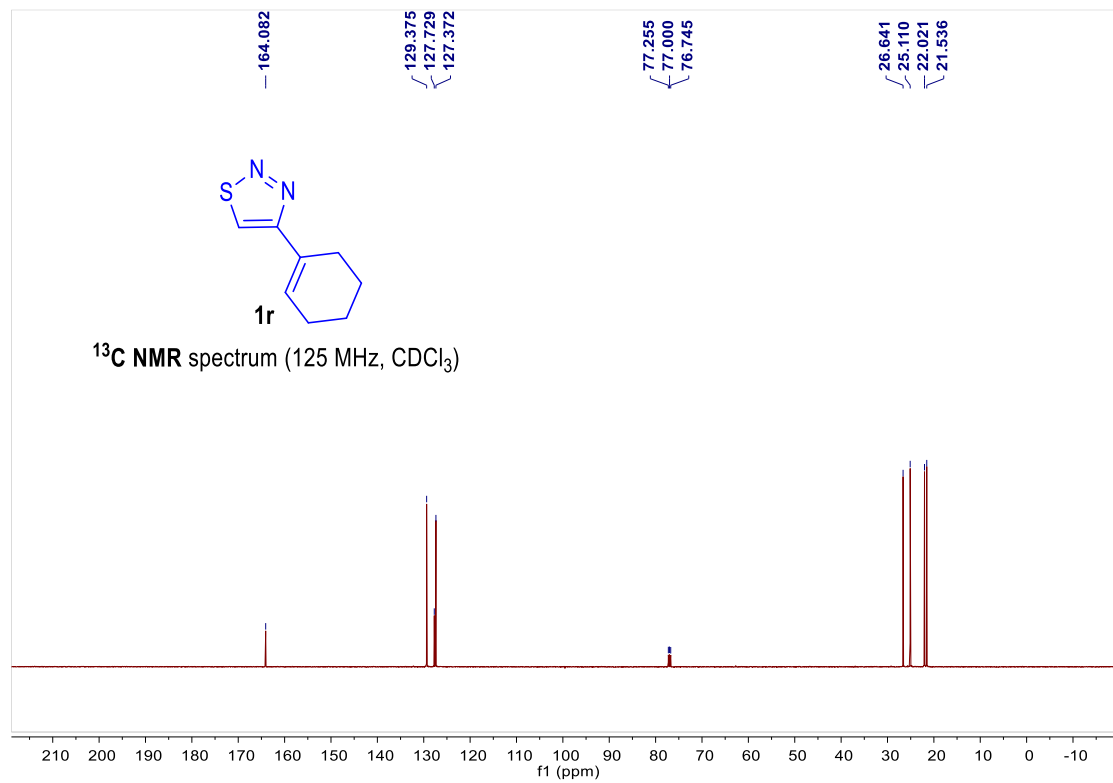

2c

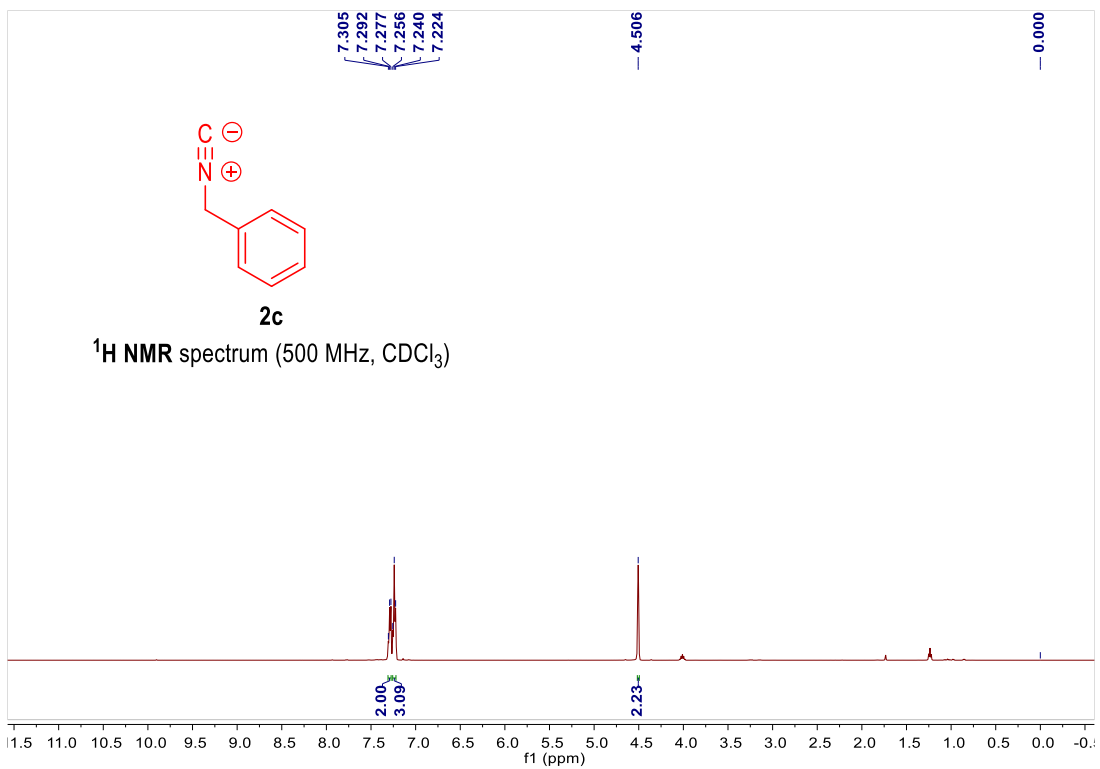

2d

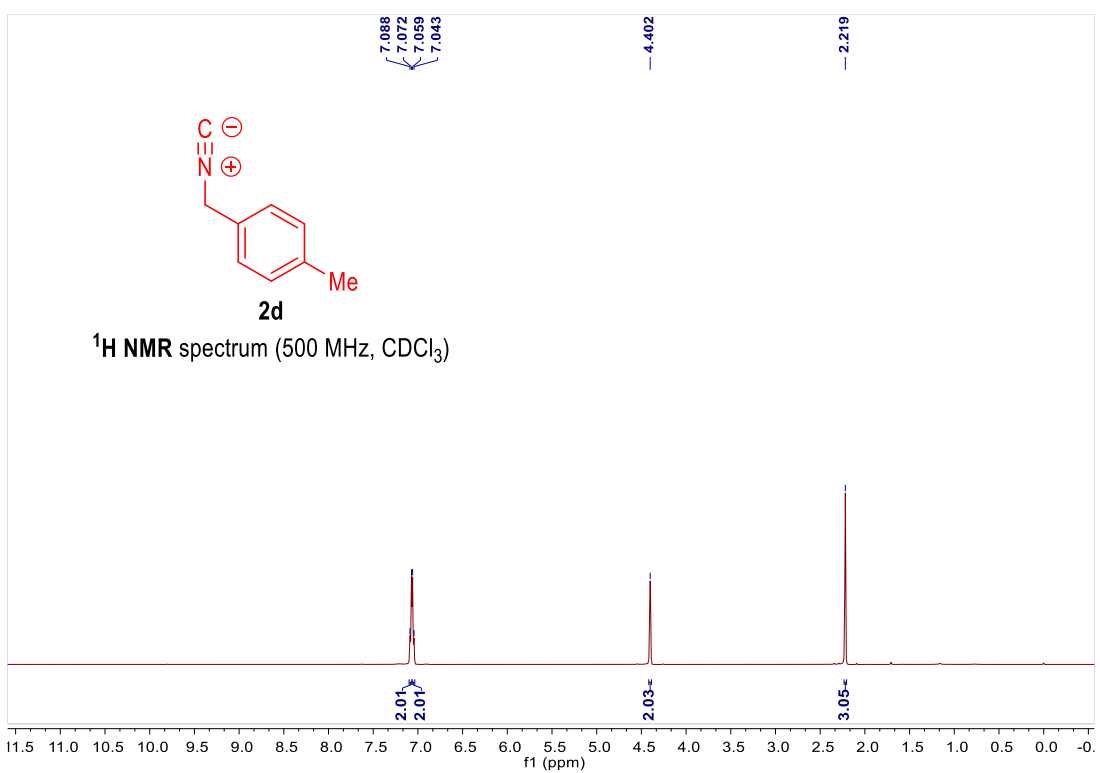

3a

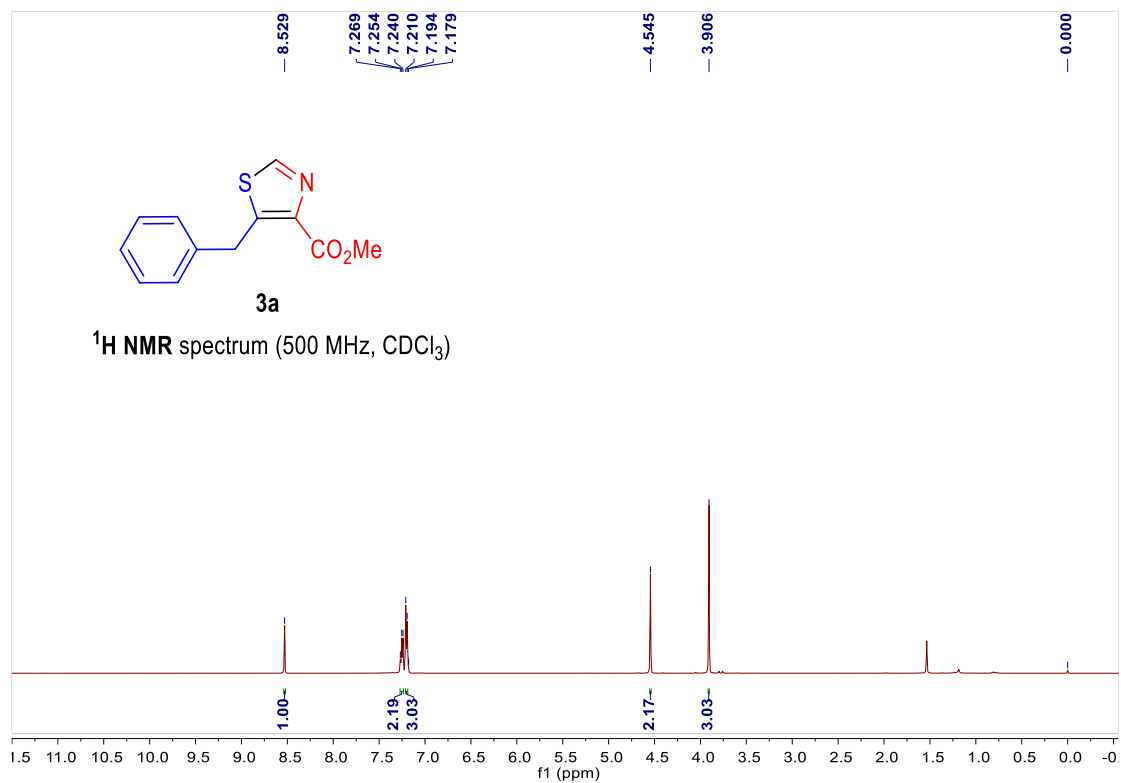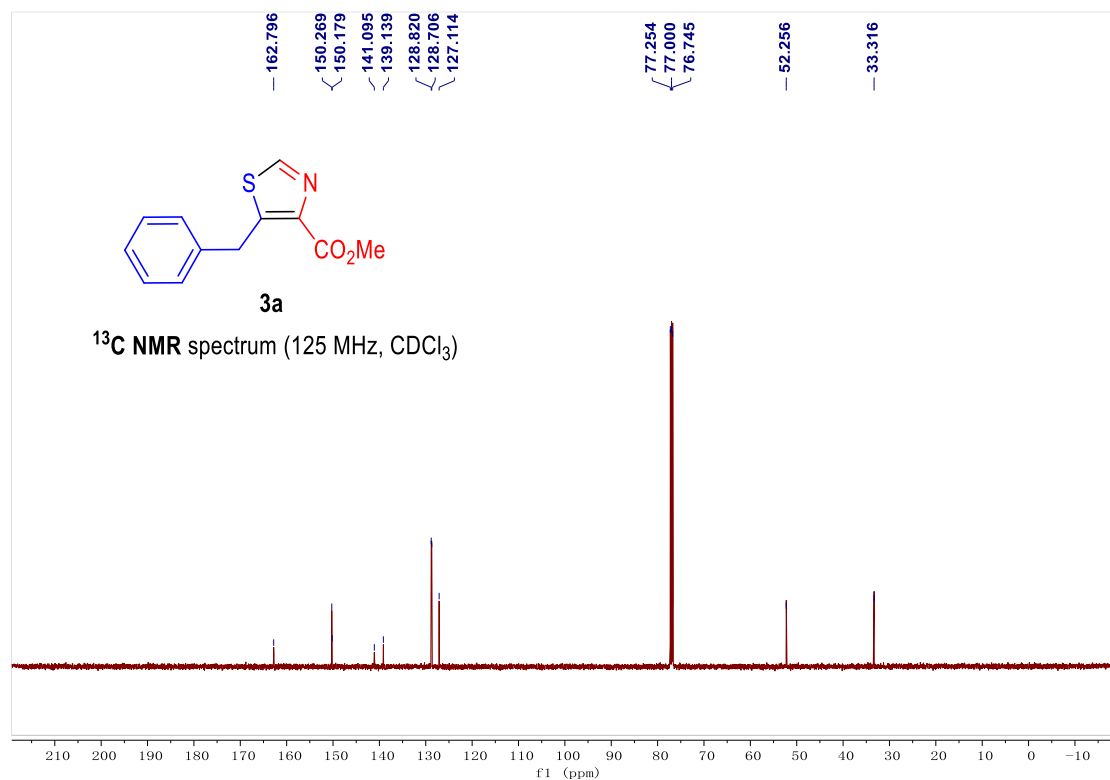

3b

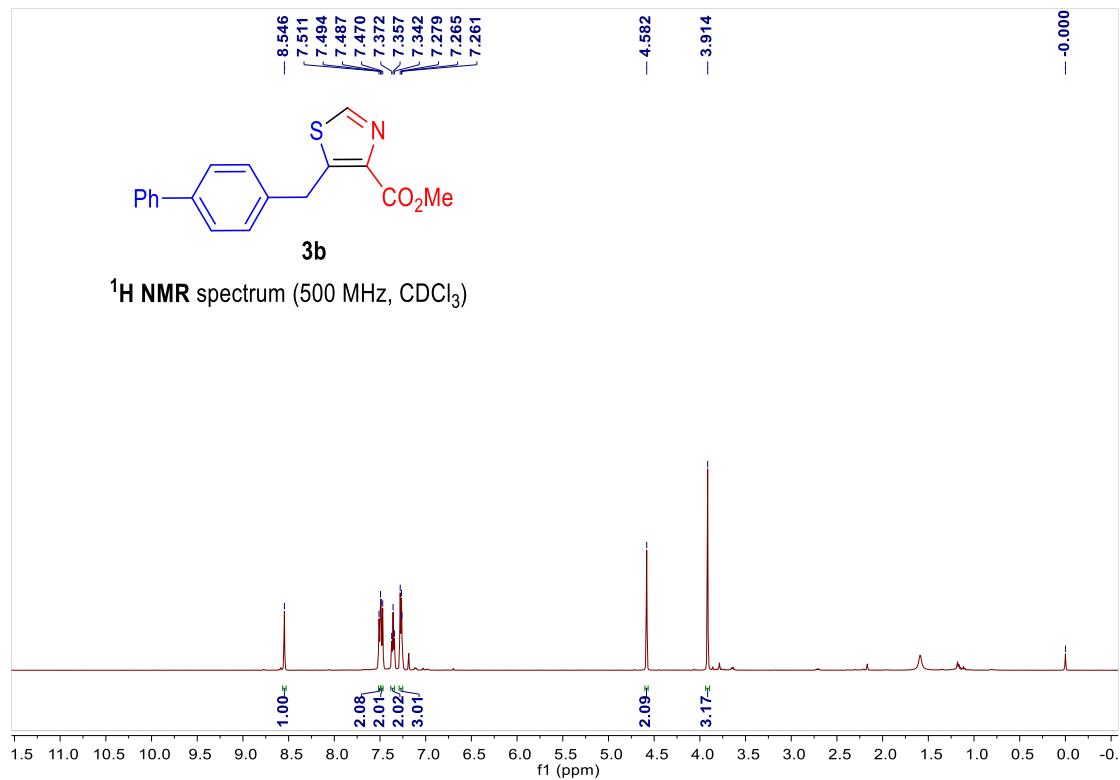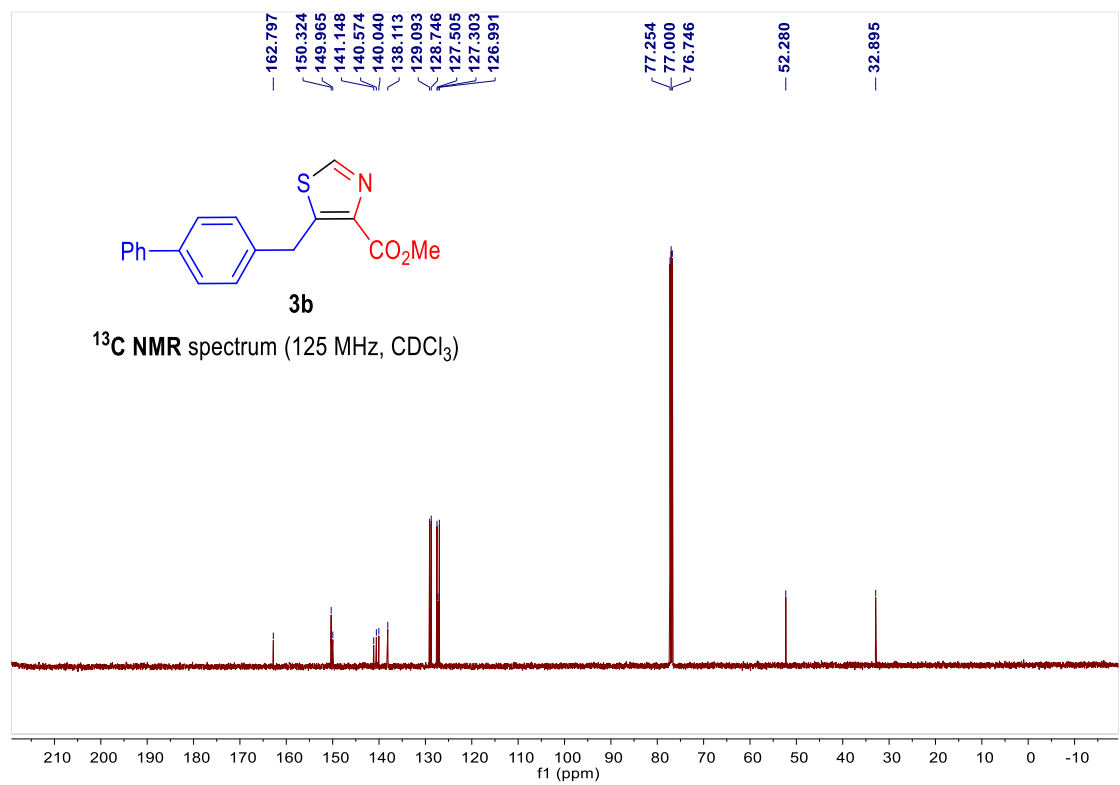

3c

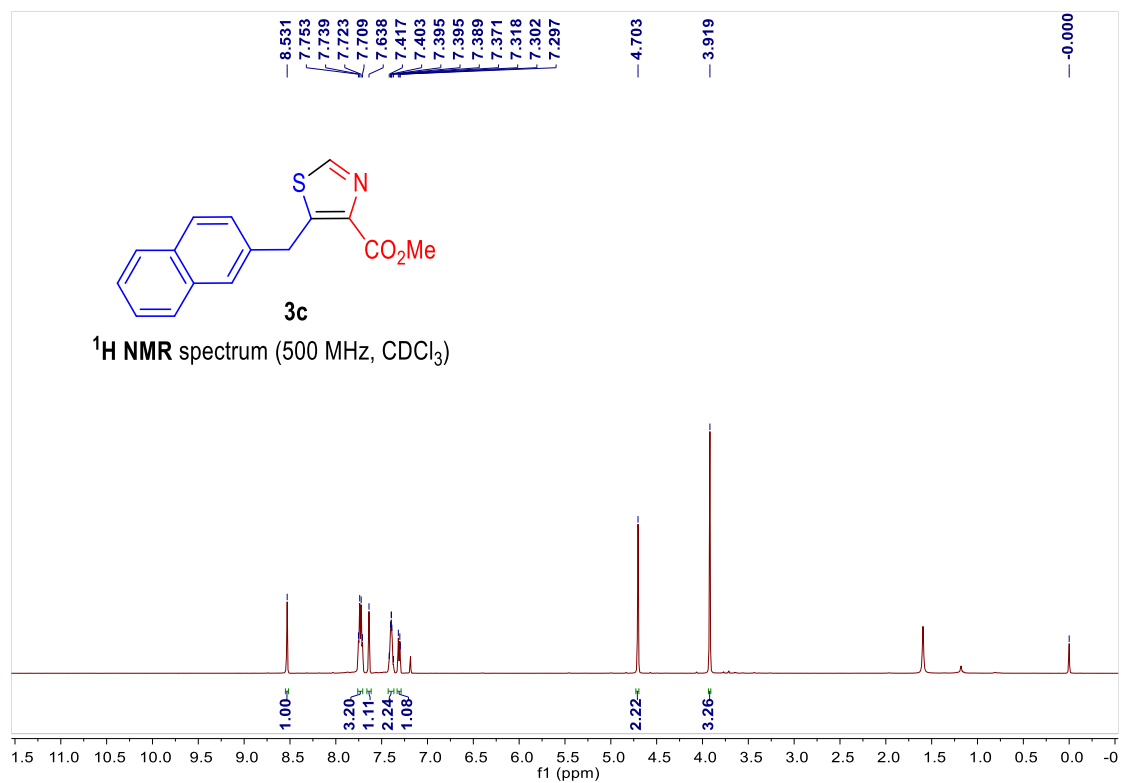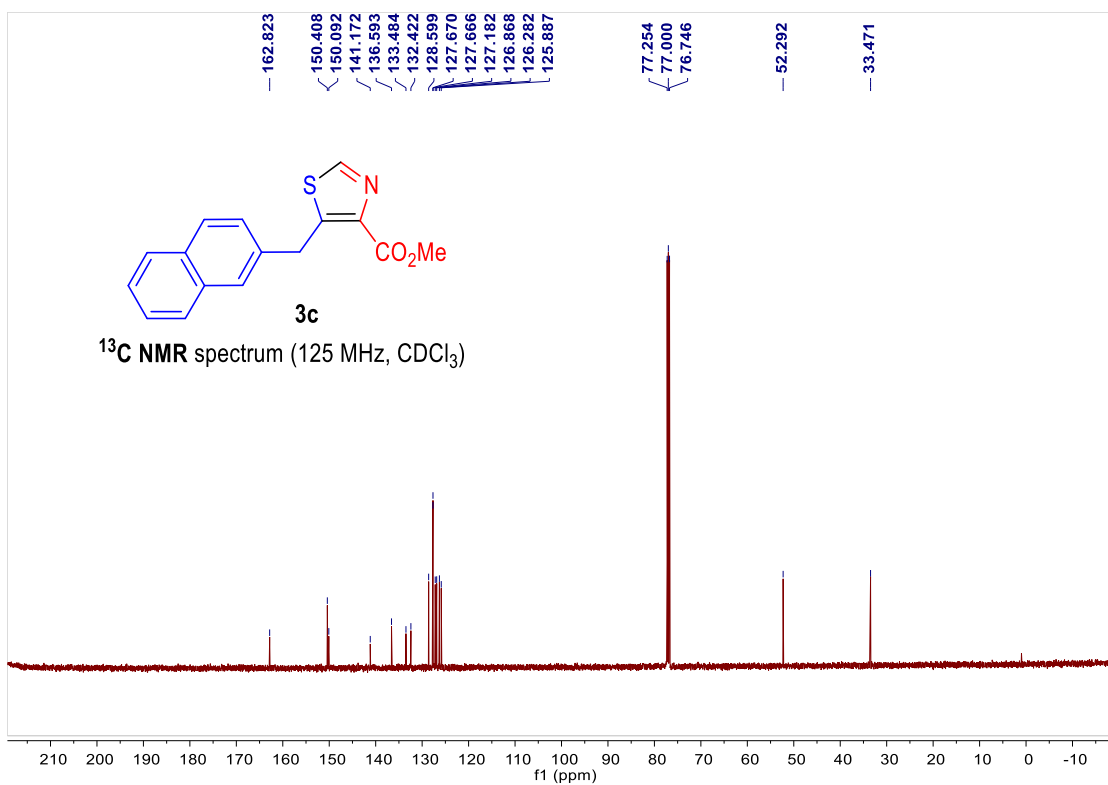

3d

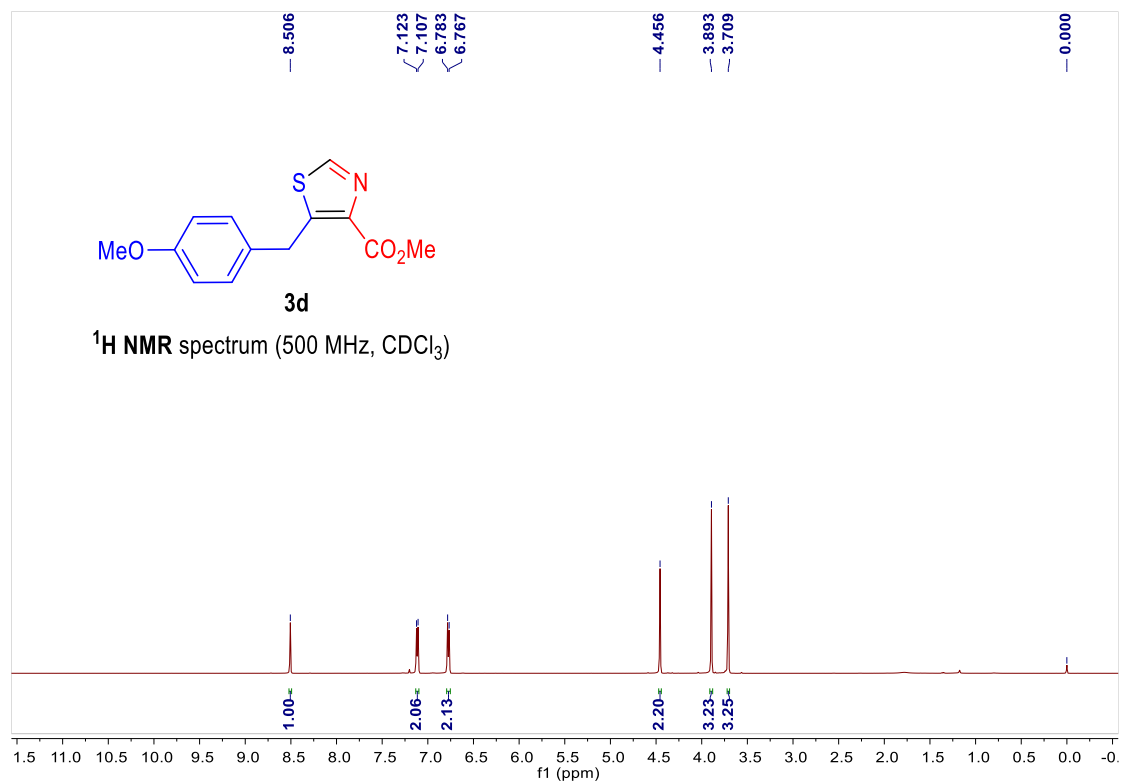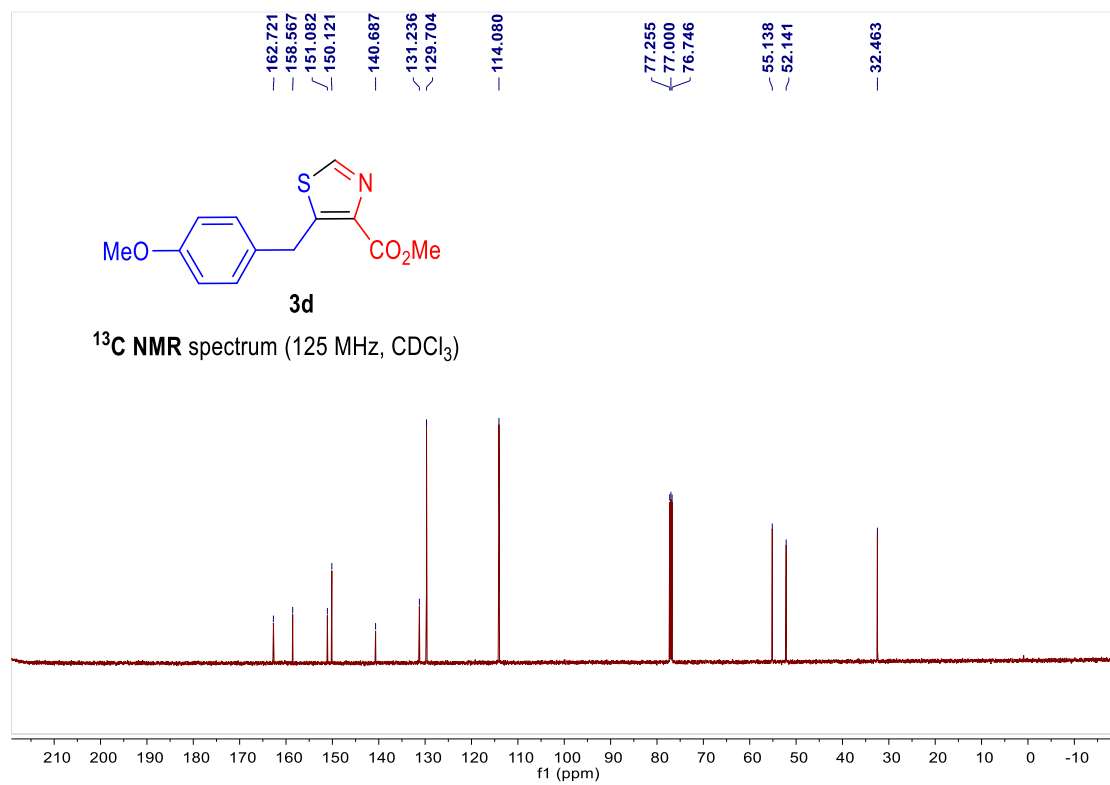

3e

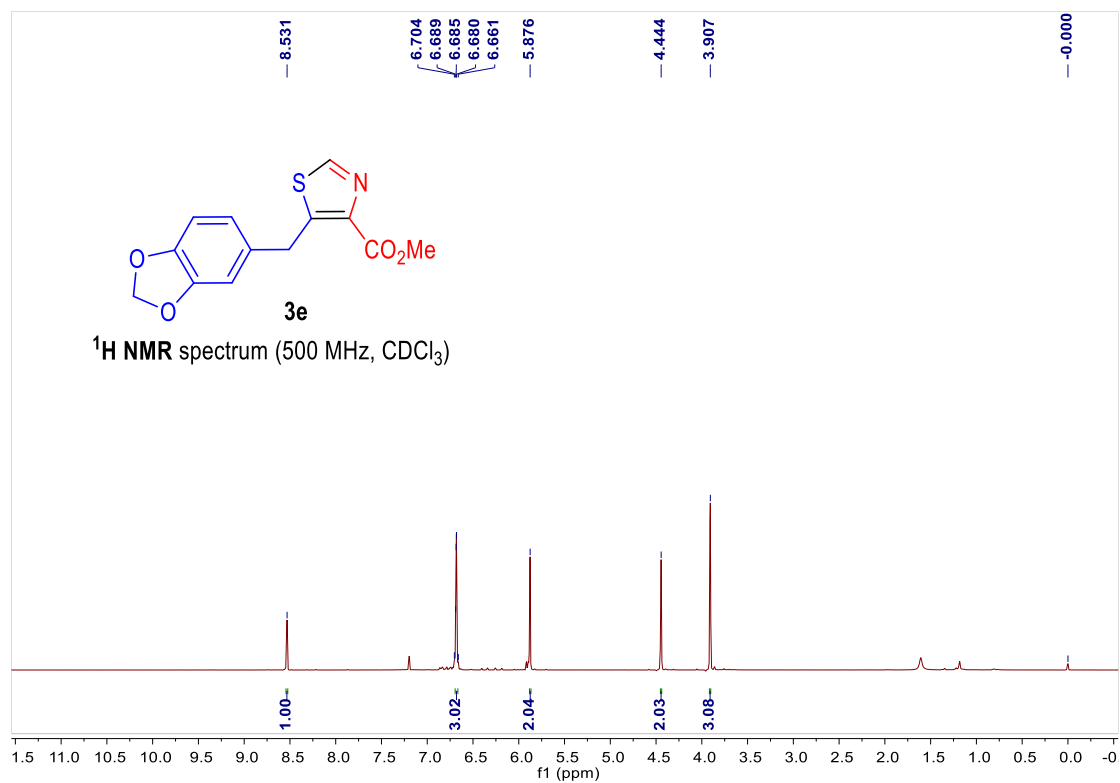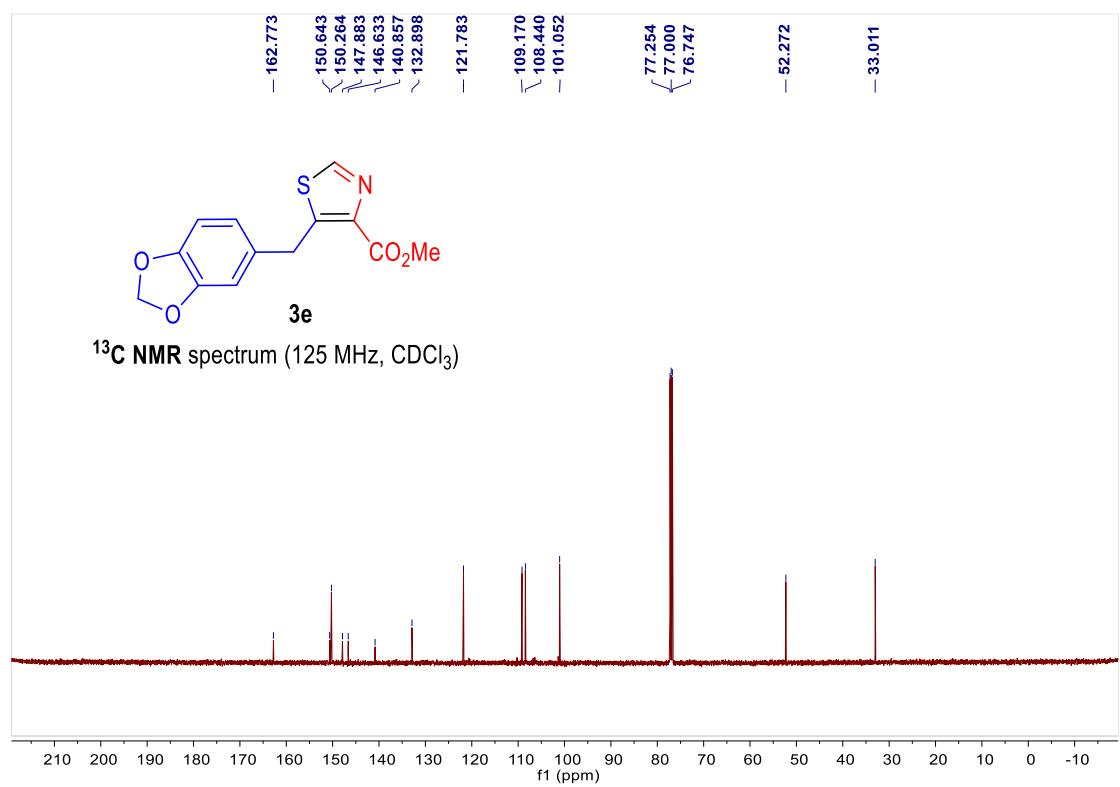



3f

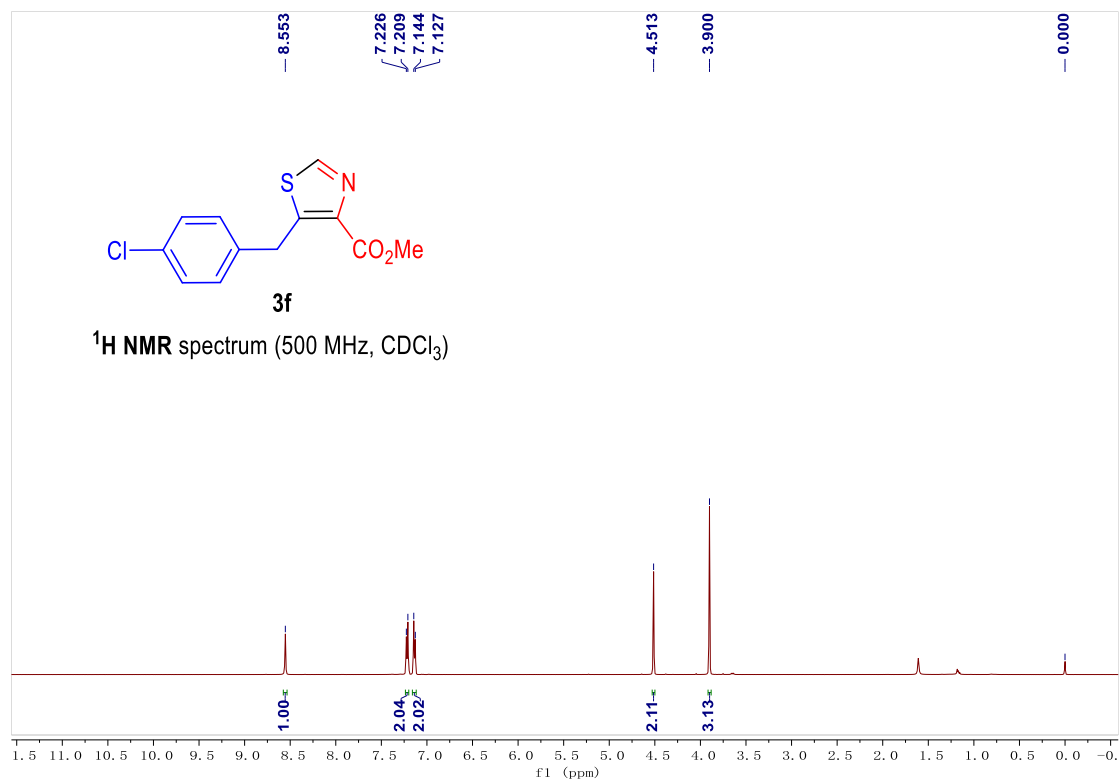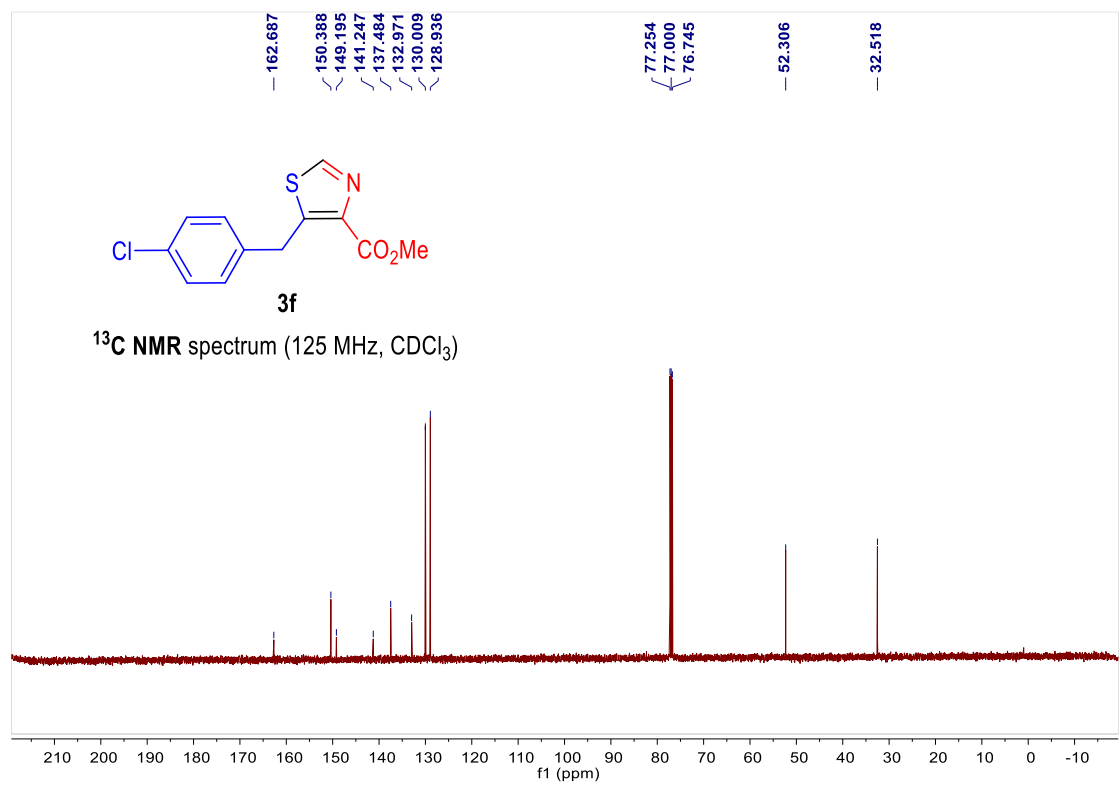

3g

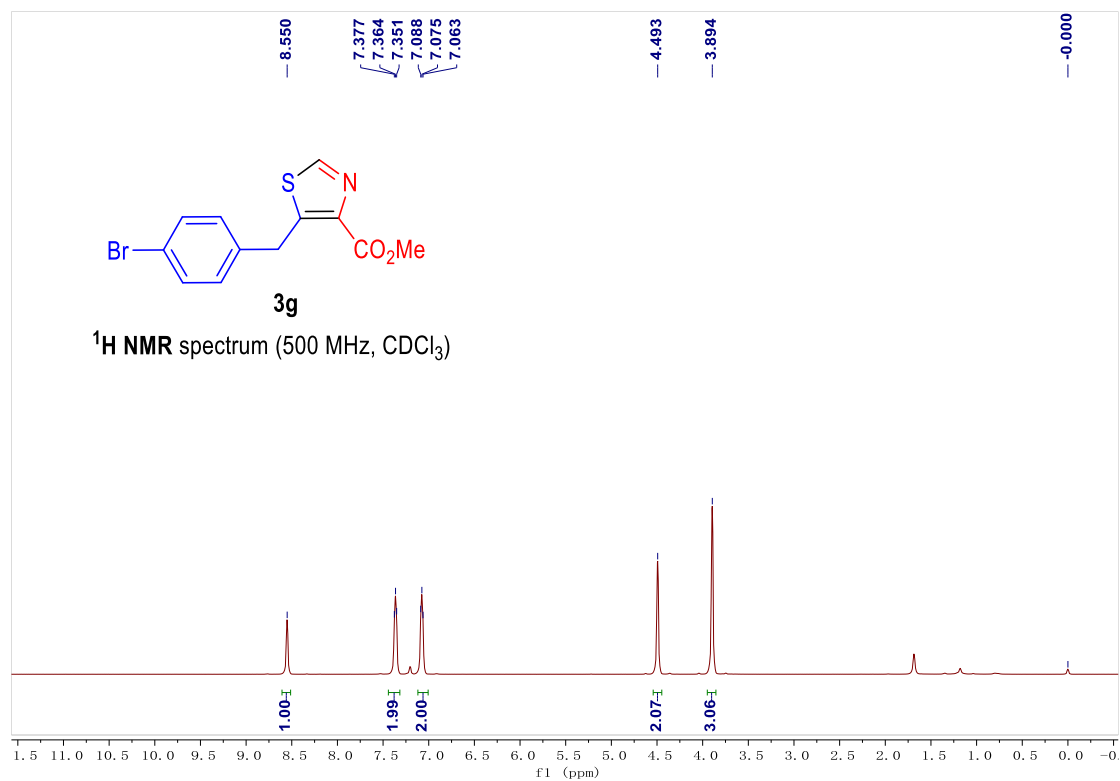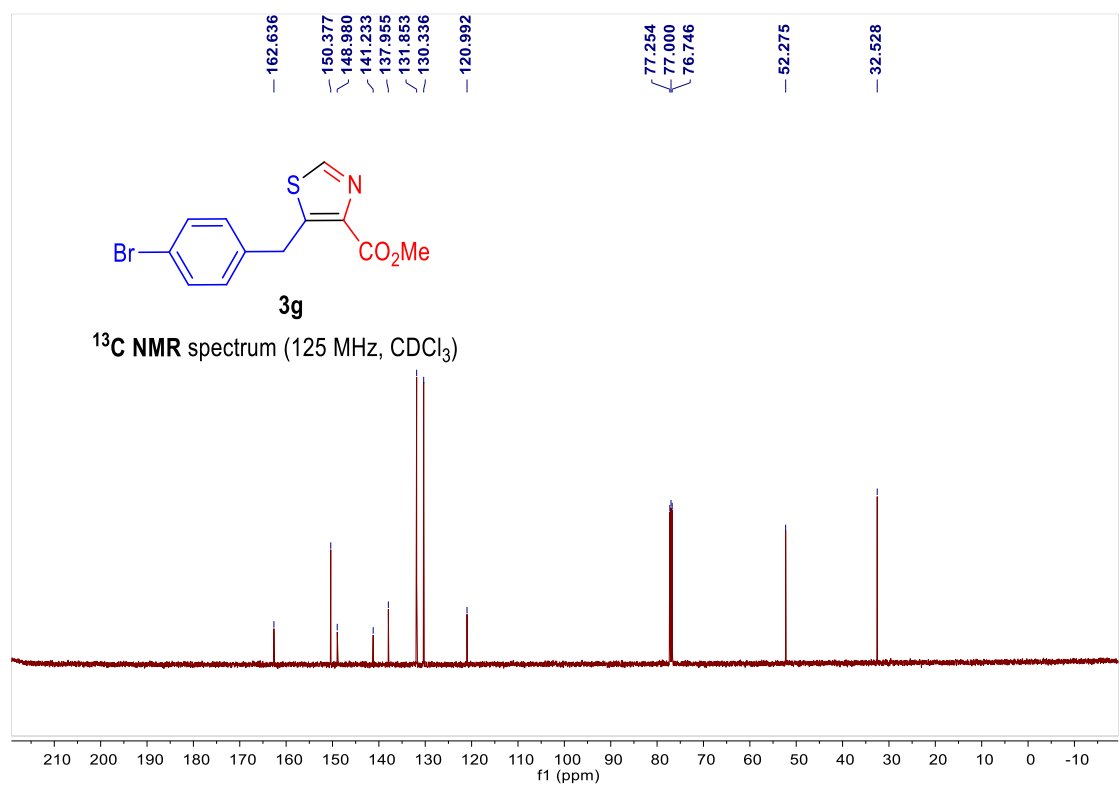

3h

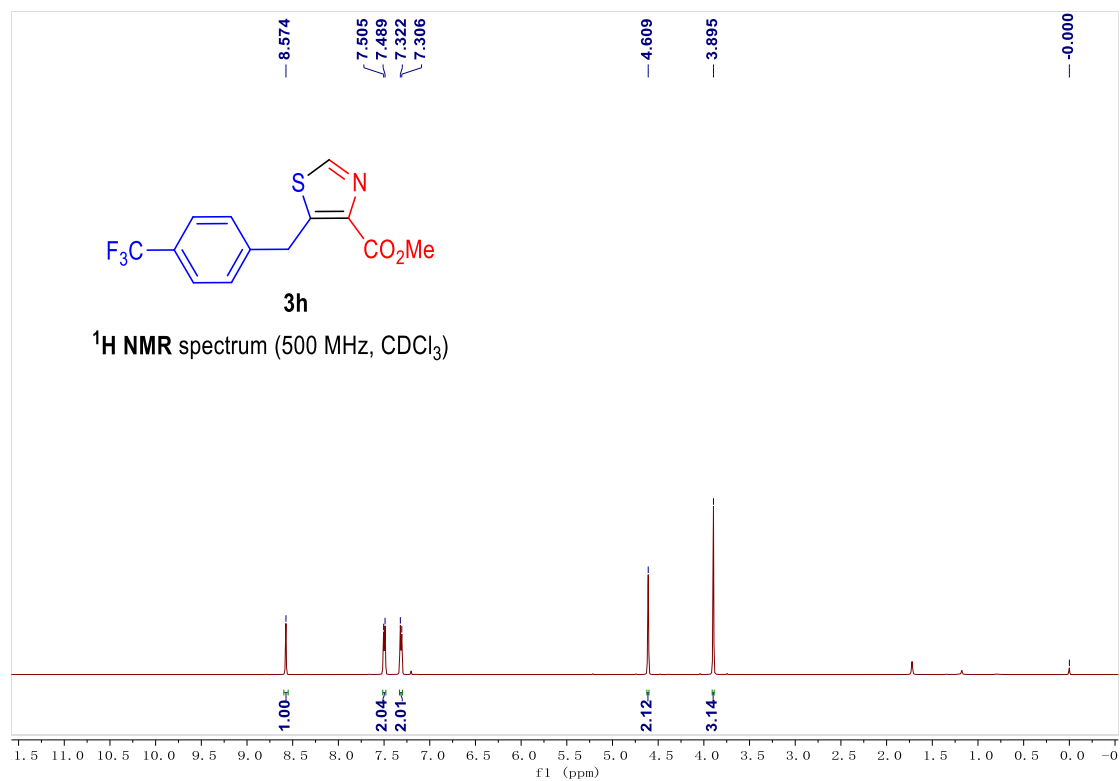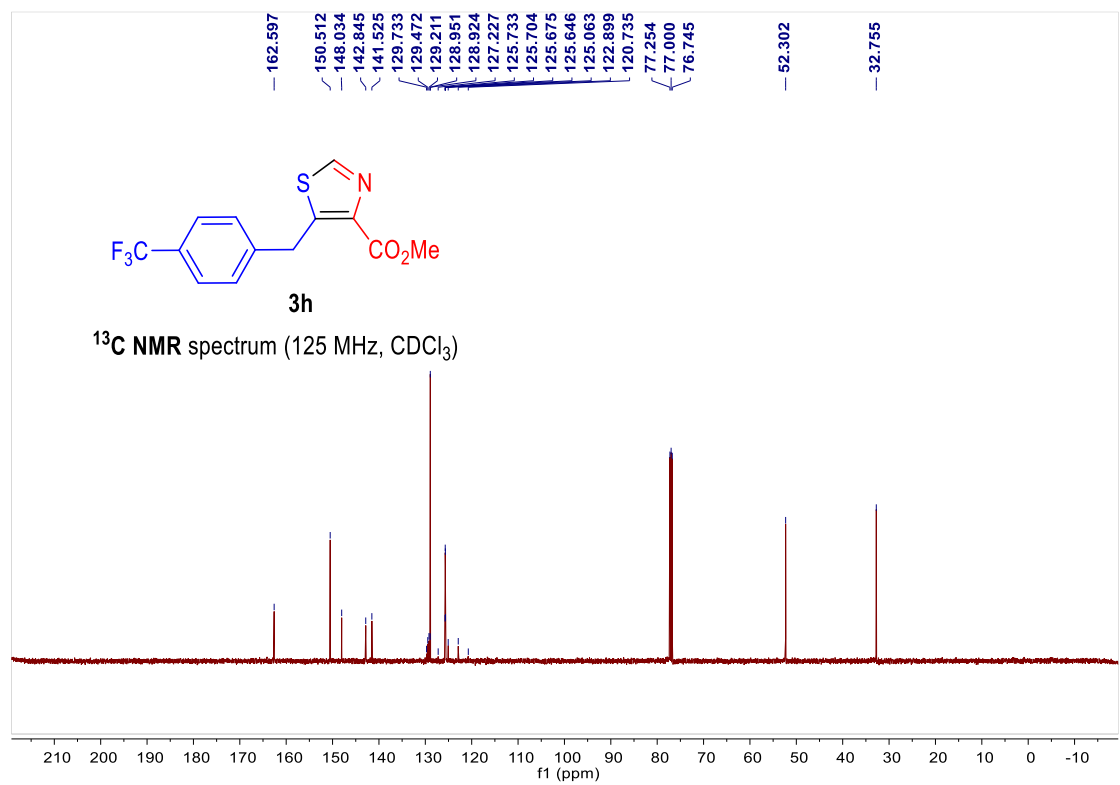

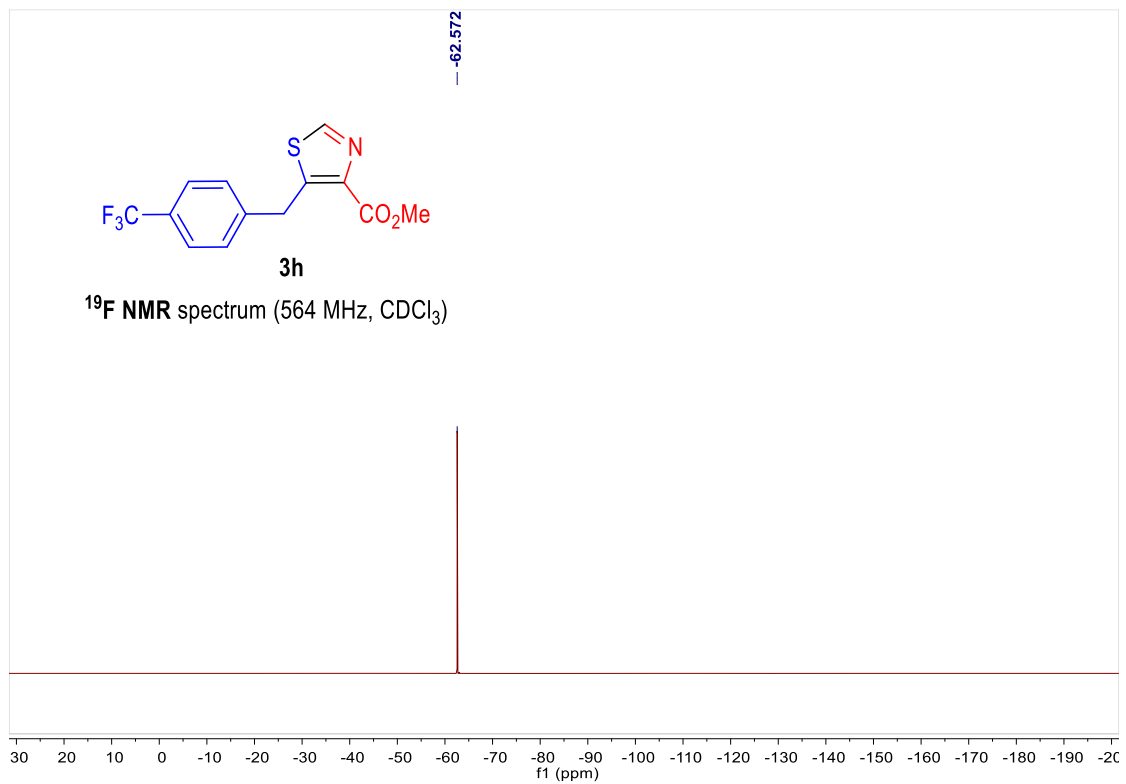

3i

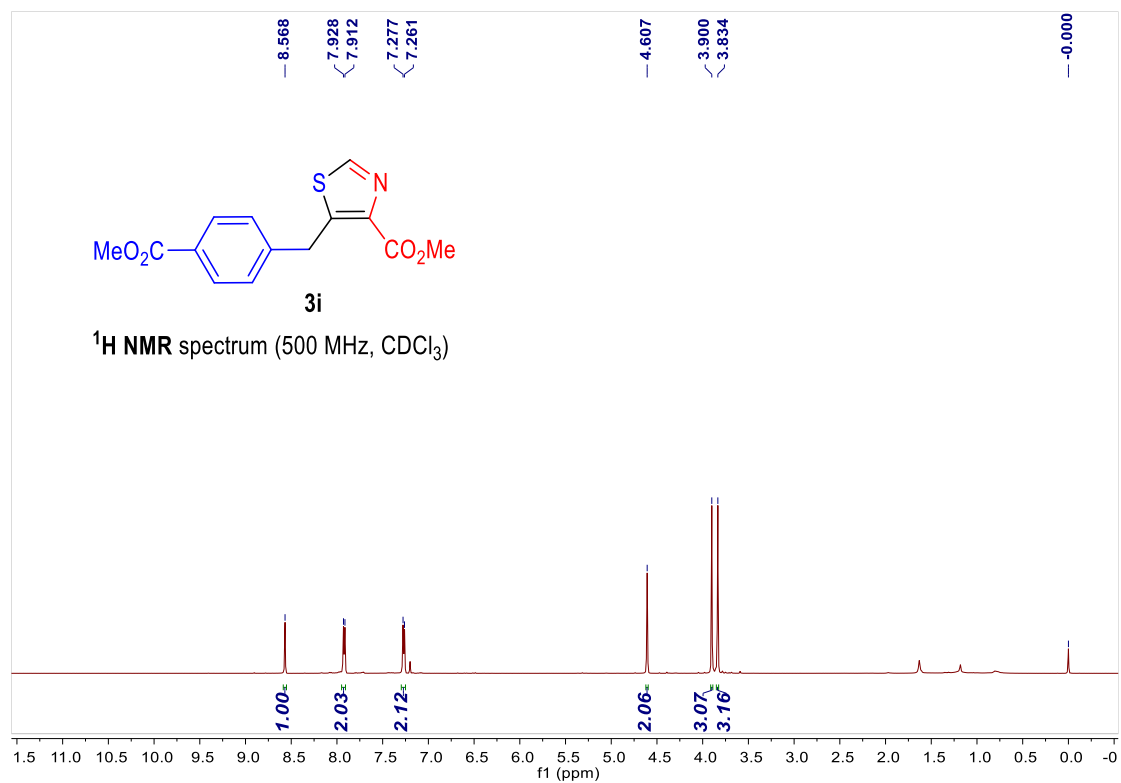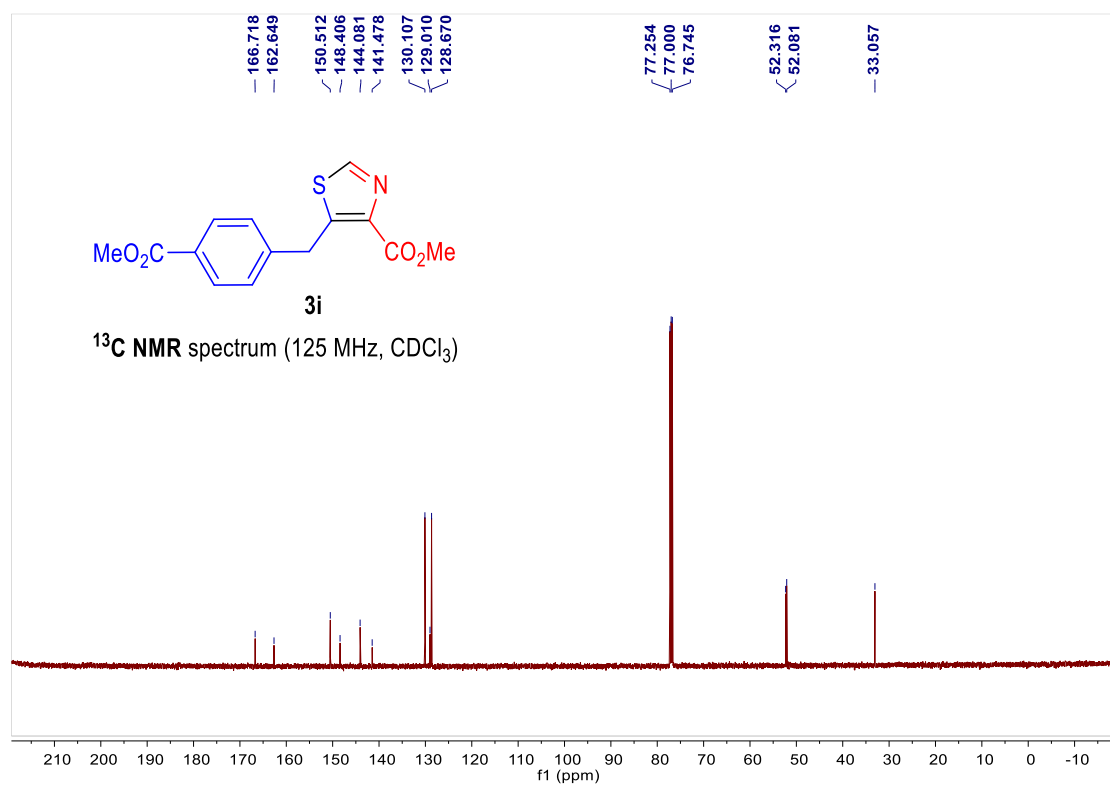

3j

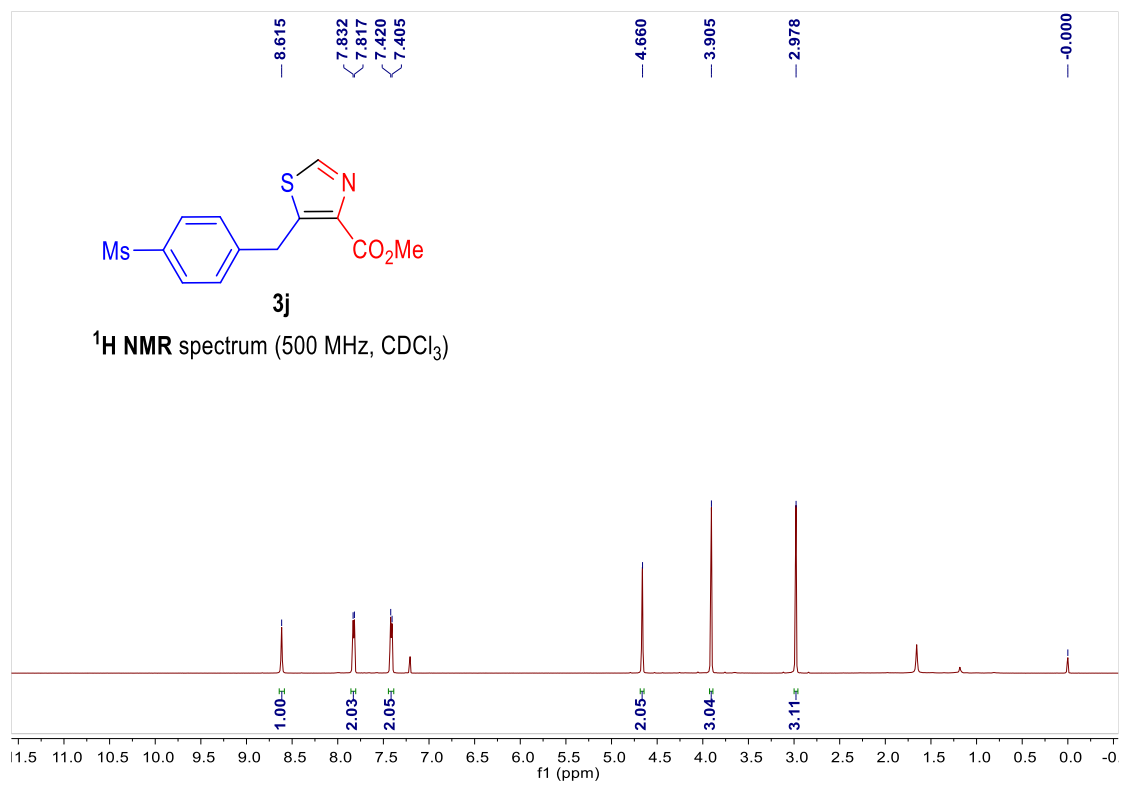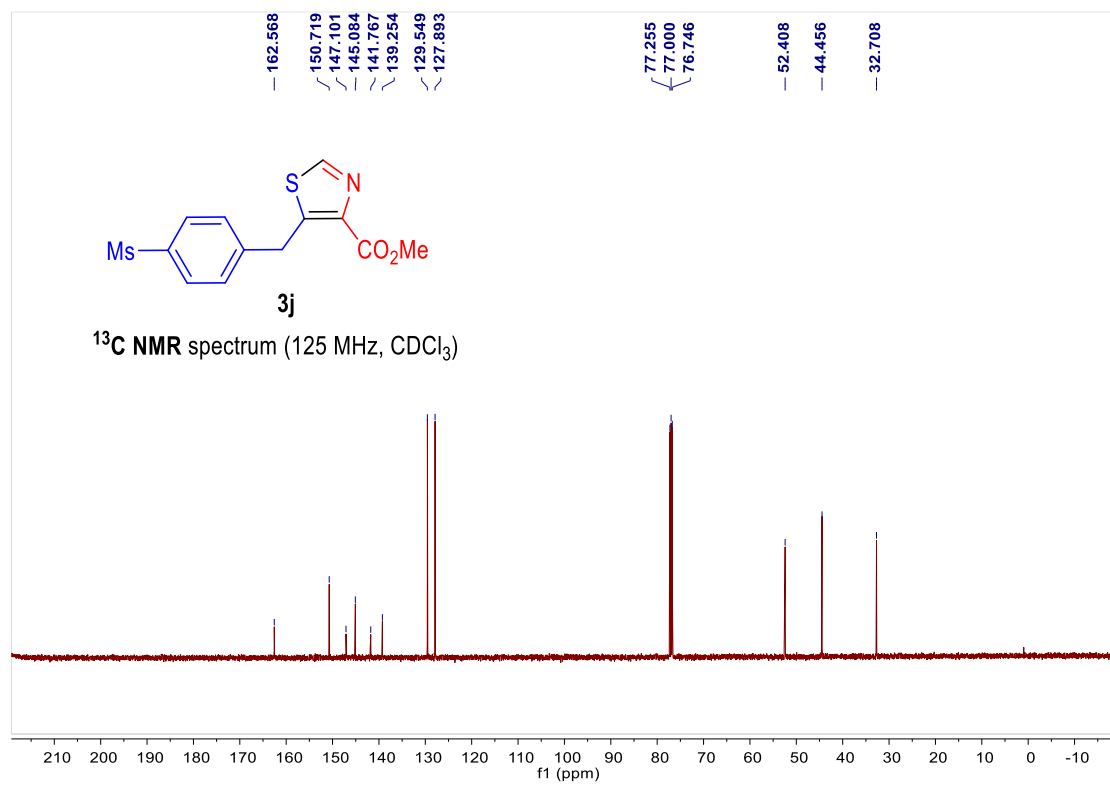

3k

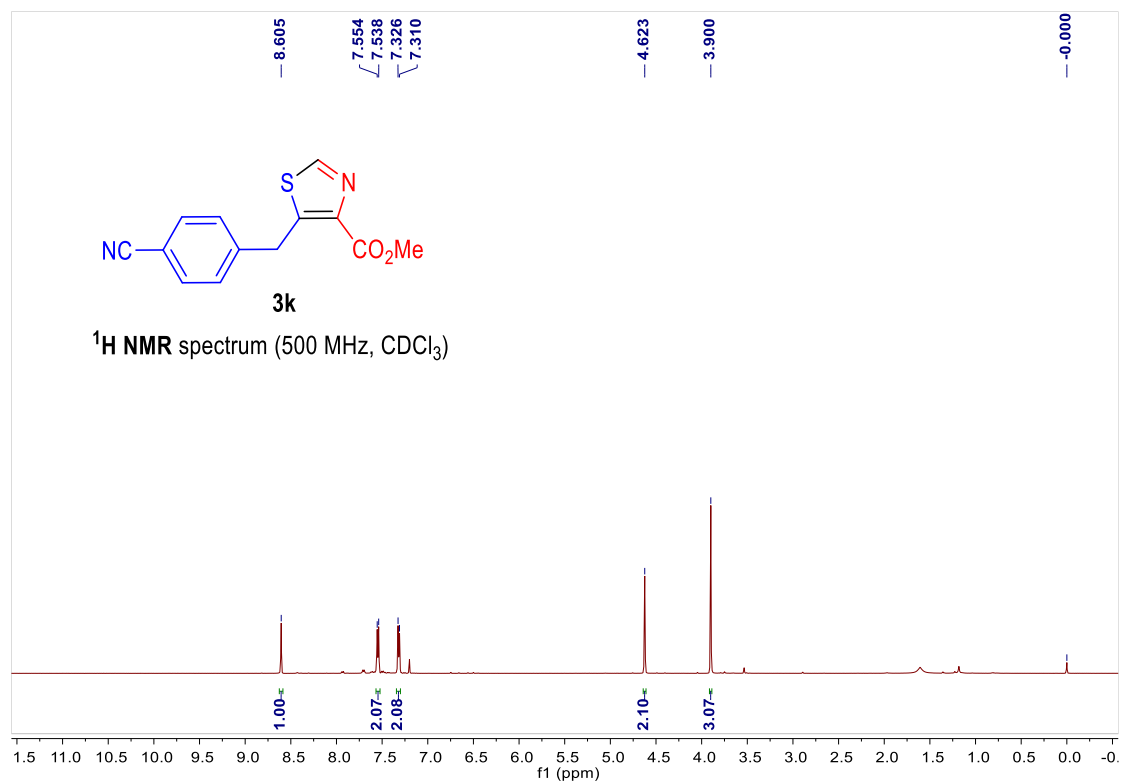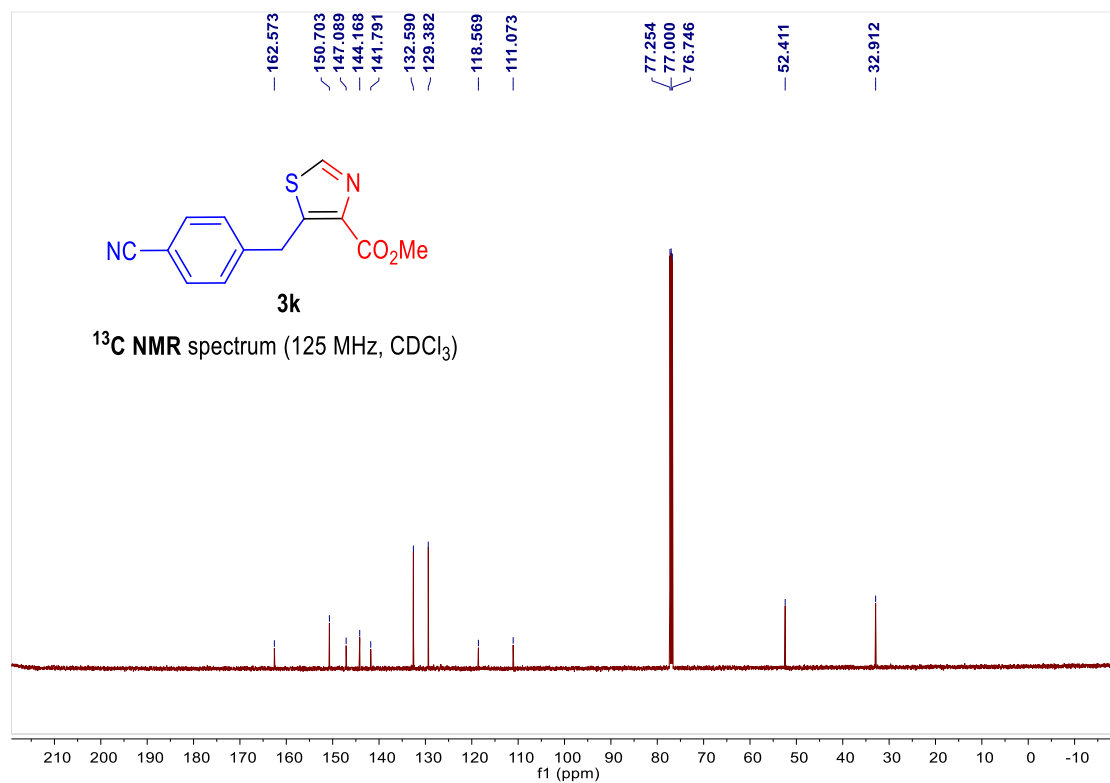

3I

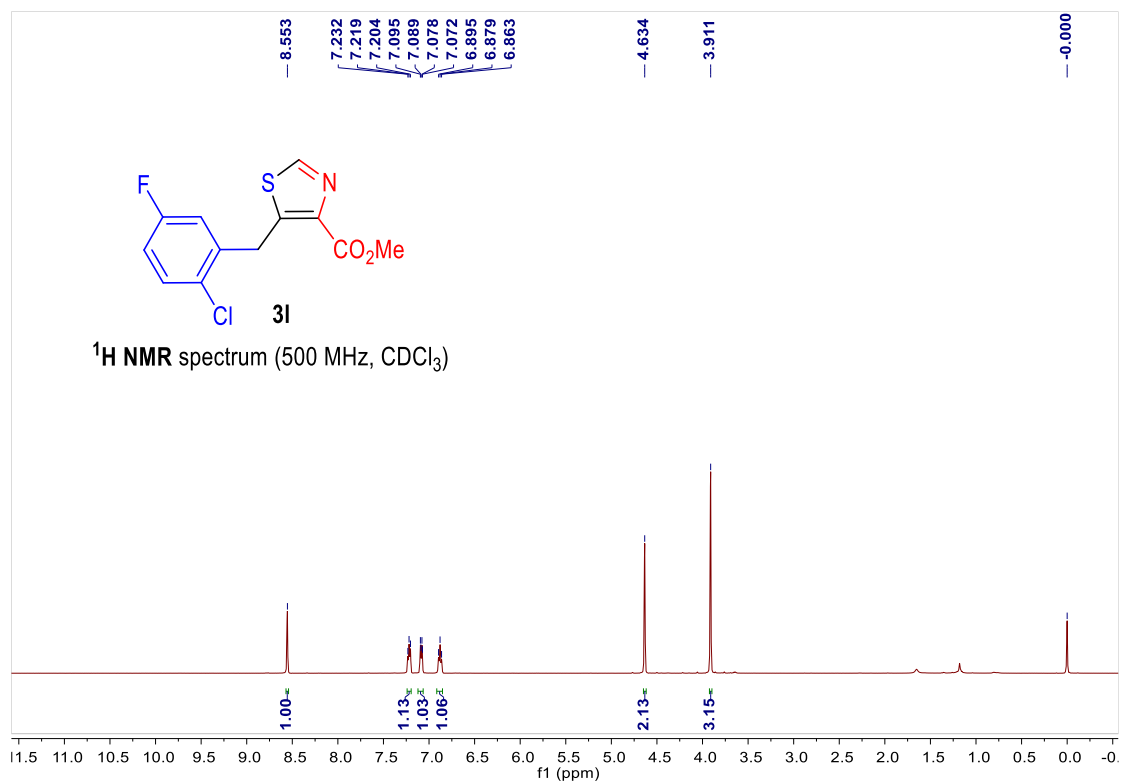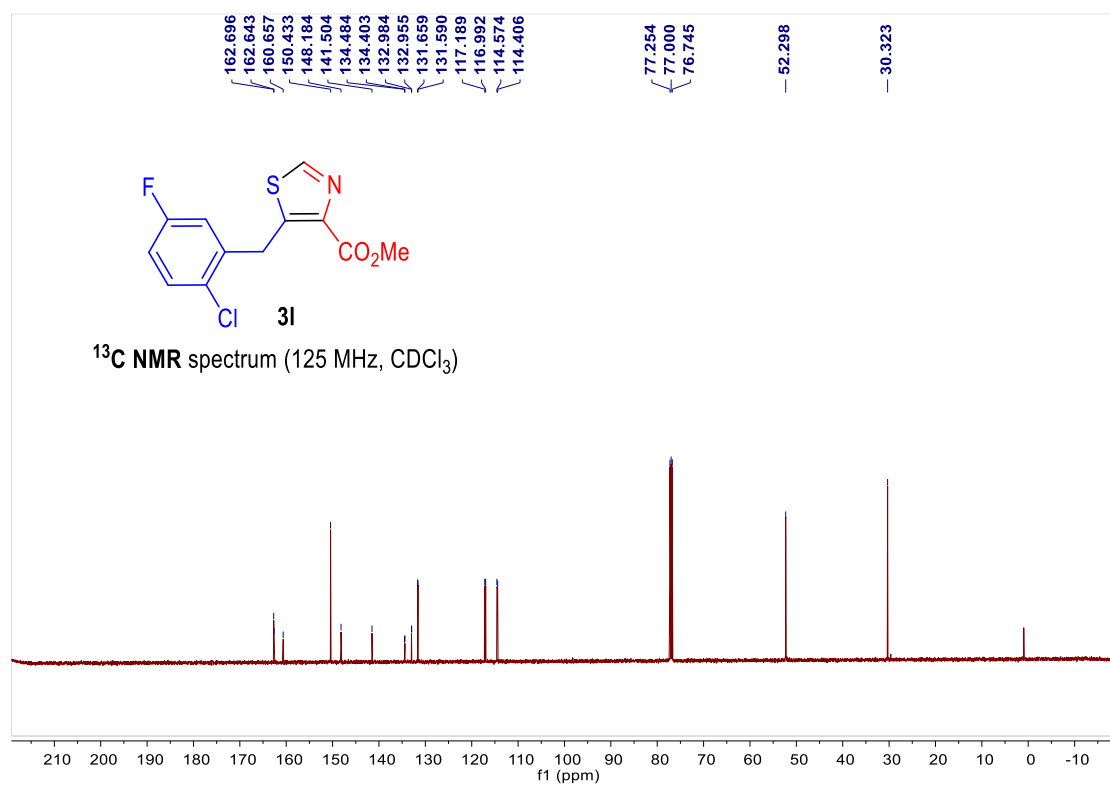



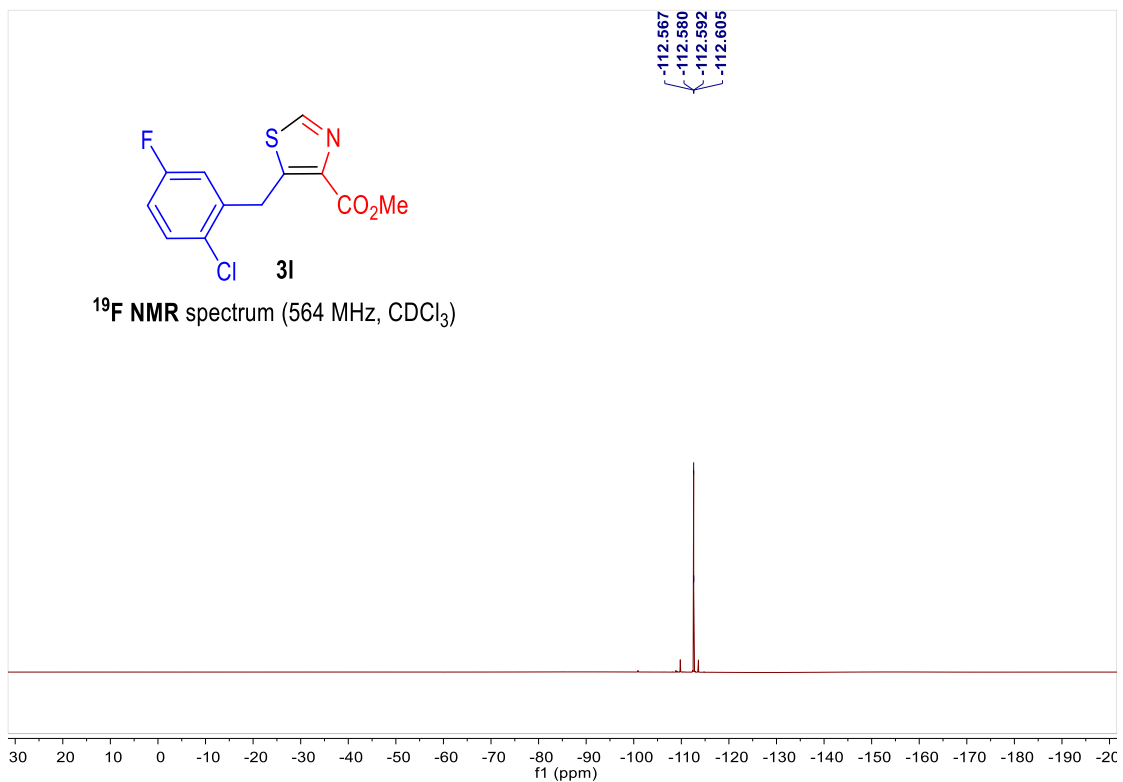

3m

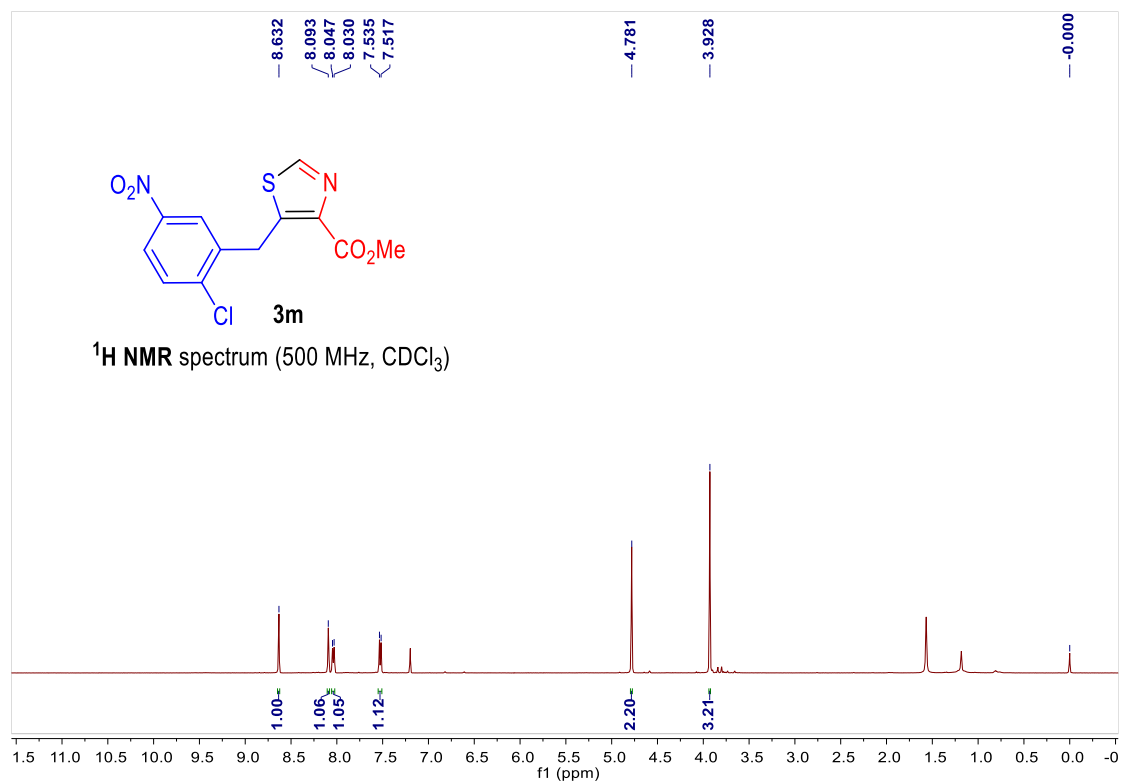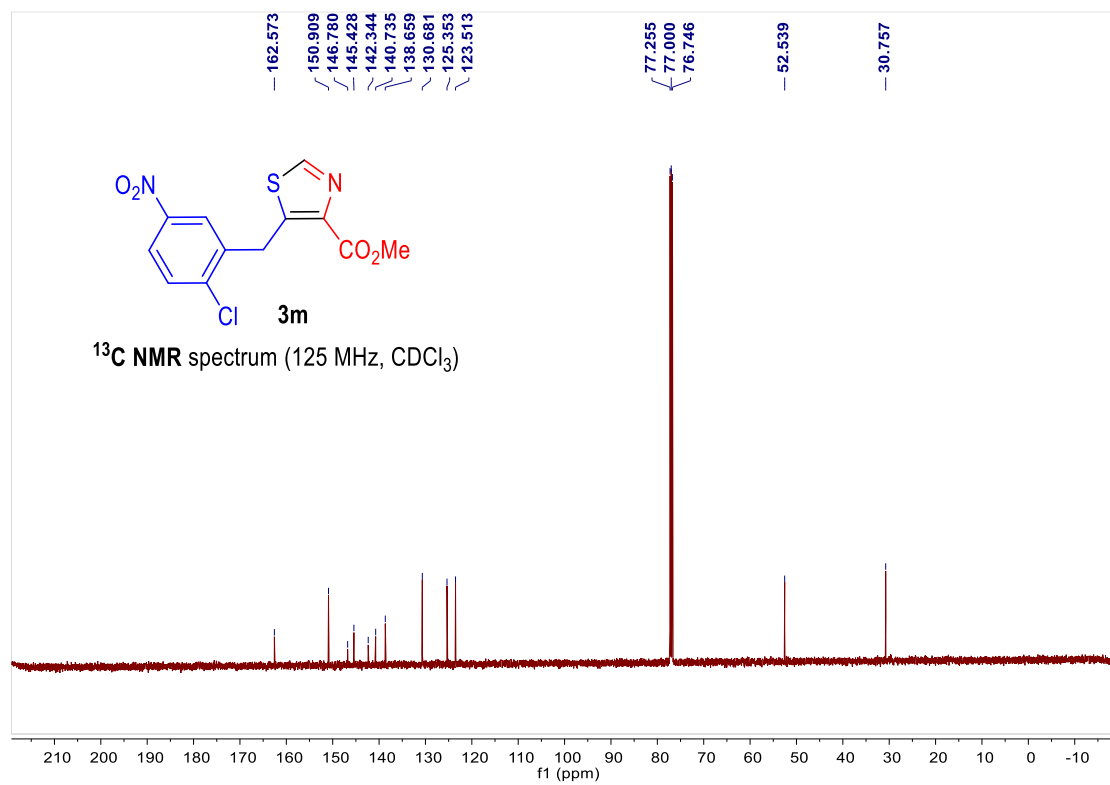

**3n**

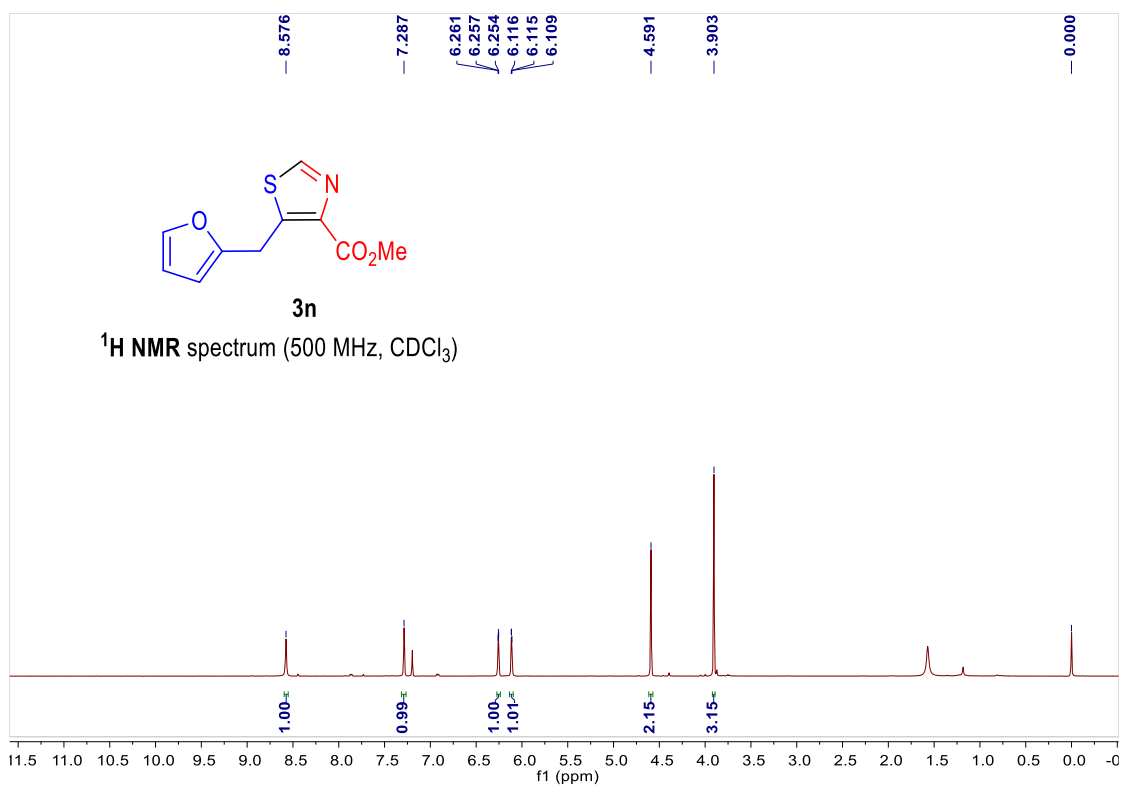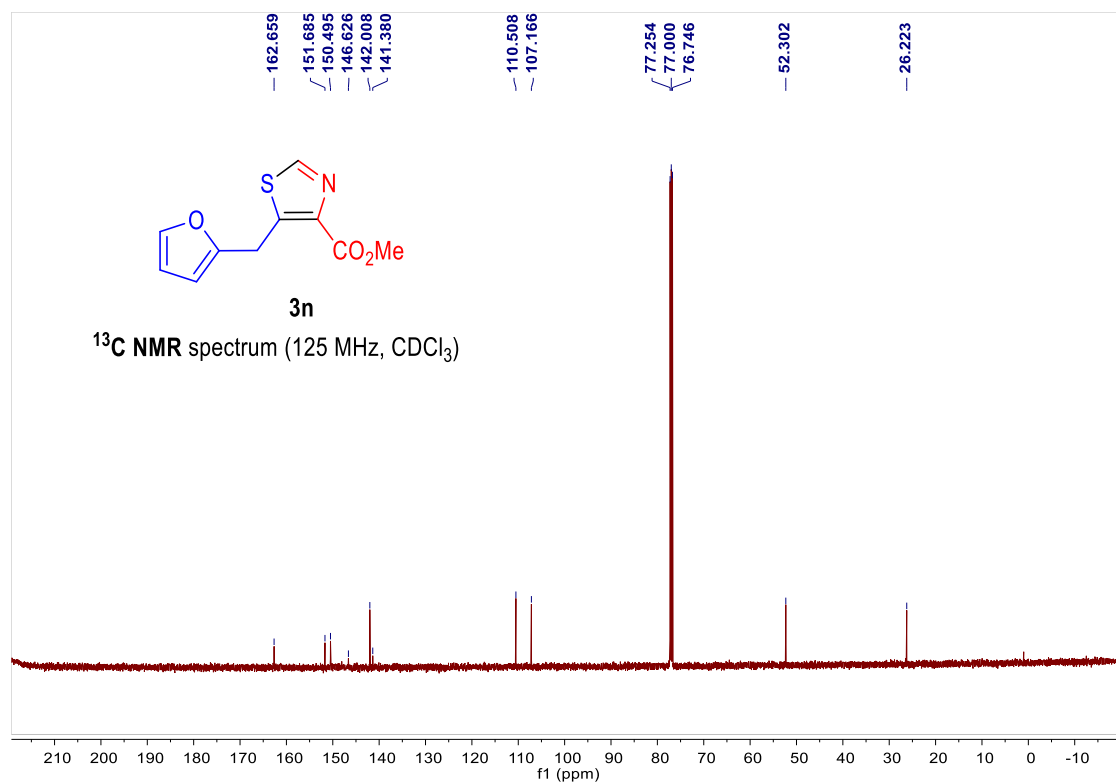

**3o**

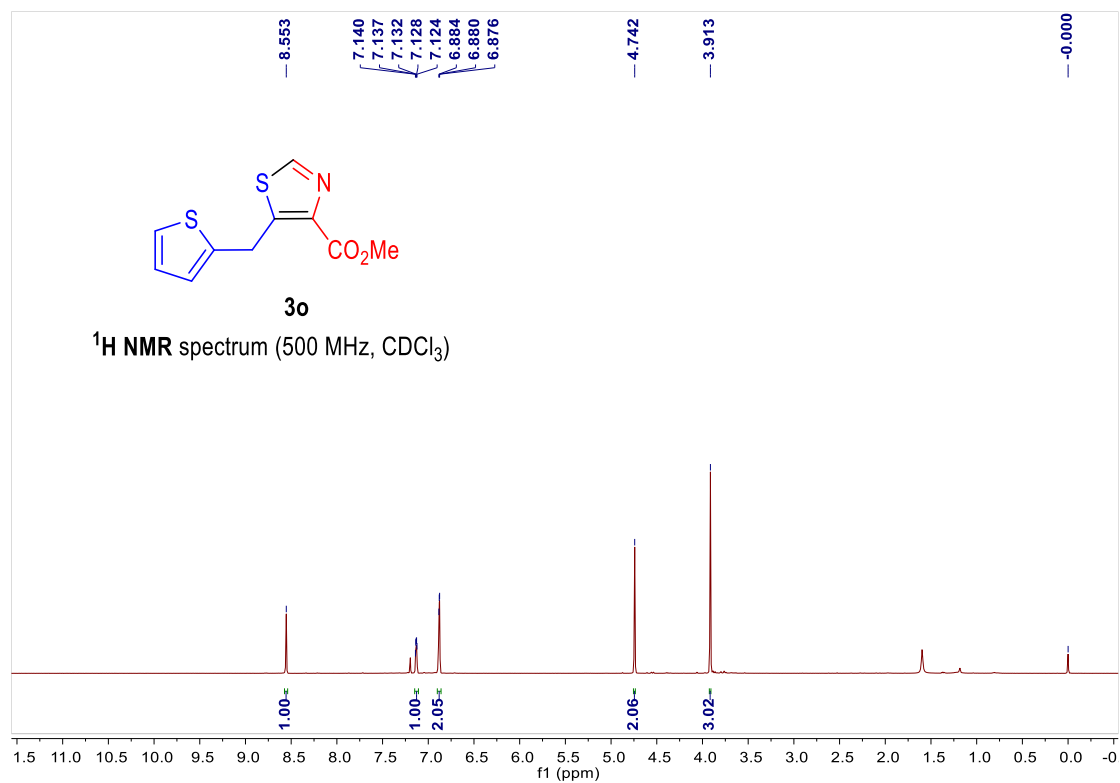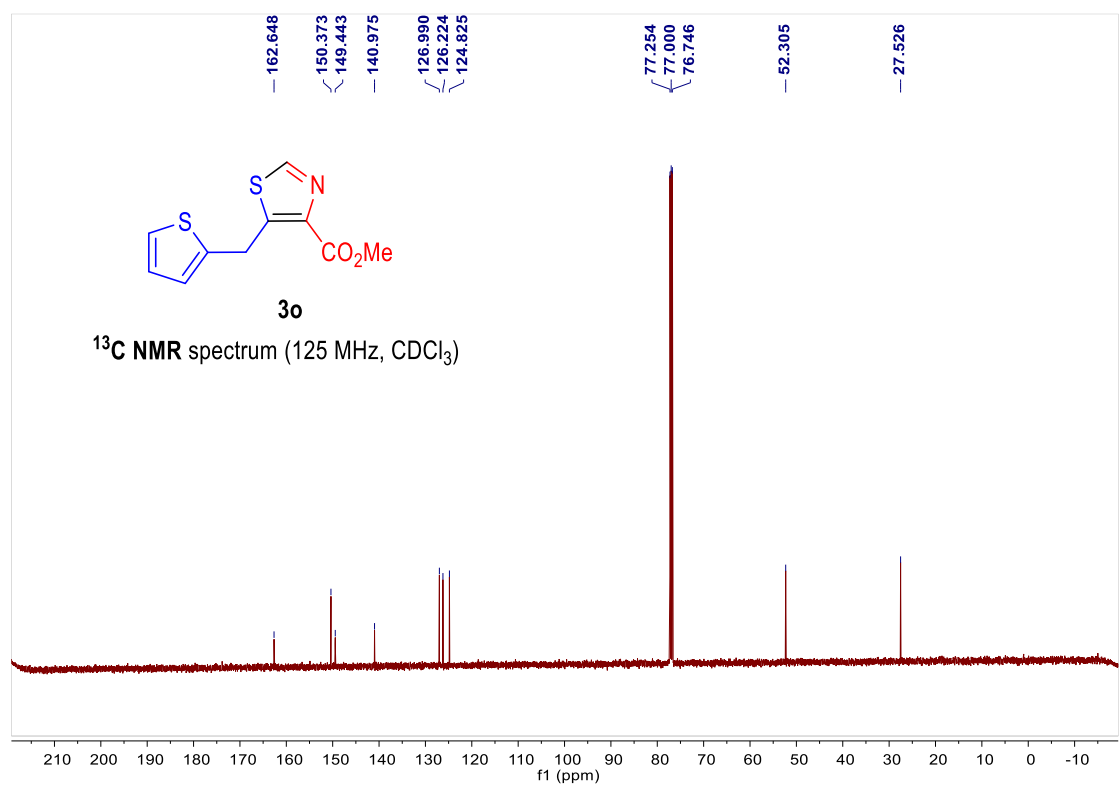

3p

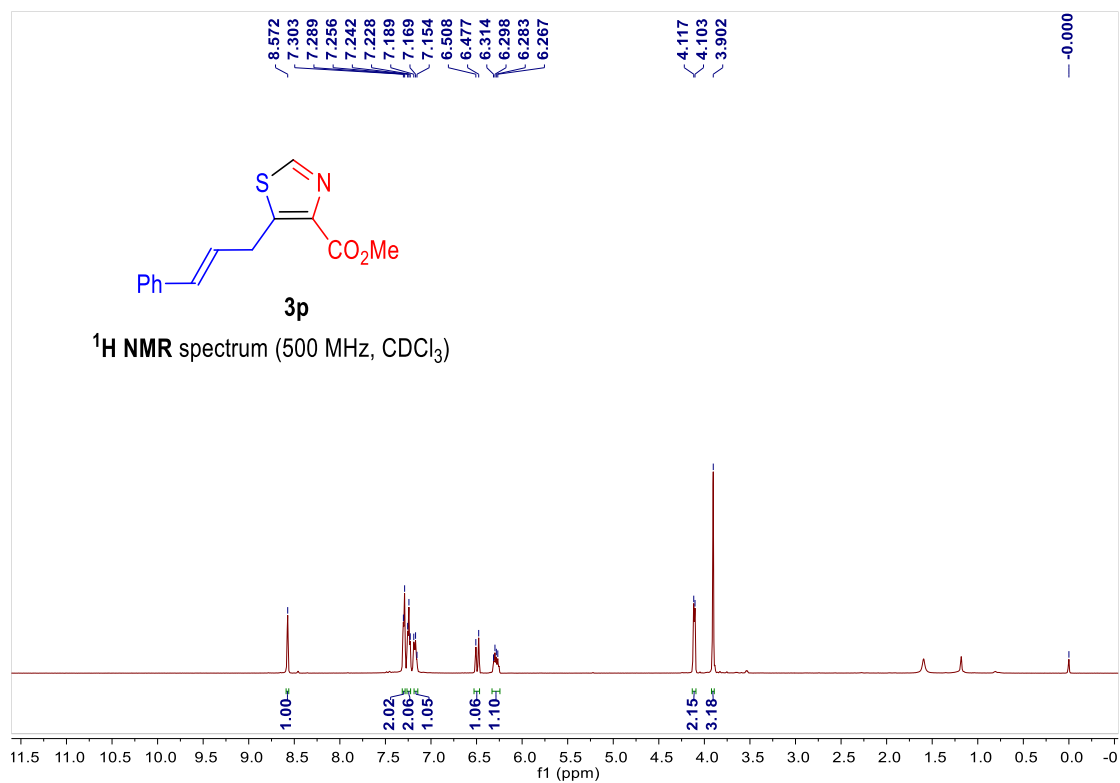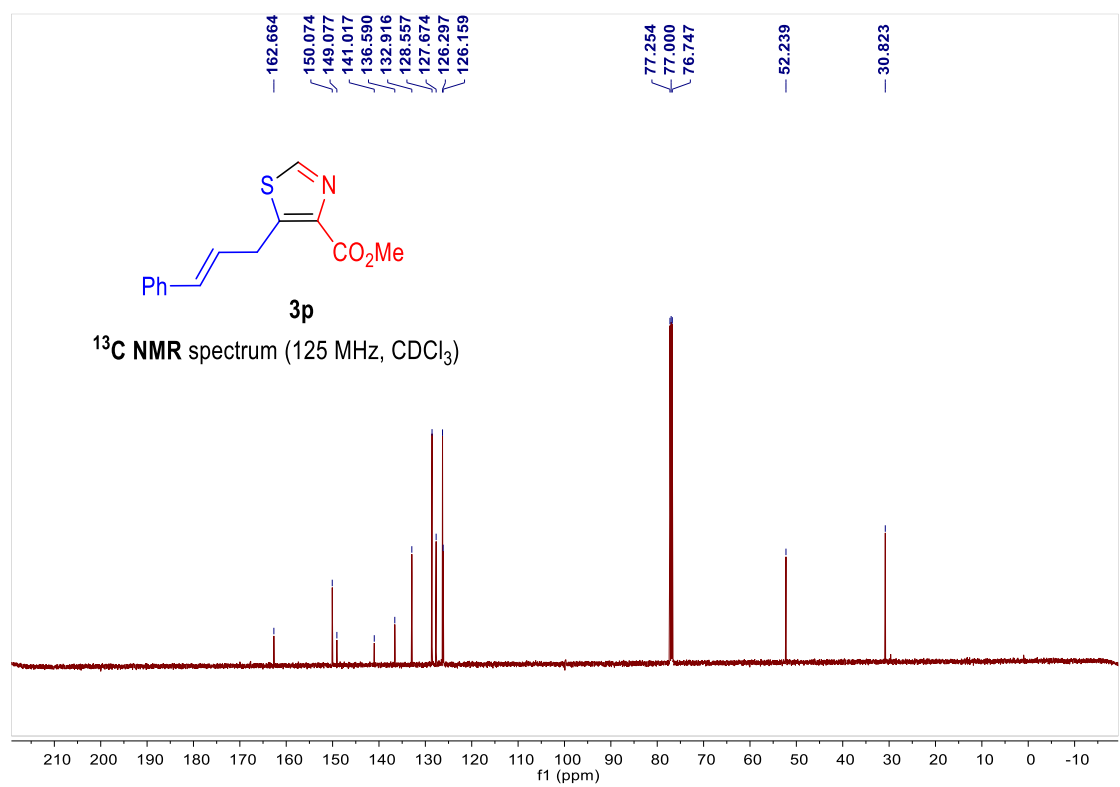

3q

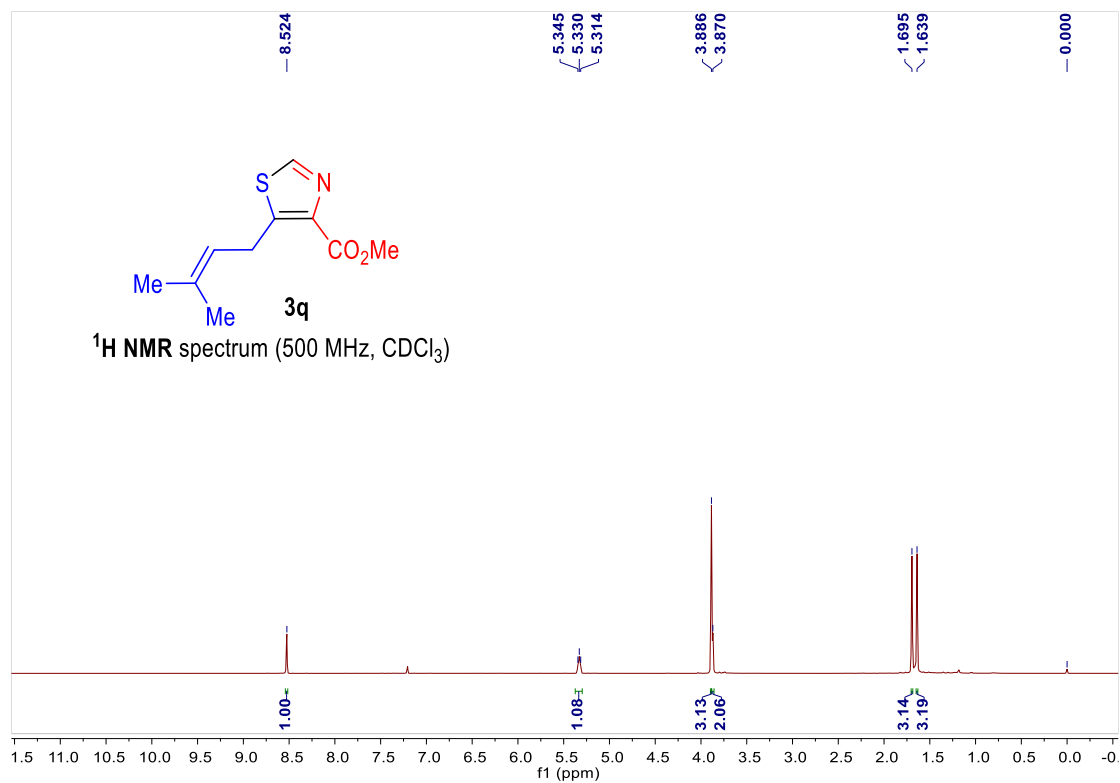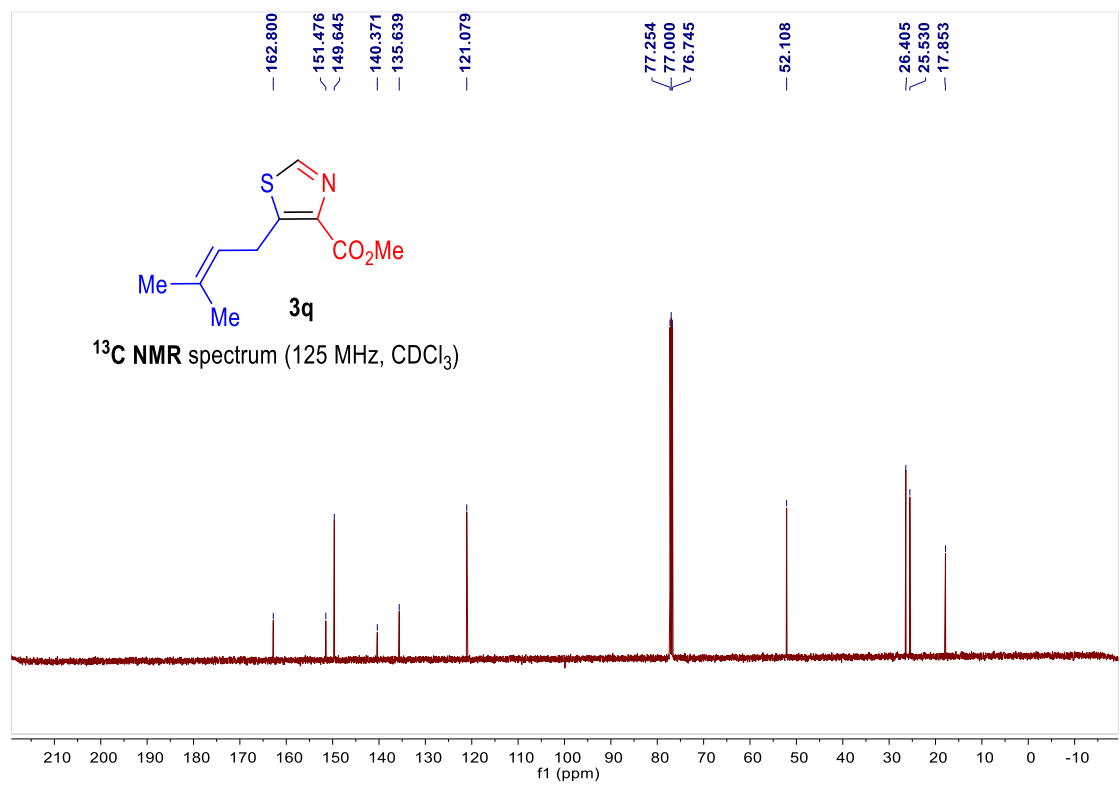

3r

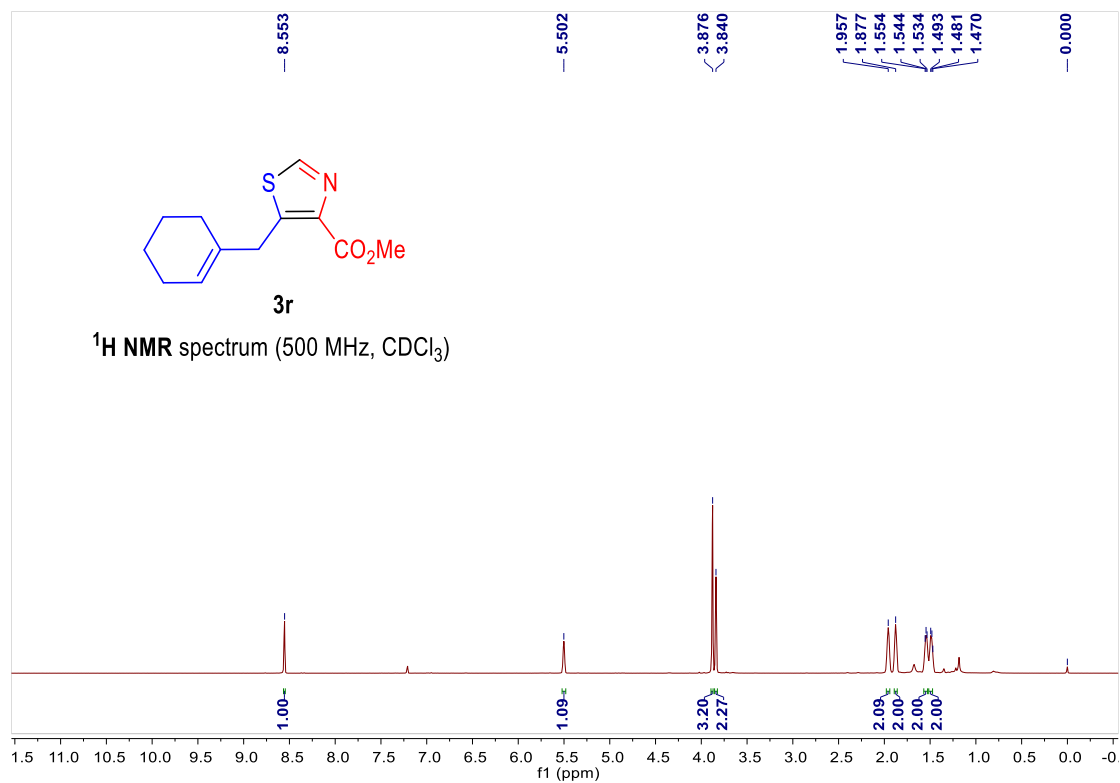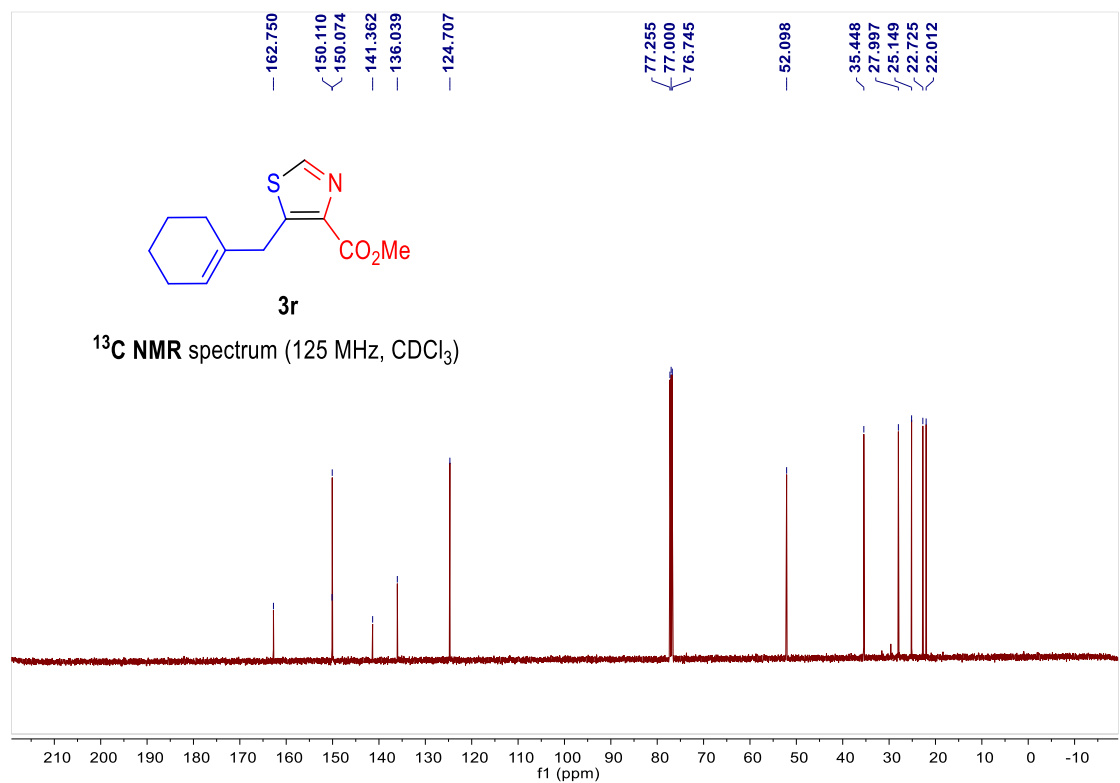

3s

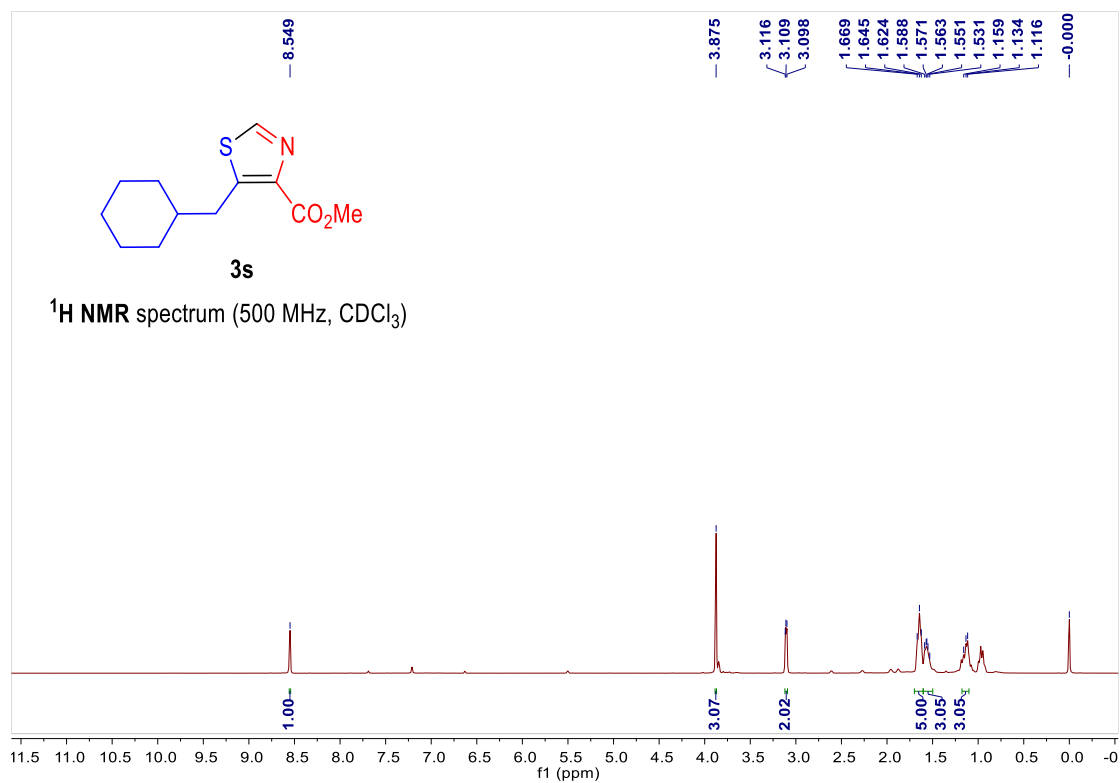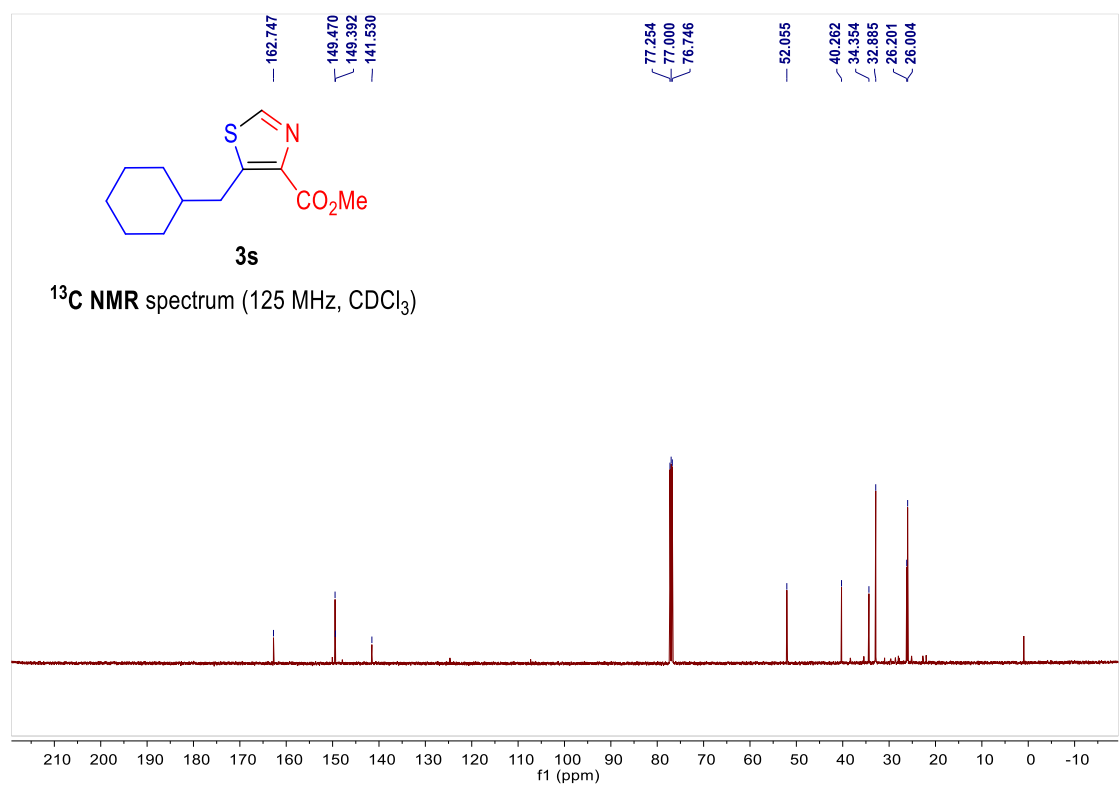



3t

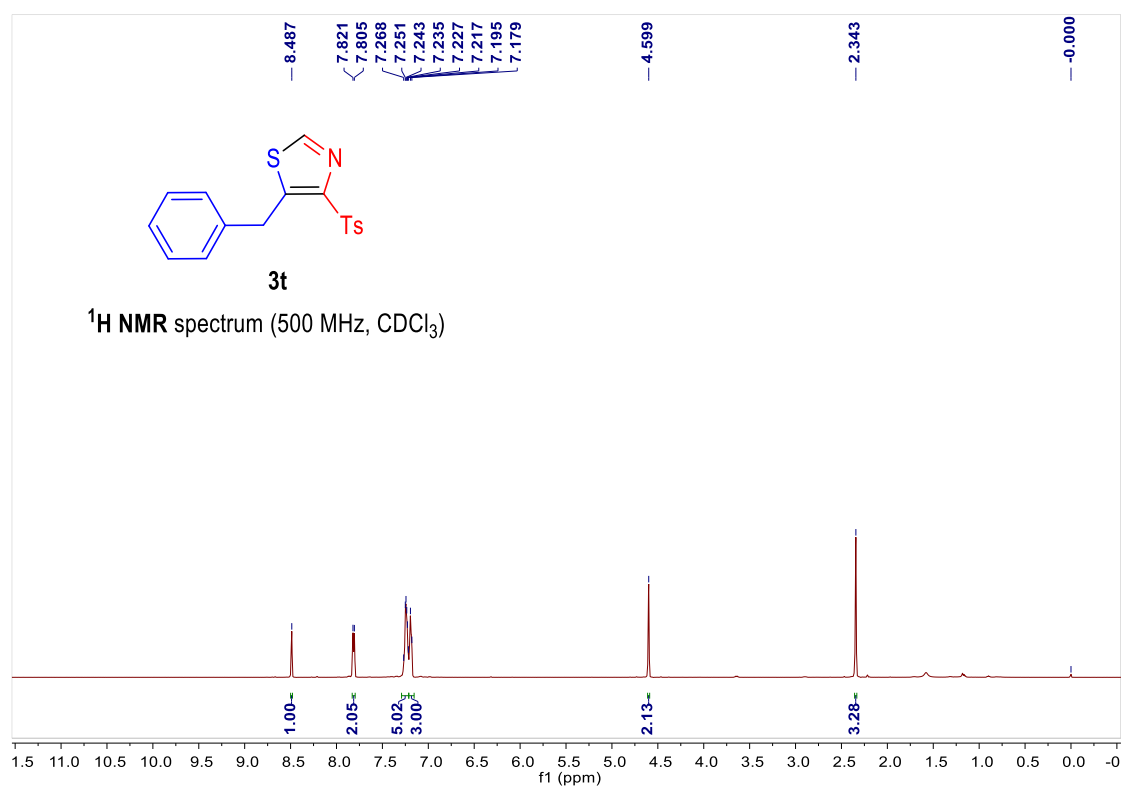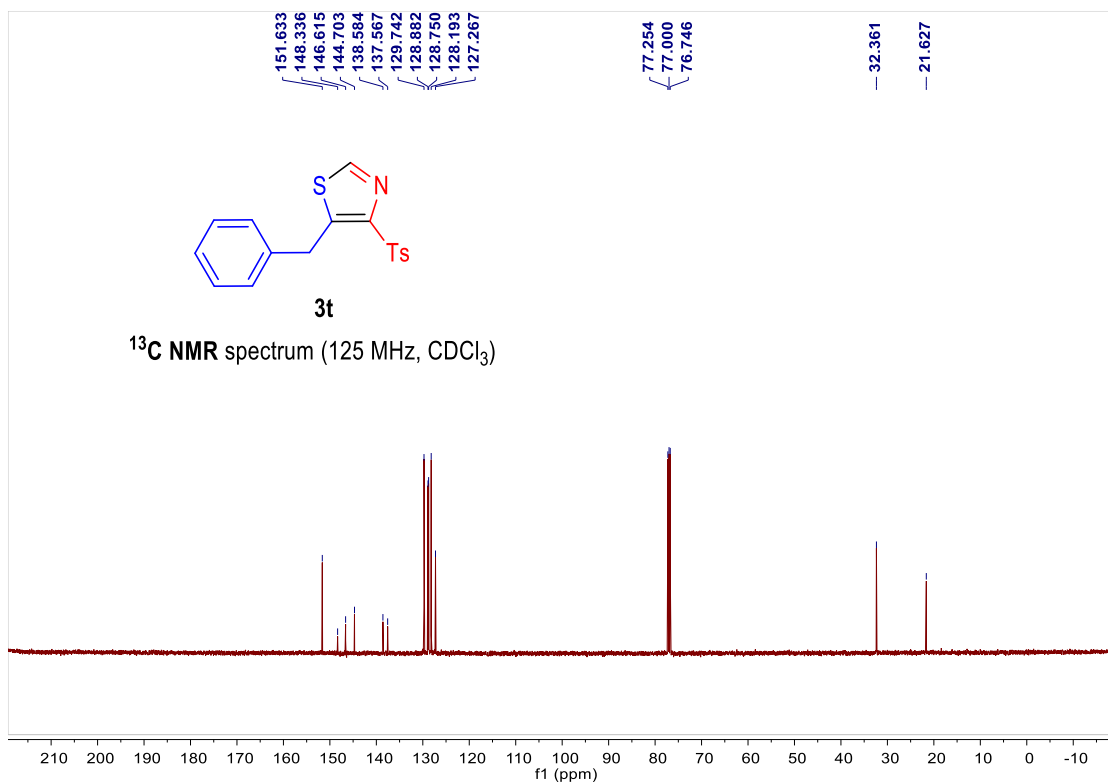

4

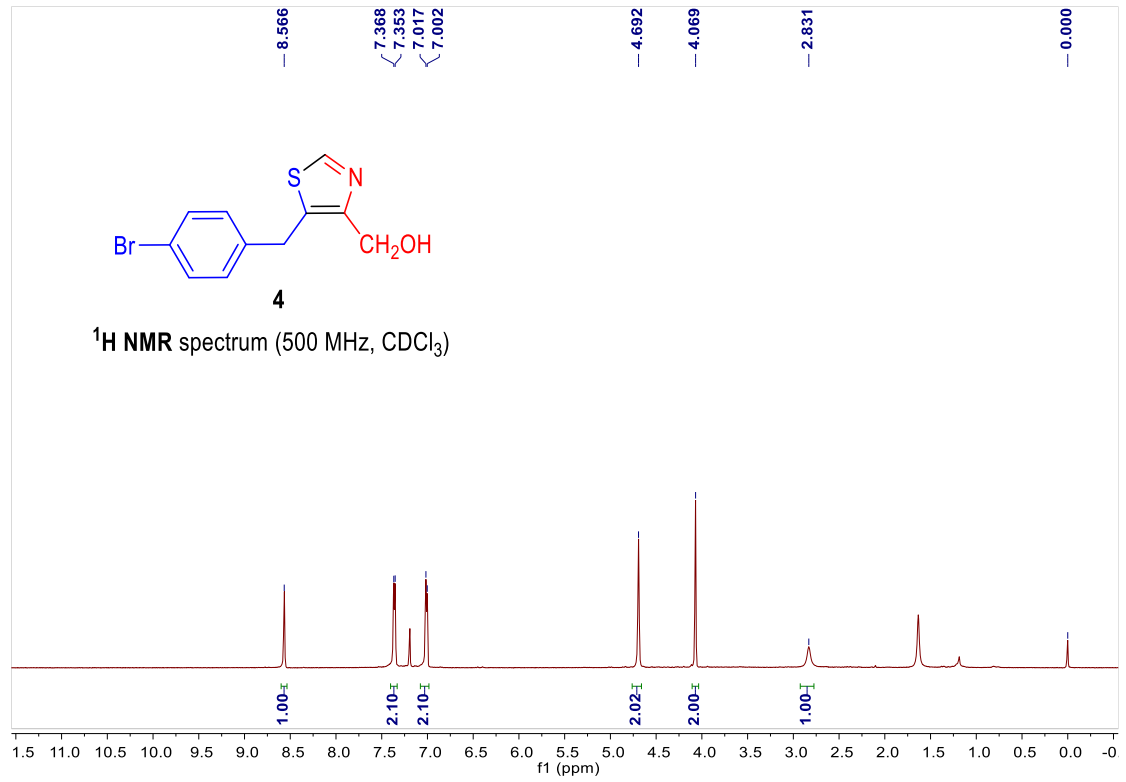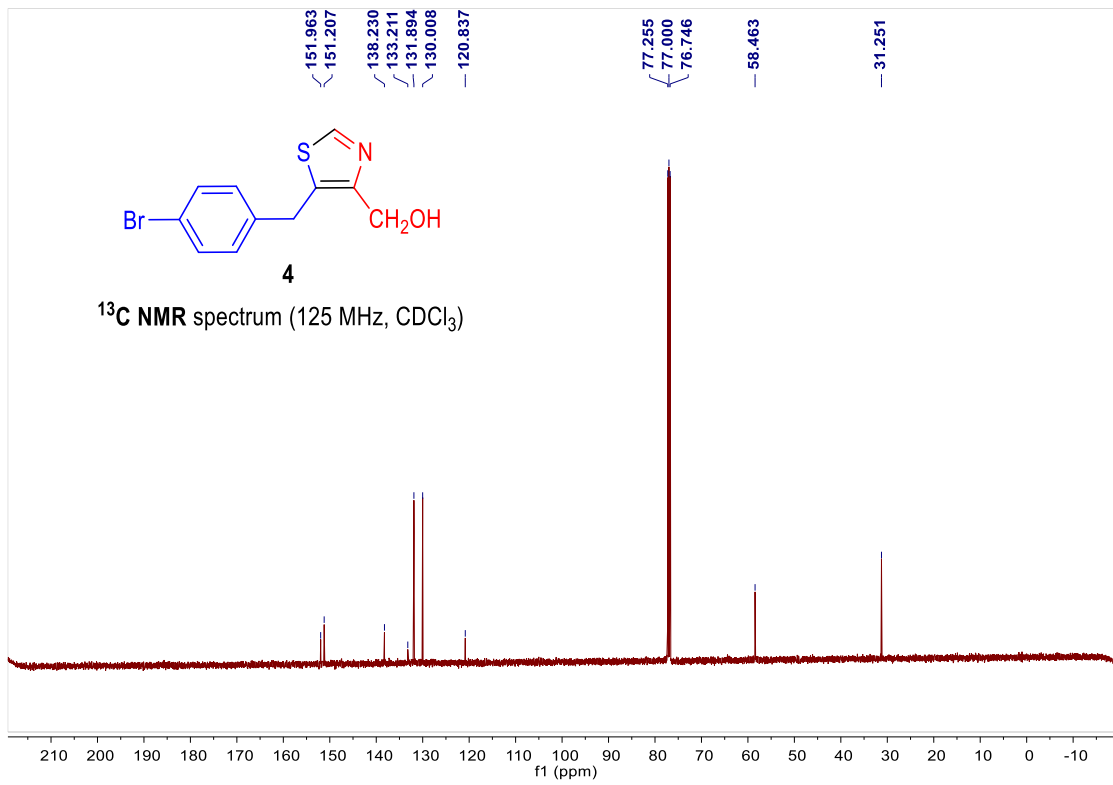

5

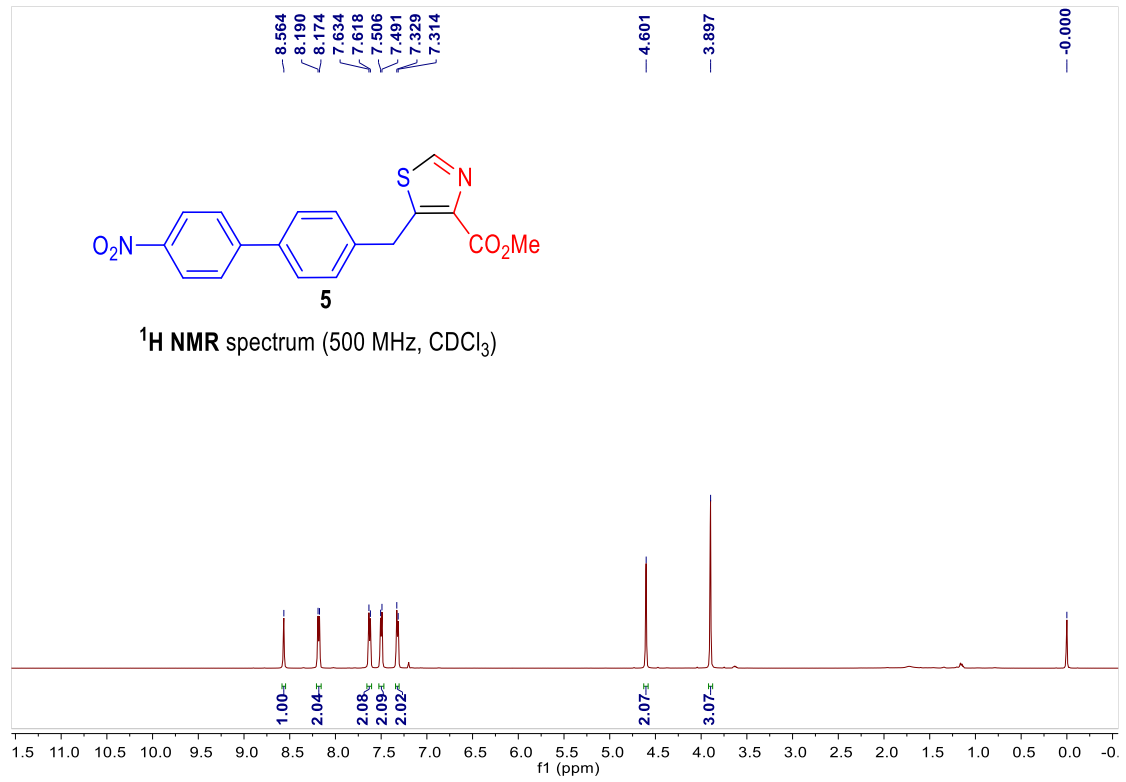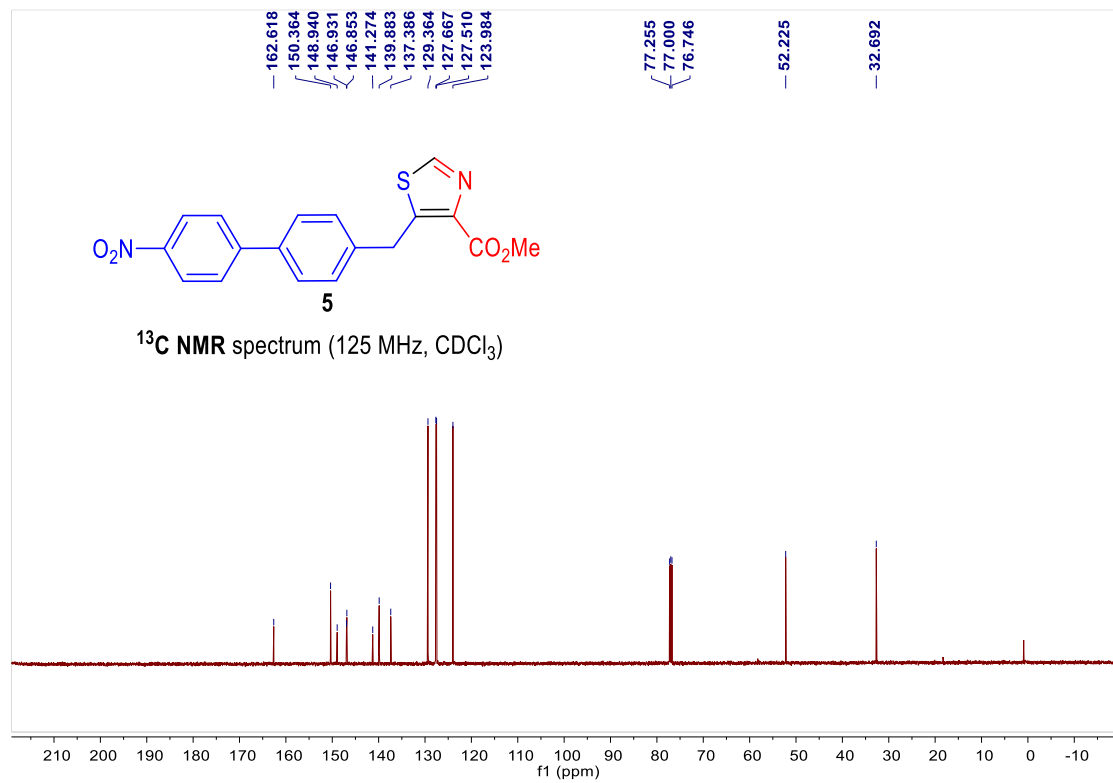

7

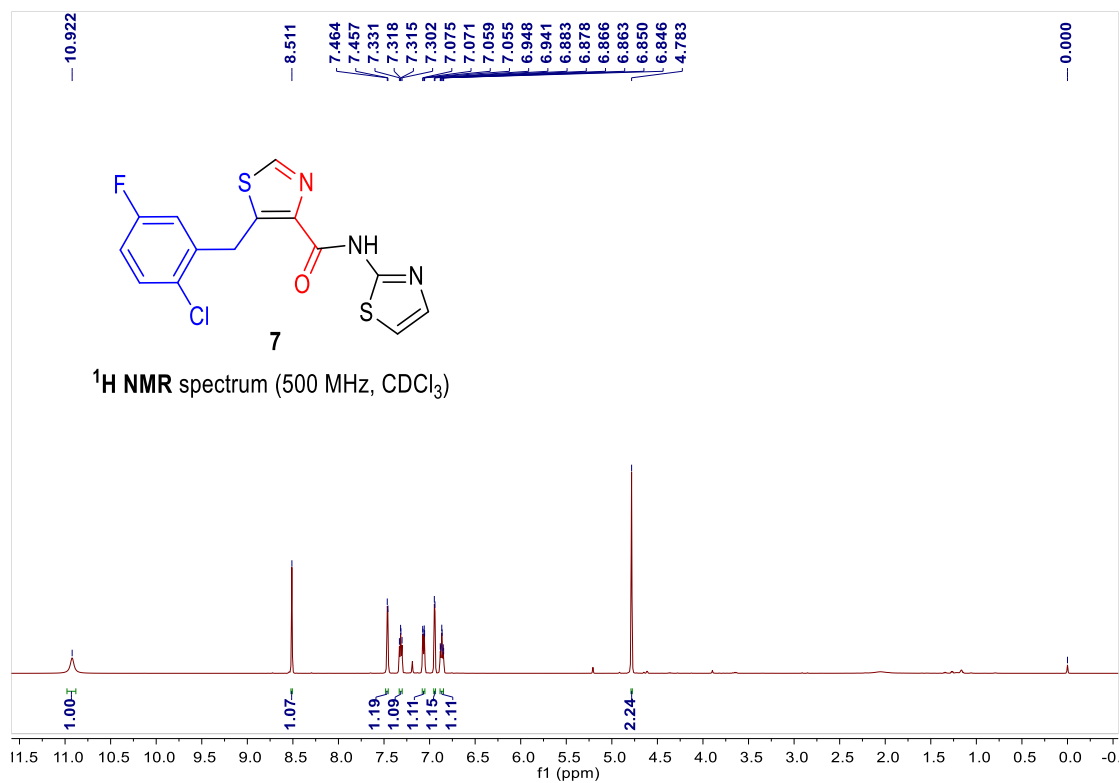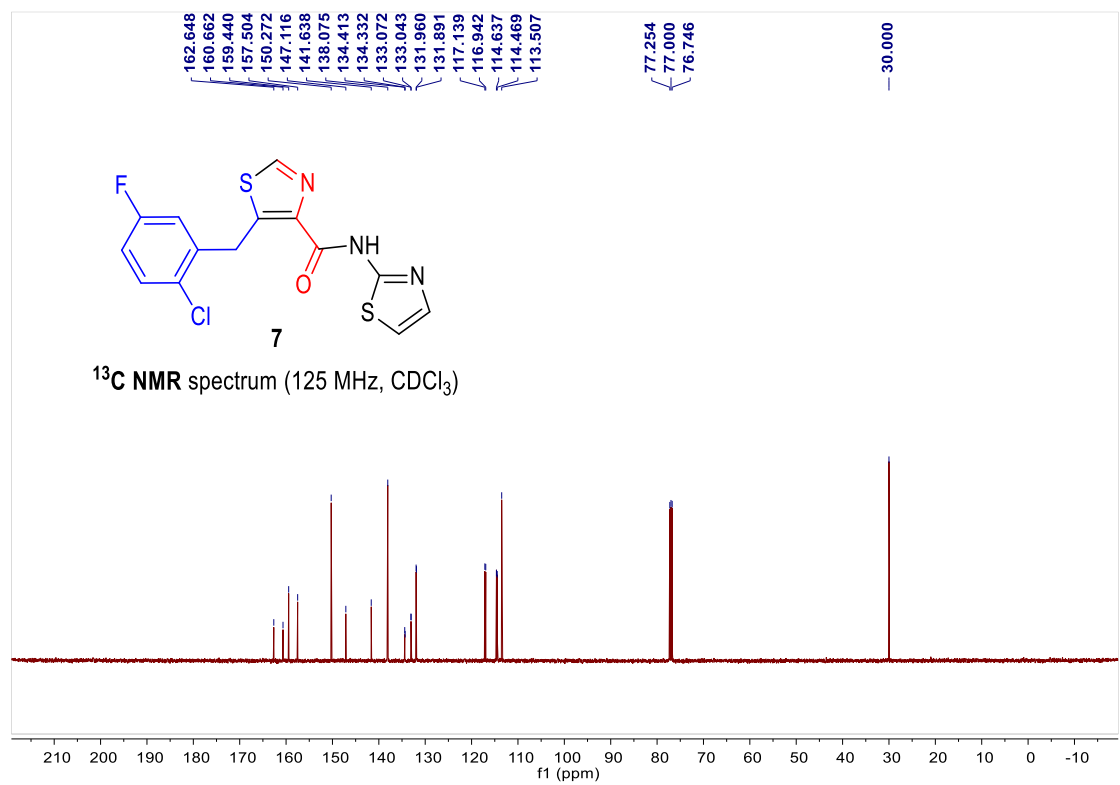

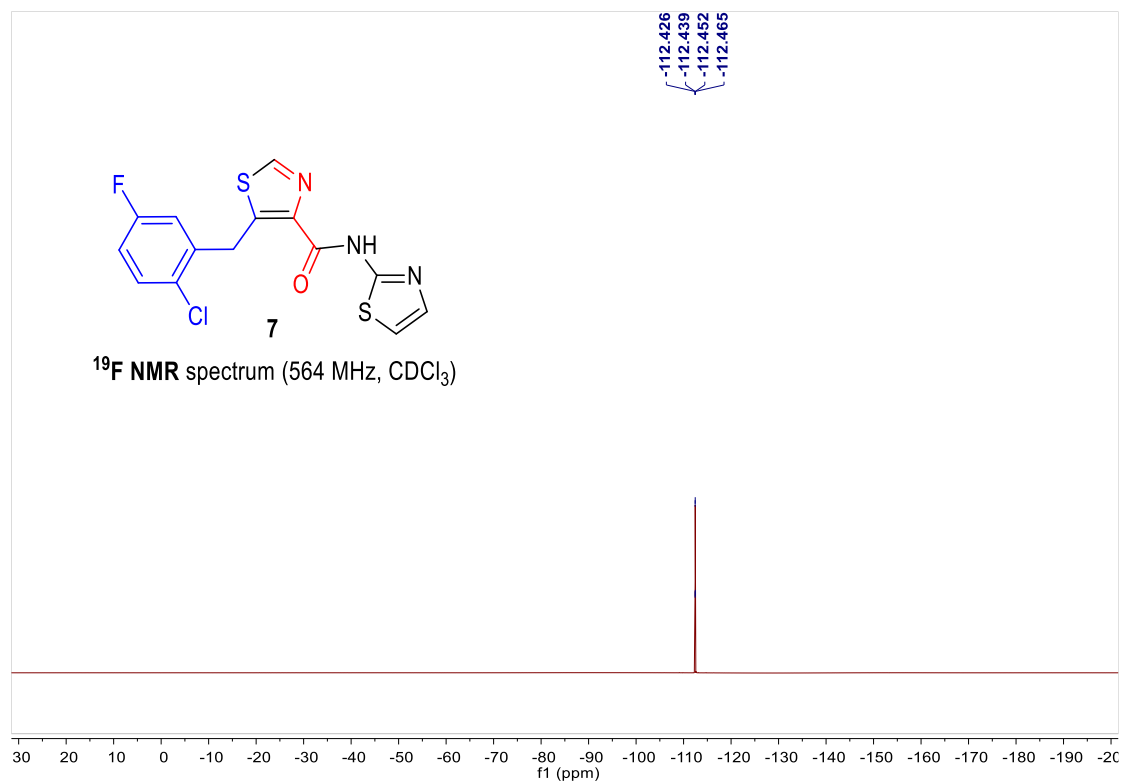

Supplement: d1qo00165e1.pdf [file d1qo00165e1.pdf]
